# Supplementary material for: Platelet transfusion for neonates with thrombocytopaenia: protocol for a systematic review
Source: PubMed Central journal article supplement — BMJ Open. 2020 Oct 16;10(10):e039132. doi: 10.1136/bmjopen-2020-039132 (PMC7569922; doi:10.1136/bmjopen-2020-039132), 2020-10-16
Supplement: bmjopen-2020-039132.draft_revisions.pdf [file bmjopen-2020-039132.draft_revisions.pdf]

# BMJ Open

BMJ Open is committed to open peer review. As part of this commitment we make the peer review history of every article we publish publicly available.

When an article is published we post the peer reviewers' comments and the authors' responses online. We also post the versions of the paper that were used during peer review. These are the versions that the peer review comments apply to.

The versions of the paper that follow are the versions that were submitted during the peer review process. They are not the versions of record or the final published versions. They should not be cited or distributed as the published version of this manuscript.

BMJ Open is an open access journal and the full, final, typeset and author-corrected version of record of the manuscript is available on our site with no access controls, subscription charges or pay-per-view fees (<http://bmjopen.bmj.com>).

If you have any questions on BMJ Open's open peer review process please email [info.bmjopen@bmj.com](mailto:info.bmjopen@bmj.com)

# BMJ Open

## Platelet Transfusion for Neonates with Thrombocytopenia: Protocol for a Systematic Review

|                               |                                                                                                                                                                                                                                                                                                                                                                                                                                                                                                                                                                                                                                                                                                                                                                                                                                                                                                                                                                                                                                                                                                                                           |
|-------------------------------|-------------------------------------------------------------------------------------------------------------------------------------------------------------------------------------------------------------------------------------------------------------------------------------------------------------------------------------------------------------------------------------------------------------------------------------------------------------------------------------------------------------------------------------------------------------------------------------------------------------------------------------------------------------------------------------------------------------------------------------------------------------------------------------------------------------------------------------------------------------------------------------------------------------------------------------------------------------------------------------------------------------------------------------------------------------------------------------------------------------------------------------------|
| Journal:                      | <i>BMJ Open</i>                                                                                                                                                                                                                                                                                                                                                                                                                                                                                                                                                                                                                                                                                                                                                                                                                                                                                                                                                                                                                                                                                                                           |
| Manuscript ID                 | bmjopen-2020-039132                                                                                                                                                                                                                                                                                                                                                                                                                                                                                                                                                                                                                                                                                                                                                                                                                                                                                                                                                                                                                                                                                                                       |
| Article Type:                 | Protocol                                                                                                                                                                                                                                                                                                                                                                                                                                                                                                                                                                                                                                                                                                                                                                                                                                                                                                                                                                                                                                                                                                                                  |
| Date Submitted by the Author: | 05-Apr-2020                                                                                                                                                                                                                                                                                                                                                                                                                                                                                                                                                                                                                                                                                                                                                                                                                                                                                                                                                                                                                                                                                                                               |
| Complete List of Authors:     | <p>Liu, Denjun; Sichuan University West China Second University Hospital, Department of Pediatrics; Sichuan University, Key Laboratory of Birth Defects and Related Diseases of Women and Children Ministry of Education</p> <p>Wu, Jinlin; Sichuan University West China Second University Hospital, Department of Pediatrics; Sichuan University, Key Laboratory of Birth Defects and Related Diseases of Women and Children Ministry of Education</p> <p>Xiong, tao; Sichuan University West China Second University Hospital, Department of Pediatrics; Sichuan University, Key Laboratory of Birth Defects and Related Diseases of Women and Children Ministry of Education</p> <p>Yue, Yan; Sichuan University West China Second University Hospital, Department of Pediatrics; Sichuan University, Key Laboratory of Birth Defects and Related Diseases of Women and Children Ministry of Education</p> <p>Tang, Jun; Sichuan University West China Second University Hospital, Department of Pediatrics; Sichuan University, Key Laboratory of Birth Defects and Related Diseases of Women and Children Ministry of Education</p> |
| Keywords:                     | Blood bank & transfusion medicine < HAEMATOLOGY, Bleeding disorders & coagulopathies < HAEMATOLOGY, Neonatal intensive & critical care < INTENSIVE & CRITICAL CARE                                                                                                                                                                                                                                                                                                                                                                                                                                                                                                                                                                                                                                                                                                                                                                                                                                                                                                                                                                        |
|                               |                                                                                                                                                                                                                                                                                                                                                                                                                                                                                                                                                                                                                                                                                                                                                                                                                                                                                                                                                                                                                                                                                                                                           |

SCHOLARONE™  
Manuscripts

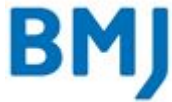

I, the Submitting Author has the right to grant and does grant on behalf of all authors of the Work (as defined in the below author licence), an exclusive licence and/or a non-exclusive licence for contributions from authors who are: i) UK Crown employees; ii) where BMJ has agreed a CC-BY licence shall apply, and/or iii) in accordance with the terms applicable for US Federal Government officers or employees acting as part of their official duties; on a worldwide, perpetual, irrevocable, royalty-free basis to BMJ Publishing Group Ltd ("BMJ") its licensees and where the relevant Journal is co-owned by BMJ to the co-owners of the Journal, to publish the Work in this journal and any other BMJ products and to exploit all rights, as set out in our [licence](#).

The Submitting Author accepts and understands that any supply made under these terms is made by BMJ to the Submitting Author unless you are acting as an employee on behalf of your employer or a postgraduate student of an affiliated institution which is paying any applicable article publishing charge ("APC") for Open Access articles. Where the Submitting Author wishes to make the Work available on an Open Access basis (and intends to pay the relevant APC), the terms of reuse of such Open Access shall be governed by a Creative Commons licence – details of these licences and which [Creative Commons](#) licence will apply to this Work are set out in our licence referred to above.

Other than as permitted in any relevant BMJ Author's Self Archiving Policies, I confirm this Work has not been accepted for publication elsewhere, is not being considered for publication elsewhere and does not duplicate material already published. I confirm all authors consent to publication of this Work and authorise the granting of this licence.

1  
2  
3  
4 1 **Platelet Transfusion for Neonates with Thrombocytopenia: Protocol for a**  
5  
6 2 **Systematic Review**

7 3 Dengjun Liu<sup>1,2#</sup>, MD, Jinlin Wu<sup>1,2#</sup>, MD, PhD, Tao Xiong<sup>1,2\*</sup>, MD, PhD, Yan Yue<sup>1,2</sup>,  
8 4 MD, Jun Tang<sup>1,2</sup>, MD, PhD

9  
10  
11 5  
12 6 <sup>1</sup> Department of Pediatrics, West China Second University Hospital, Sichuan University,  
13 7 Chengdu, China

14 8 <sup>2</sup> Key Laboratory of Birth Defects and Related Diseases of Women and Children (Sichuan  
15 9 University) Ministry of Education

16 10 Dengjun Liu: dengjunliu97@163.com

17 11 Jinlin Wu: 373053785@qq.com

18 12 Yan Yue: yueyan\_1994@163.com

19 13 Jun Tang: tj1234753@sina.com

20 14 **Funding**

21 15 This work is supported by the National Science Foundation of China (No. 81300525 to Tao  
22 16 Xiong), and the Fundamental Research Funds for the Central Universities (to Tao Xiong).

23 17  
24 18 # Joint first authors: Dengjun Liu and Jinlin Wu

25 19  
26 20 **\*Correspondence**

27 21 Dr. Tao Xiong No. 20, Section Three, South Renmin Road, Chengdu, China

28 22 Tel: 15126616986

29 23 Email: tao\_xiong@126.com

30 24  
31 25 Word count: 1742

## 26 **ABSTRACT**

### 27 **Introduction**

28 Thrombocytopenia is one of the most common haemostatic abnormalities among  
29 neonates. It affects approximately one-quarter of neonates admitted into neonatal  
30 intensive care units (NICUs) and may lead to high risks of bleeding and mortality,  
31 which are great concerns of neonatologists. Platelet transfusion (PT) is a specific  
32 treatment for thrombocytopenia. To date, PT thresholds are diverse, since the  
33 associations between low platelet count and negative outcomes are not clear. We  
34 propose this protocol for a systematic review to collect and assess evidence concerning  
35 the best PT threshold to reduce mortality, bleeding and major morbidity among  
36 neonates with thrombocytopenia.

### 37 **Methods and analysis**

38 The systematic review will be performed according to the Cochrane Handbook for  
39 Systematic Review of Interventions, the PRISMA statement, and the GRADE system.  
40 Two independent researchers will perform the study selection, data extraction/coding,  
41 quality assessment and further analyses of the included studies, with disagreements  
42 being resolved by a third researcher. We will search for neonatal PT in the following  
43 electronic databases: MEDLINE, The Cochrane Library, and EMBASE. All  
44 randomized controlled trials (RCTs) and cohort studies will be included without any  
45 restrictions regarding publication date or language. The primary outcome will comprise  
46 in-hospital mortality and bleeding episodes. Endnote X9 and Review Manager V.5.3  
47 software will be used to manage the selection process and statistical analysis,  
48 respectively. If the included studies are sufficient and homogeneous for any of the  
49 outcomes, a quantitative synthesis (meta-analysis) may be performed. Otherwise, we  
50 will conduct a narrative systematic review of the results.

### 51 **Ethics and dissemination**

52 Ethical approval is not required for this study because the data are from published  
53 studies and will not include individual patient data. The results of this study are  
54 anticipated to be published in a peer-reviewed journal.

1  
2  
3  
4 55 **Strengths and limitations of this study**

- 56 ▶ This study will be the first systematic review to evaluate the evidence regarding PT  
57 therapy for neonates with thrombocytopenia.
- 58 ▶ Comprehensive outcomes including in-hospital mortality, bleeding episodes,  
59 morbidity, the adverse effects of transfusion, and length of stay will be evaluated.
- 60 ▶ The approach of the review will be performed according to the Cochrane Handbook  
61 and the PRISMA statement.
- 62 ▶ The quality of evidence will be affected by the bias in original studies.
- 63 ▶ The results of this systematic review may be helpful for both clinical decisions and  
64 further study.
- 23  
24  
25  
26  
27  
28  
29  
30  
31  
32  
33  
34  
35  
36  
37  
38  
39  
40  
41  
42  
43  
44  
45  
46  
47  
48  
49  
50  
51  
52  
53  
54  
55  
56  
57  
58  
59  
60

## 65 BACKGROUND

66 Thrombocytopenia, defined as a platelet count less than 150 000/ $\mu$ L, is a common  
67 haemostatic abnormality among neonates, especially premature infants.<sup>1 2</sup> The  
68 aetiology of thrombocytopenia is complicated and involves multiple factors, including  
69 abnormal immunity, infection, and asphyxia.<sup>3-7</sup> Thrombocytopenia may be a sole  
70 clinical manifestation or complication of other diseases, such as sepsis or necrotizing  
71 enterocolitis.<sup>3-5 8</sup> Approximately 9.4% to 35% of neonates admitted to neonatal  
72 intensive care units (NICUs) develop thrombocytopenia.<sup>5 9-12</sup> Theoretically, neonates  
73 with thrombocytopenia may develop a high risk of bleeding and mortality. Thus, this  
74 condition is a significant and unresolved problem for neonatologists.

75 Platelet transfusion (PT) is commonly used as a prophylactic and therapeutic  
76 treatment for bleeding episodes in neonates with thrombocytopenia. To date, the  
77 relationship between low platelet count and major bleeding or mortality is not clear,  
78 and the efficacy of PT remains controversial.<sup>5 13-15</sup> Current guidelines generally  
79 recommend prophylactical PT for thrombocytopenic neonates.<sup>16-19</sup> The recommended  
80 thresholds vary from 20 000/ $\mu$ L to 30 000/ $\mu$ L<sup>15-17 20-25</sup> for non-bleeding stable neonates,  
81 while the thresholds range from 30 000/ $\mu$ L to 50 000/ $\mu$ L<sup>15 21 24-26</sup> for non-bleeding  
82 unstable neonates. These guidelines are consensus guidelines rather than evidence-  
83 based guidelines.<sup>19 27</sup> Thus, there is great diversity in PT thresholds among different  
84 NICUs.<sup>28 29</sup>

85 Theoretically, compared with that at a low threshold, PT at a high threshold may  
86 reduce the risks of severe thrombocytopenia, subsequent mortality and bleeding  
87 episodes. Surprisingly, a recent randomized controlled trial (RCT) reported that PT at  
88 a high threshold increased mortality and bleeding episodes in preterm infants with  
89 severe thrombocytopenia compared with PT at a low threshold.<sup>14</sup> On the other hand, as  
90 an invasive therapy, PT has some acknowledged adverse events, including transfusion-  
91 transmitted infections, bacterial sepsis, febrile nonhemolytic transfusion reaction,  
92 transfusion-associated circulatory overload, transfusion-related acute lung injury, and  
93 immune-mediated platelet destruction.<sup>3 30-32</sup> Furthermore, PT has a higher risk of these

1  
2  
3  
4 94 adverse events than transfusions of other blood products due to its pro-inflammatory  
5  
6 95 function.

7  
8 96 Recently, more clinical trials regarding PT in neonates with thrombocytopenia  
9  
10 97 have been completed. To assess the best threshold and safety of PT, we will perform  
11  
12 98 this systematic review and meta-analysis to summarize current evidence for PT in  
13  
14 99 neonates.

15  
16 100

### 101 **Objectives**

102 Several reports have argued that a lower transfusion threshold may reduce the incidence  
103 of unnecessary transfusion and financial costs without the extra risks of bleeding and  
104 mortality.<sup>13 15</sup> We propose this protocol for a systematic review to collect and assess the  
105 evidence concerning the best threshold for PT to reduce mortality, bleeding and major  
106 morbidity among neonates with thrombocytopenia. We will further explore the best  
107 thresholds for PT for neonates with thrombocytopenia due to various causes and more  
108 specific clinical characteristics. Furthermore, the safety of PT will be assessed by  
109 comparing its side effects at different thresholds.

110

### 111 **METHODS AND ANALYSIS**

112 This protocol will be conducted on the basis of the Preferred Reporting Items for  
113 Systematic Review and Meta-Analysis Protocol (PRISMA-P) 2015 guidelines,<sup>33</sup> and  
114 further systematic review will be performed according to the Cochrane Handbook for  
115 Systematic Review of Interventions,<sup>34</sup> the PRISMA statement,<sup>35</sup> and the Grading of  
116 Recommendations Assessment, Development and Evaluation (GRADE) approach.<sup>36</sup>

117

#### 118 **Data sources and search strategy**

119 Comprehensive searches will be performed by two researchers independently in the  
120 following databases: MEDLINE, the Cochrane Library, and EMBASE. No restriction  
121 for language or publication year will be applied to the search. We will use the following  
122 keywords to search for and select relevant studies.



- 1  
2  
3  
4 123 1. For neonates, the following combination of search terms will be used: “infant” or  
5 124 “newborn” or “neonatal” or “neonate” or “preterm” or “premature” or “neonatology”.  
6  
7 125 2. For thrombocytopenia, the following search terms will be used: “thrombocytopenia”  
8 126 or “thrombocytopenic” or “NT”.  
9  
10  
11 127 3. For PT, the following search terms will be used: “platelet transfusion” or “platelet  
12 128 infusion therapy” or “platelet administration” or “PT”  
13  
14  
15 129 4. Steps 1, 2 and 3 will be combined with “and”.

16  
17 130 The detailed search strategy is shown in supplemental table 1.

18  
19 131 Furthermore, we will hand-check the references of all identified trials, relevant  
20 132 systematic reviews, and current treatment guidelines to avoid missing important studies.  
21  
22 133 Missing data will be handled by contacting relevant investigators for unreported  
23 134 materials or additional details.  
24  
25  
26

## 27 135

### 28 136 **Study eligibility**

#### 29 137 Types of studies

30  
31 138 We will include RCTs and cohort studies and exclude animal researches, in vitro studies,  
32 139 cross-sectional studies, case-control studies, case reports, case series, and secondary or  
33 140 tertiary articles (systematic reviews and meta-analyses).  
34  
35  
36

37 141 If there are enough data to answer this review's questions using only data from  
38 142 RCTs, we will report only data from RCTs.

#### 39 143 Types of participants

40  
41 144 New-born infants (less than 28 postnatal days) with thrombocytopenia (platelet  
42 145 counts < 150 000/ $\mu$ L) admitted to NICUs will be included. We will exclude studies for  
43 146 infants with congenital malformations.<sup>14</sup>  
44  
45  
46

#### 47 147 Types of interventions and comparators

48 148 The intervention of the included study is PT for thrombocytopenia. We will compare  
49 149 the effects of different transfusion platelet count thresholds. We will also record the  
50 150 type and dose of the platelet component received.  
51  
52

#### 53 151 Types of outcomes

54  
55  
56  
57  
58  
59  
60

1  
2  
3  
4 152 The primary outcome will be in-hospital mortality or bleeding episodes [including  
5 153 intraventricular haemorrhage (IVH), intracranial haemorrhage (ICH), pulmonary  
6 154 haemorrhage (PH), frank rectal bleeding, and other bleeding].

7  
8  
9 155 The secondary outcomes will be morbidity [including patent ductus arteriosus  
10 156 (PDA), sepsis, necrotizing enterocolitis (NEC), bronchopulmonary dysplasia (BPD),  
11 157 retinopathy of prematurity (ROP), etc.], adverse effects of transfusion, and length of  
12 158 stay (LOS).<sup>5 14 29 37-39</sup>

13  
14  
15  
16  
17 159

### 18 19 160 **Study selection**

20  
21 161 Two researchers will independently screen the titles and abstracts of the references  
22 162 retrieved by the searches. If eligible, the full texts of potential references will be  
23 163 obtained and assessed by two researchers. Studies approved by both investigators will  
24 164 be included in this meta-analysis. Discrepancies in inclusion and exclusion decisions  
25 165 will be solved with a third senior researcher. Endnote X9 software will be used to tract  
26 166 and manage the selection process, and there will be a PRISMA flow diagram to help  
27 167 demonstrate this process (see supplemental figure 1).

28  
29  
30  
31  
32  
33 168

### 34 169 **Data extraction**

35  
36  
37 170 A structured extraction sheet (see supplemental table 2) as well as Review Manager  
38 171 V.5.3 (Cochrane Collaboration, Oxford, UK) software will be used for data extractions  
39 172 by two investigators independently, and disagreement will be resolved by a third senior  
40 173 researcher. The included data items are as follows:

41  
42  
43 174 1. Publication and study details: authors, year of publication, country, study design, and  
44 175 number of participants.

45  
46  
47 176 2. Clinical characteristics: gestational age (GA), birth weight (BW), platelet count  
48 177 before transfusion or severity of thrombocytopenia, platelet count thresholds, type and  
49 178 dose of platelet component, and the number of PTs.

50  
51  
52 179 3. Outcomes: mortality, bleeding episodes, IVH grade, NEC, BPD, ROP, sepsis, and  
53 180 LOS.

1  
2  
3  
4 181 4. Other information: any sponsorship or funding.

5 182 Missing information will be handled by contacting relevant investigators for  
6  
7 183 unreported data or additional details.

8  
9 184

10  
11 185 **Risk of bias in individual studies**

12  
13 186 Risk of bias will be assessed by two independent reviewers, and disagreement will be  
14  
15 187 resolved by a third reviewer.

16  
17 188 For RCTs, the 'Risk of Bias Assessment Tool' in Review Manager V.5.3 software  
18  
19 189 (Cochrane Collaboration, UK) will be used. This tool includes random sequence  
20  
21 190 generation (selection bias), allocation concealment (selection bias), blinding of  
22  
23 191 participants and personnel (performance bias), blinding of outcome assessment  
24  
25 192 (detection bias), incomplete outcome data (attrition bias), selective reporting (reporting  
26  
27 193 bias), and other bias. The bias of the included studies will be divided into high risk of  
28  
29 194 bias, low risk of bias, or unclear in each domain (see supplemental table 3).<sup>40</sup>

30  
31 195 The Newcastle-Ottawa scale (NOS) will be used for observational studies in terms  
32  
33 196 of selection, comparability, and outcome, with a minimum score of 0 and a maximum  
34  
35 197 score of 9. We will grade trials with scores of 9 as high quality and those with scores  
36  
37 198 from 1-8 as low quality (see supplemental table 4).

38  
39 199

40  
41 200 **Data synthesis**

42  
43 201 When the studies are sufficiently homogeneous for any of the described outcome  
44  
45 202 measures, a quantitative synthesis (meta-analysis) may be performed according to the  
46  
47 203 recommendations of the Cochrane handbook. If quantitative analysis cannot be  
48  
49 204 performed, we will conduct a narrative systematic review of the results from the studies  
50  
51 205 included, and we will not pool the data from the individual studies.

52  
53 206 For dichotomous data (occurrence of mortality, bleeding episode, morbidity,  
54  
55 207 adverse events, etc.), the risk ratio (RR) and odds ratio (OR) will be used for analysis.  
56  
57 208 For continuous data (GA, BW, etc.), the mean difference (MD) or standardized mean  
58  
59 209 difference (SMD) with 95% confidence intervals (CIs) will be used to represent the

1  
2  
3  
4 210 summary statistics of the outcome with the same units and different scales, respectively.

5  
6 211

7  
8 212 **Assessment of heterogeneity**

9 213 The  $\chi^2$  test ( $P \leq 0.1$  indicates substantial or considerable heterogeneity) will be used to  
10  
11 214 determine whether heterogeneity is statistically significant. We will also assess the  
12  
13 215 degree of statistical heterogeneity by examining  $I^2$ . The data will be pooled by applying  
14  
15 216 a random-effects model following  $I^2 \geq 50\%$  or  $P \leq 0.1$ . Otherwise, the fixed-effects model  
16  
17 217 will be used.

18  
19 218

20  
21 219 **Sensitivity analysis**

22  
23 220 We will assess the robustness of the results by excluding low-quality studies.

24  
25 221

26  
27 222 **Subgroup analysis**

28  
29 223 If sufficient data are identified, subgroup analyses will be performed to detect possible  
30  
31 224 heterogeneity based on the following participant characteristics:

32  
33 225 1) GA (<28 w, 28 – 32 w, 32 – 37 w, >37 w)

34  
35 226 2) BW (<1000 g, 1000 – 1500 g, 1500 – 2500 g, >2500 g)

36  
37 227 3) The severity of thrombocytopenia [mild (100 000 – 150 000/ $\mu$ L), moderate (50 000  
38  
39 228 – 100 000/ $\mu$ L), severe (<50 000/ $\mu$ L)]

40  
41 229 4) The platelet count thresholds for PT

42  
43 230 5) The cause for thrombocytopenia

44  
45 231 6) The design of the study (RCTs, cohort studies)

46  
47 232 We will explore the possible heterogeneity among subgroups with  $I^2$  and P values.

48  
49 233

50  
51 234 **Quality of the evidence**

52  
53 235 We will use the GRADE approach<sup>36 40</sup> to assess the quality of evidence and propose to  
54  
55 236 present “Summary of findings” tables (see supplemental table 5).

56  
57 237

58  
59 238 **DISCUSSION**

60

1  
2  
3  
4 239 We will include RCTs and observational cohort studies in this review to strengthen the  
5  
6 240 statistical power because of the limited number of relevant studies. To the best of our  
7  
8 241 knowledge, this review will be the first to aim to determine the best transfusion platelet  
9  
10 242 threshold for thrombocytopenic neonates admitted to NICUs. We expect to provide the  
11  
12 243 best available evidence for neonatologists and guideline developers on PT, which will  
13  
14 244 help both clinical practice and further study design.

15 245

## 17 246 **ETHICS AND DISSEMINATION**

18  
19 247 Ethical approval is not required for this study because the data are from published  
20  
21 248 studies and will not include individual patient data. The results of this study are  
22  
23 249 anticipated to be published in a peer-reviewed journal.

24 250

### 27 251 **Contributors**

28  
29 252 TX contributed to the conception of the study. The framework of the systematic review  
30  
31 253 was developed by all authors. The search strategy was designed by TX and will be run  
32  
33 254 by YY and DJL, who will further independently screen the relevant records, extract  
34  
35 255 data from included studies and assess the risk of bias. JLW will perform the data  
36  
37 256 synthesis. TX and JT will arbitrate in cases of any disagreement and ensure no errors  
38  
39 257 occur during the study. The manuscript for this protocol was drafted by DJL and revised  
40  
41 258 by TX. All authors have approved the publication of this protocol.

### 42 259 **Funding**

43  
44 260 This work is supported by the National Science Foundation of China (No. 81300525 to  
45  
46 261 Tao Xiong), and the Fundamental Research Funds for the Central Universities (to Tao  
47  
48 262 Xiong).

### 50 263 **Competing interests**

51  
52 264 None declared.

### 54 265 **Patient consent**

55  
56 266 Not required.

57 267

268 **REFERENCES**

- 269 1. von Lindern JS, van den Bruele T, Lopriore E, et al. Thrombocytopenia in neonates and the  
270 risk of intraventricular hemorrhage: a retrospective cohort study. *BMC Pediatr*  
271 2011;11:16.
- 272 2. Roberts I, Stanworth S and Murray NA. Thrombocytopenia in the neonate. *Blood Rev*  
273 2008;22(4):173-86.
- 274 3. Resch E, Hinkas O, Urlesberger B, et al. Neonatal thrombocytopenia-causes and outcomes  
275 following platelet transfusions. *Eur J Pediatr* 2018;177(7):1045-1052.
- 276 4. Ree IMC, Fustolo-Gunnink SF, Bekker V, et al. Thrombocytopenia in neonatal sepsis:  
277 Incidence, severity and risk factors. *PLoS One* 2017;12(10):e0185581.
- 278 5. Dahmane Ayadi I, Ben Hamida E, Youssef A, et al. Prevalence and outcomes of  
279 thrombocytopenia in a neonatal intensive care unit. *Tunis Med* 2016;94(4):305-308.
- 280 6. Winkelhorst D and Oepkes D. Foetal and neonatal alloimmune thrombocytopenia. *Best*  
281 *Pract Res Clin Obstet Gynaecol* 2019;58:15-27.
- 282 7. Kamphuis MM, Paridaans NP, Porcelijn L, et al. Incidence and consequences of neonatal  
283 alloimmune thrombocytopenia: a systematic review. *Pediatrics* 2014;133(4):715-21.
- 284 8. Guida JD, Kunig AM, Leef KH, et al. Platelet count and sepsis in very low birth weight  
285 neonates: is there an organism-specific response? *Pediatrics* 2003;111(6 Pt 1):1411-5.
- 286 9. Bolat F, Kılıç SÇ, Oflaz MB, et al. The prevalence and outcomes of thrombocytopenia in a  
287 neonatal intensive care unit: a three-year report. *Pediatric hematology and oncology*  
288 2012;29(8):710-720.
- 289 10. Castle V, Andrew M, Kelton J, et al. Frequency and mechanism of neonatal  
290 thrombocytopenia. *The Journal of pediatrics* 1986;108(5 Pt 1):749-755.
- 291 11. Mehta P, Vasa R, Neumann L, et al. Thrombocytopenia in the high-risk infant. *The*  
292 *Journal of pediatrics* 1980;97(5):791-794.

- 1  
2  
3  
4 293 12. Ulusoy E, Tufekci O, Duman N, et al. Thrombocytopenia in neonates: causes and  
5  
6 294 outcomes. *Ann Hematol* 2013;92(7):961-7.  
7  
8 295 13. Andrew M, Vegh P, Caco C, et al. A randomized, controlled trial of platelet transfusions  
9  
10 296 in thrombocytopenic premature infants. *J Pediatr* 1993;123(2):285-91.  
11  
12  
13 297 14. Curley A, Stanworth SJ, Willoughby K, et al. Randomized Trial of Platelet-Transfusion  
14  
15 298 Thresholds in Neonates. *N Engl J Med* 2019;380(3):242-251.  
16  
17  
18 299 15. Borges JP, dos Santos AM, da Cunha DH, et al. Restrictive guideline reduces platelet  
19  
20 300 count thresholds for transfusions in very low birth weight preterm infants. *Vox Sang*  
21  
22 301 2013;104(3):207-13.  
23  
24 302 16. Girelli G, Antoncechi S, Casadei AM, et al. Recommendations for transfusion therapy in  
25  
26 303 neonatology. *Blood Transfus* 2015;13(3):484-97.  
27  
28  
29 304 17. New HV, Berryman J, Bolton-Maggs PH, et al. Guidelines on transfusion for fetuses,  
30  
31 305 neonates and older children. *Br J Haematol* 2016;175(5):784-828.  
32  
33 306 18. Lopriore E. Updates in Red Blood Cell and Platelet Transfusions in Preterm Neonates.  
34  
35 307 *Am J Perinatol* 2019;36(S 02):S37-S40.  
36  
37  
38 308 19. Del Vecchio A, Franco C, Petrillo F, et al. Neonatal Transfusion Practice: When do  
39  
40 309 Neonates Need Red Blood Cells or Platelets? *Am J Perinatol* 2016;33(11):1079-84.  
41  
42 310 20. Carr R, Kelly AM and Williamson LM. Neonatal thrombocytopenia and platelet  
43  
44 311 transfusion - a UK perspective. *Neonatology* 2015;107(1):1-7.  
45  
46  
47 312 21. Calhoun DA, Christensen RD, Edstrom CS, et al. Consistent approaches to procedures  
48  
49 313 and practices in neonatal hematology. *Clin Perinatol* 2000;27(3):733-53.  
50  
51 314 22. Sparger K, Deschmann E and Sola-Visner M. Platelet Transfusions in the Neonatal  
52  
53 315 Intensive Care Unit. *Clin Perinatol* 2015;42(3):613-23.  
54  
55  
56 316 23. Christensen RD, Carroll PD and Josephson CD. Evidence-based advances in transfusion  
57  
58 317 practice in neonatal intensive care units. *Neonatology* 2014;106(3):245-53.  
59  
60



- 1  
2  
3  
4 318 24. Baer VL, Lambert DK, Schmutz N, et al. Adherence to NICU transfusion guidelines: data  
5  
6 319 from a multihospital healthcare system. *J Perinatol* 2008;28(7):492-7.  
7  
8 320 25. Christensen RD, Paul DA, Sola-Visner MC, et al. Improving platelet transfusion practices  
9  
10 321 in the neonatal intensive care unit. *Transfusion* 2008;48(11):2281-4.  
11  
12  
13 322 26. Gibson BE, Todd A, Roberts I, et al. Transfusion guidelines for neonates and older  
14  
15 323 children. *Br J Haematol* 2004;124(4):433-53.  
16  
17  
18 324 27. Cremer M, Sallmon H, Kling PJ, et al. Thrombocytopenia and platelet transfusion in the  
19  
20 325 neonate. *Semin Fetal Neonatal Med* 2016;21(1):10-8.  
21  
22  
23 326 28. Fustolo-Gunnink SF, Huisman EJ, van der Bom JG, et al. Are thrombocytopenia and  
24  
25 327 platelet transfusions associated with major bleeding in preterm neonates? A systematic  
26  
27 328 review. *Blood Rev* 2019;36:1-9.  
28  
29 329 29. Kumar J, Dutta S, Sundaram V, et al. Platelet Transfusion for PDA Closure in Preterm  
30  
31 330 Infants: A Randomized Controlled Trial. *Pediatrics* 2019;143(5)  
32  
33 331 30. Haass KA, Sapiano MRP, Savinkina A, et al. Transfusion-Transmitted Infections  
34  
35 332 Reported to the National Healthcare Safety Network Hemovigilance Module. *Transfus*  
36  
37 333 *Med Rev* 2019;33(2):84-91.  
38  
39 334 31. Stolla M, Refaai MA, Heal JM, et al. Platelet transfusion - the new immunology of an old  
40  
41 335 therapy. *Front Immunol* 2015;6:28.  
42  
43  
44 336 32. Stainsby D, Jones H, Asher D, et al. Serious hazards of transfusion: a decade of  
45  
46 337 hemovigilance in the UK. *Transfus Med Rev* 2006;20(4):273-82.  
47  
48  
49 338 33. Shamseer L, Moher D, Clarke M, et al. Preferred reporting items for systematic review  
50  
51 339 and meta-analysis protocols (PRISMA-P) 2015: elaboration and explanation. *BMJ*  
52  
53 340 2015;350:g7647.  
54  
55 341 34. Higgins JPT, Thomas J, Chandler J, et al. Cochrane Handbook for Systematic Reviews of  
56  
57 342 Interventions . [Type]: Chichester (UK): John Wiley & Sons, 2019.  
58  
59  
60



- 1  
2  
3  
4 343 35. Moher D, Liberati A, Tetzlaff J, et al. Preferred reporting items for systematic reviews  
5  
6 344 and meta-analyses: the PRISMA statement. *Int J Surg* 2010;8(5):336-41.  
7  
8 345 36. Guyatt G, Oxman AD, Akl EA, et al. GRADE guidelines: 1. Introduction-GRADE  
9  
10 346 evidence profiles and summary of findings tables. *J Clin Epidemiol* 2011;64(4):383-94.  
11  
12  
13 347 37. Roberts JC, Javed MJ, Hocker JR, et al. Risk factors associated with intraventricular  
14  
15 348 hemorrhage in extremely premature neonates. *Blood Coagul Fibrinolysis* 2018;29(1):25-  
16  
17 349 29.  
18  
19 350 38. Sancak S, Toptan HH, Gokmen Yildirim T, et al. THROMBOCYTOPENIA AS A RISK  
20  
21 351 FACTOR FOR RETINOPATHY OF PREMATURITY. *Retina* 2019;39(4):706-711.  
22  
23  
24 352 39. Jensen AK, Ying GS, Huang J, et al. Longitudinal study of the association between  
25  
26 353 thrombocytopenia and retinopathy of prematurity. *J aapos* 2018;22(2):119-123.  
27  
28  
29 354 40. Higgins JPT, Altman DG, Gøtzsche PC, et al. The Cochrane Collaboration's tool for  
30  
31 355 assessing risk of bias in randomised trials. 2011;343:d5928.  
32  
33  
34  
35  
36  
37  
38  
39  
40  
41  
42  
43  
44  
45  
46  
47  
48  
49  
50  
51  
52  
53  
54  
55  
56  
57  
58  
59  
60

**Supplemental Figure 1. Flow Diagram of Studies Selected for Inclusion in the Systematic Review (PRISMA 2009 Flow Diagram)**

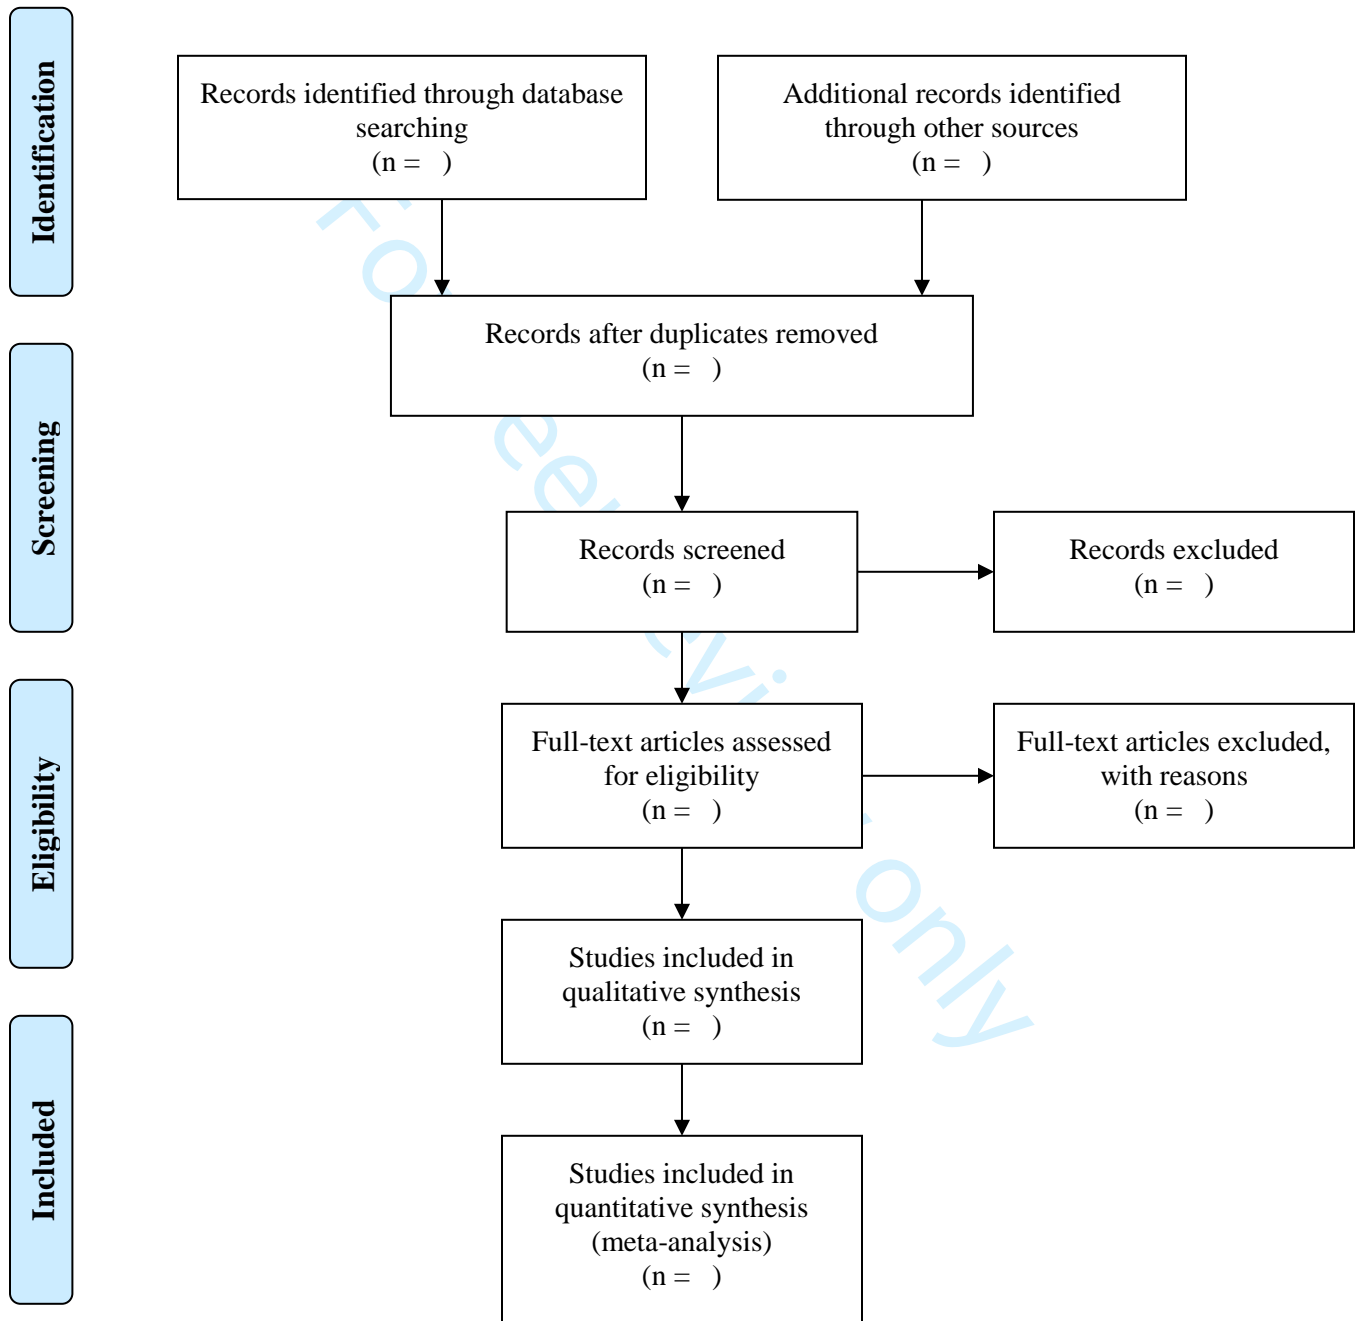

**Supplemental Table 1. Search Strategy**  
**(for Each Electronic Database to Be Searched)**

| #  | Search terms                           | No of records returned |
|----|----------------------------------------|------------------------|
| 1  | infant                                 |                        |
| 2  | newborn                                |                        |
| 3  | neonatal                               |                        |
| 4  | neonate                                |                        |
| 5  | preterm                                |                        |
| 6  | premature                              |                        |
| 7  | neonatology                            |                        |
| 8  | #1 OR #2 OR #3 OR #4 OR #5 OR #6 OR #7 |                        |
| 9  | thrombocytopenia                       |                        |
| 10 | thrombocytopenic                       |                        |
| 11 | NT                                     |                        |
| 12 | #9 OR #10 OR #11                       |                        |
| 13 | platelet transfusion                   |                        |
| 14 | platelet infusion therapy              |                        |
| 15 | platelet administration                |                        |
| 16 | PT                                     |                        |
| 17 | #13 OR #14 OR #15 OR #16               |                        |
| 18 | #8 AND #12 AND #17                     |                        |
| 19 | limit #18 to humans                    |                        |

**Supplemental Table 2. Data Extraction Sheet**

| Publication and study details                          |                                                                             |                     |               |                                                                             |                     |               |
|--------------------------------------------------------|-----------------------------------------------------------------------------|---------------------|---------------|-----------------------------------------------------------------------------|---------------------|---------------|
| Authors                                                |                                                                             |                     |               |                                                                             |                     |               |
| Year of publication                                    |                                                                             |                     |               |                                                                             |                     |               |
| Country                                                |                                                                             |                     |               |                                                                             |                     |               |
| Study design                                           |                                                                             |                     |               |                                                                             |                     |               |
| Number of participants                                 |                                                                             |                     |               |                                                                             |                     |               |
| Groups                                                 | Group 1 platelet count threshold<br>(*10 <sup>3</sup> per cubic millimeter) |                     |               | Group 2 platelet count threshold<br>(*10 <sup>3</sup> per cubic millimeter) |                     |               |
|                                                        |                                                                             |                     |               |                                                                             |                     |               |
| Clinical characteristics                               |                                                                             |                     |               |                                                                             |                     |               |
|                                                        | Group 1 median (or mean)                                                    | Group 1 IQR (or SD) | Group 1 total | Group 2 median (or mean)                                                    | Group 2 IQR (or SD) | Group 2 total |
| GA (w)                                                 |                                                                             |                     |               |                                                                             |                     |               |
| BW (g)                                                 |                                                                             |                     |               |                                                                             |                     |               |
| Platelet count (*10 <sup>3</sup> per cubic millimeter) |                                                                             |                     |               |                                                                             |                     |               |
| Number of platelet transfusions                        |                                                                             |                     |               |                                                                             |                     |               |
| Primary outcomes                                       |                                                                             |                     |               |                                                                             |                     |               |
|                                                        | Group 1 event                                                               | Group 1 total       | Group 2 event | Group 2 total                                                               |                     |               |
| In-hospital mortality or major bleeding                |                                                                             |                     |               |                                                                             |                     |               |
| Bleeding episodes                                      |                                                                             |                     |               |                                                                             |                     |               |
| IVH                                                    |                                                                             |                     |               |                                                                             |                     |               |
| ICH                                                    |                                                                             |                     |               |                                                                             |                     |               |
| PH                                                     |                                                                             |                     |               |                                                                             |                     |               |

|                                     |                          |                     |               |                          |                     |               |
|-------------------------------------|--------------------------|---------------------|---------------|--------------------------|---------------------|---------------|
| Frank rectal bleeding               |                          |                     |               |                          |                     |               |
| Other bleeding                      |                          |                     |               |                          |                     |               |
| <b>Secondary outcomes</b>           |                          |                     |               |                          |                     |               |
| <b>Major morbidity</b>              |                          |                     |               |                          |                     |               |
|                                     | Group 1 event            | Group 1 total       | Group 2 event | Group 2 total            |                     |               |
| PDA                                 |                          |                     |               |                          |                     |               |
| BPD                                 |                          |                     |               |                          |                     |               |
| Sepsis                              |                          |                     |               |                          |                     |               |
| NEC                                 |                          |                     |               |                          |                     |               |
| ROP                                 |                          |                     |               |                          |                     |               |
| <b>Other outcome measures</b>       |                          |                     |               |                          |                     |               |
| LOS (days)                          | Group 1 median (or mean) | Group 1 IQR (or SD) | Group 1 total | Group 2 median (or mean) | Group 2 IQR (or SD) | Group 2 total |
|                                     |                          |                     |               |                          |                     |               |
| Adverse effects of transfusion      | Group 1 event            | Group 1 total       | Group 2 event | Group 2 total            |                     |               |
|                                     |                          |                     |               |                          |                     |               |
| <b>Other information</b>            |                          |                     |               |                          |                     |               |
| Type and dose of platelet component |                          |                     |               |                          |                     |               |
| Any sponsorship or funding          |                          |                     |               |                          |                     |               |

IQR: interquartile range; SD: standard deviation; GA: gestational age; BW: birth weight; IVH: intraventricular haemorrhage; ICH: intracranial haemorrhage; PH: pulmonary haemorrhage; BPD: bronchopulmonary dysplasia; NEC: necrotizing enterocolitis; PDA: patent ductus arteriosus; NEC: necrotizing enterocolitis; ROP: retinopathy of prematurity; LOS: length of stay

**Supplemental Table 3. The Risk of Bias Assessment Tool for Randomized  
Controlled Studies**

**Supplemental Table 3.1 The Risk of Bias Table**

| <b>Item</b>                                                      | <b>Judgement</b> | <b>Support for judgement</b> |
|------------------------------------------------------------------|------------------|------------------------------|
| <b>Random sequence generation (selection bias)</b>               |                  |                              |
| <b>Allocation concealment (selection bias)</b>                   |                  |                              |
| <b>Blinding of participants and personnel (performance bias)</b> |                  |                              |
| <b>Blinding of outcome assessment (detection bias)</b>           |                  |                              |
| <b>Incomplete outcome data addressed (attrition bias)</b>        |                  |                              |
| <b>Selective reporting (reporting bias)</b>                      |                  |                              |
| <b>Other bias</b>                                                |                  |                              |

**Supplemental Table 3.2 The Recommended List of Items in the Risk of Bias Tool**

| <b>Bias domain</b> | <b>Source of bias</b>                   | <b>Support for judgment</b>                                                                                                                                                                           | <b>Review authors' judgment (assess as low, unclear or high risk of bias)</b>                                      |
|--------------------|-----------------------------------------|-------------------------------------------------------------------------------------------------------------------------------------------------------------------------------------------------------|--------------------------------------------------------------------------------------------------------------------|
| Selection bias     | Random sequence generation              | Describe the method used to generate the allocation sequence in sufficient detail to allow an assessment of whether it should produce comparable groups                                               | Selection bias (biased allocation to interventions) due to inadequate generation of a randomised sequence          |
|                    | Allocation concealment                  | Describe the method used to conceal the allocation sequence in sufficient detail to determine whether intervention allocations could have been foreseen before or during enrolment                    | Selection bias (biased allocation to interventions) due to inadequate concealment of allocations before assignment |
| Performance bias   | Blinding of participants and personnel* | Describe all measures used, if any, to blind trial participants and researchers from knowledge of which intervention a participant received. Provide any information relating to whether the intended | Performance bias due to knowledge of the allocated interventions by participants and personnel during the study    |

|                |                                 |                                                                                                                                                                                                                                                                    |                                                                                      |
|----------------|---------------------------------|--------------------------------------------------------------------------------------------------------------------------------------------------------------------------------------------------------------------------------------------------------------------|--------------------------------------------------------------------------------------|
|                |                                 | blinding was effective                                                                                                                                                                                                                                             |                                                                                      |
| Detection bias | Blinding of outcome assessment* | Describe all measures used, if any, to blind outcome assessment from knowledge of which intervention a participant received. Provide any information relating to whether the intended blinding was effective                                                       | Detection bias due to knowledge of the allocated interventions by outcome assessment |
| Attrition bias | Incomplete outcome data*        | Describe the completeness of outcome data for each main outcome, including attrition and exclusions from the analysis. State whether attrition and exclusions were reported, the numbers in each intervention group (compared with total randomised participants), | Attrition bias due to amount, nature, or handling of incomplete outcome data         |



|                |                                     |                                                                                                     |                                                   |
|----------------|-------------------------------------|-----------------------------------------------------------------------------------------------------|---------------------------------------------------|
|                |                                     | reasons for attrition or exclusions where reported, and any reinclusions in analyses for the review |                                                   |
| Reporting bias | Selective reporting                 | State how selective outcome reporting was examined and what was found                               | Reporting bias due to selective outcome reporting |
| Other bias     | Anything else, ideally prespecified | State any important concerns about bias not covered in the other domains in the tool                | Bias due to problems not covered elsewhere        |

\*Assessments should be made for each main outcome or class of outcomes.

**Supplemental Table 3.3 Approach to Formulating Summary Assessments of Risk of Bias for Each Important Outcome (Across Domains) within and Across Trials**

| <b>Risk of bias</b>  | <b>Interpretation</b>                                        | <b>Within a trial</b>                           | <b>Across trials</b>                                                                                                 |
|----------------------|--------------------------------------------------------------|-------------------------------------------------|----------------------------------------------------------------------------------------------------------------------|
| Low risk of bias     | Bias, if present, is unlikely to alter the results seriously | Low risk of bias for all key domains            | Most information is from trials at low risk of bias                                                                  |
| Unclear risk of bias | A risk of bias that raises some doubt about the results      | Low or unclear risk of bias for all key domains | Most information is from trials at low or unclear risk of bias                                                       |
| High risk of bias    | Bias may alter the results seriously                         | High risk of bias for one or more key domains   | The proportion of information from trials at high risk of bias is sufficient to affect the interpretation of results |

**Supplemental Table 4. The Newcastle-Ottawa Scale (NOS)**

**Supplemental Table 4.1 The Newcastle-Ottawa Scale (NOS) – for Cohort Studies**

| Study | Item & score                                 |                                         |                               |                                                                              |                                                                       |                           |                                                     |                                      |
|-------|----------------------------------------------|-----------------------------------------|-------------------------------|------------------------------------------------------------------------------|-----------------------------------------------------------------------|---------------------------|-----------------------------------------------------|--------------------------------------|
|       | Selection                                    |                                         |                               |                                                                              | Comparability                                                         | Outcome                   |                                                     |                                      |
|       | Representativeness of the exposed cohort (1) | Selection of the non-exposed cohort (1) | Ascertainment of exposure (1) | Demonstration that outcome of interest was not present at start of study (1) | Compare ability of cohorts on the basis of the design or analysis (2) | Assessment of outcome (1) | Was follow up long enough for outcomes to occur (1) | Adequacy of follow up of cohorts (1) |
|       |                                              |                                         |                               |                                                                              |                                                                       |                           |                                                     |                                      |
|       |                                              |                                         |                               |                                                                              |                                                                       |                           |                                                     |                                      |
|       |                                              |                                         |                               |                                                                              |                                                                       |                           |                                                     |                                      |
|       |                                              |                                         |                               |                                                                              |                                                                       |                           |                                                     |                                      |
|       |                                              |                                         |                               |                                                                              |                                                                       |                           |                                                     |                                      |
|       |                                              |                                         |                               |                                                                              |                                                                       |                           |                                                     |                                      |
|       |                                              |                                         |                               |                                                                              |                                                                       |                           |                                                     |                                      |

## Supplemental 4.2 NEWCASTLE - OTTAWA QUALITY ASSESSMENT SCALE COHORT STUDIES

Note: A study can be awarded a maximum of one star for each numbered item within the Selection and Outcome categories. A maximum of two stars can be given for Comparability

### Selection

#### 1) Representativeness of the exposed cohort

- a) truly representative of the average \_\_\_\_\_ (describe) in the community \*
- b) somewhat representative of the average \_\_\_\_\_ in the community \*
- c) selected group of users eg nurses, volunteers
- d) no description of the derivation of the cohort

#### 2) Selection of the non exposed cohort

- a) drawn from the same community as the exposed cohort \*
- b) drawn from a different source
- c) no description of the derivation of the non exposed cohort

#### 3) Ascertainment of exposure

- a) secure record (eg surgical records) \*
- b) structured interview \*
- c) written self report
- d) no description

#### 4) Demonstration that outcome of interest was not present at start of study

- a) yes \*
- b) no

### Comparability

#### 1) Comparability of cohorts on the basis of the design or analysis

- a) study controls for \_\_\_\_\_ (select the most important factor) \*
- b) study controls for any additional factor \* (This criteria could be modified to indicate specific control for a second important factor.)

### Outcome

#### 1) Assessment of outcome

- a) independent blind assessment \*
- b) record linkage \*
- c) self report
- d) no description

#### 2) Was follow-up long enough for outcomes to occur

- a) yes (select an adequate follow up period for outcome of interest) \*
- b) no

#### 3) Adequacy of follow up of cohorts

- a) complete follow up - all subjects accounted for \*
- b) subjects lost to follow up unlikely to introduce bias - small number lost - > \_\_\_\_ % (select an adequate %) follow up, or description provided of those lost) \*
- c) follow up rate < \_\_\_\_ % (select an adequate %) and no description of those lost
- d) no statement

**Supplemental Table 5. The Grading of Recommendations Assessment,  
Development and Evaluation (GRADE) Approach**

**Supplemental Table 5.1 The Summary of Findings Table**

| Outcomes | Illustrate comparative risks<br>(95% CI) |                               | Relative<br>effect<br>(95% CI) | No of<br>Participants<br>(studies)<br>Follow up | Quality of<br>the<br>evidence<br>(GRADE) | Overall<br>results |
|----------|------------------------------------------|-------------------------------|--------------------------------|-------------------------------------------------|------------------------------------------|--------------------|
|          | Assumed risk<br>Group 1                  | Corresponding risk<br>Group 2 |                                |                                                 |                                          |                    |
|          |                                          |                               |                                |                                                 |                                          |                    |
|          |                                          |                               |                                |                                                 |                                          |                    |
|          |                                          |                               |                                |                                                 |                                          |                    |
|          |                                          |                               |                                |                                                 |                                          |                    |

**Supplemental Table 5.2 GRADE Evidence Profile**

| Quality assessment |        |                    |               |              |             |                         | No. of patients |         | Effect                  | Quality |
|--------------------|--------|--------------------|---------------|--------------|-------------|-------------------------|-----------------|---------|-------------------------|---------|
| No. of<br>studies  | Design | Risk<br>of<br>bias | Inconsistency | Indirectness | Imprecision | Other<br>considerations | Group<br>1      | Group 2 | Relative<br>(95%<br>CI) |         |
| Outcome 1          |        |                    |               |              |             |                         |                 |         |                         |         |
|                    |        |                    |               |              |             |                         |                 |         |                         |         |
| Outcome 2          |        |                    |               |              |             |                         |                 |         |                         |         |
|                    |        |                    |               |              |             |                         |                 |         |                         |         |
| Outcome 3          |        |                    |               |              |             |                         |                 |         |                         |         |
|                    |        |                    |               |              |             |                         |                 |         |                         |         |
| Outcome 4          |        |                    |               |              |             |                         |                 |         |                         |         |
|                    |        |                    |               |              |             |                         |                 |         |                         |         |

**Supplemental Table 5.3 Quality of Evidence Grades**

| Grade    | Definition                                                                                                                                                                             |
|----------|----------------------------------------------------------------------------------------------------------------------------------------------------------------------------------------|
| High     | We are very confident that the true effect lies close to that of the estimate of the effect.                                                                                           |
| Moderate | We are moderately confident in the effect estimate: The true effect is likely to be close to the estimate of the effect, but there is a possibility that it is substantially different |
| Low      | Our confidence in the effect estimate is limited: The true effect may be substantially different from the estimate of the effect.                                                      |
| Very Low | We have very little confidence in the effect estimate: The true effect is likely to be substantially different from the estimate of effect                                             |

**Supplemental Table 5.4 Factors that can reduce the quality of the evidence**

| Factor                                                  | Consequence     |
|---------------------------------------------------------|-----------------|
| Limitations in study design or execution (risk of bias) | ↓ 1 or 2 levels |
| Inconsistency of results                                | ↓ 1 or 2 levels |
| Indirectness of evidence                                | ↓ 1 or 2 levels |
| Imprecision                                             | ↓ 1 or 2 levels |
| Publication bias                                        | ↓ 1 or 2 levels |

**Supplemental Table 5.5 Factors that can increase the quality of the evidence**

| Factor                                                                                                          | Consequence     |
|-----------------------------------------------------------------------------------------------------------------|-----------------|
| Large magnitude of effect                                                                                       | ↑ 1 or 2 levels |
| All plausible confounding would reduce the demonstrated effect or increase the effect if no effect was observed | ↑ 1 level       |
| Dose-response gradient                                                                                          | ↑ 1 level       |

# Reporting checklist for protocol of a systematic review.

Based on the PRISMA-P guidelines.

## Instructions to authors

Complete this checklist by entering the page numbers from your manuscript where readers will find each of the items listed below.

Your article may not currently address all the items on the checklist. Please modify your text to include the missing information. If you are certain that an item does not apply, please write "n/a" and provide a short explanation.

Upload your completed checklist as an extra file when you submit to a journal.

In your methods section, say that you used the PRISMA-Preporting guidelines, and cite them as:

Moher D, Shamseer L, Clarke M, Ghersi D, Liberati A, Petticrew M, Shekelle P, Stewart LA. Preferred Reporting Items for Systematic Review and Meta-Analysis Protocols (PRISMA-P) 2015 statement. Syst Rev. 2015;4(1):1.

|                     |                     | Reporting Item                                                                                                                            | Page Number         |
|---------------------|---------------------|-------------------------------------------------------------------------------------------------------------------------------------------|---------------------|
| <b>Title</b>        |                     |                                                                                                                                           |                     |
| Identification      | <a href="#">#1a</a> | Identify the report as a protocol of a systematic review                                                                                  | 1                   |
| Update              | <a href="#">#1b</a> | If the protocol is for an update of a previous systematic review, identify as such                                                        | 2                   |
| <b>Registration</b> |                     |                                                                                                                                           |                     |
|                     | <a href="#">#2</a>  | If registered, provide the name of the registry (such as PROSPERO) and registration number                                                | n/a<br>under review |
| <b>Authors</b>      |                     |                                                                                                                                           |                     |
| Contact             | <a href="#">#3a</a> | Provide name, institutional affiliation, e-mail address of all protocol authors; provide physical mailing address of corresponding author | 1                   |

|    |                           |                     |                                                                                                                                                                                                                               |     |
|----|---------------------------|---------------------|-------------------------------------------------------------------------------------------------------------------------------------------------------------------------------------------------------------------------------|-----|
| 1  | Contribution              | <a href="#">#3b</a> | Describe contributions of protocol authors and identify the guarantor of the review                                                                                                                                           | 10  |
| 2  |                           |                     |                                                                                                                                                                                                                               |     |
| 3  |                           |                     |                                                                                                                                                                                                                               |     |
| 4  |                           |                     |                                                                                                                                                                                                                               |     |
| 5  | <b>Amendments</b>         |                     |                                                                                                                                                                                                                               |     |
| 6  |                           |                     |                                                                                                                                                                                                                               |     |
| 7  |                           | <a href="#">#4</a>  | If the protocol represents an amendment of a previously completed or published protocol, identify as such and list changes; otherwise, state plan for documenting important protocol amendments                               | 2   |
| 8  |                           |                     |                                                                                                                                                                                                                               |     |
| 9  |                           |                     |                                                                                                                                                                                                                               |     |
| 10 |                           |                     |                                                                                                                                                                                                                               |     |
| 11 |                           |                     |                                                                                                                                                                                                                               |     |
| 12 |                           |                     |                                                                                                                                                                                                                               |     |
| 13 |                           |                     |                                                                                                                                                                                                                               |     |
| 14 | <b>Support</b>            |                     |                                                                                                                                                                                                                               |     |
| 15 |                           |                     |                                                                                                                                                                                                                               |     |
| 16 | Sources                   | <a href="#">#5a</a> | Indicate sources of financial or other support for the review                                                                                                                                                                 | 1   |
| 17 |                           |                     |                                                                                                                                                                                                                               |     |
| 18 | Sponsor                   | <a href="#">#5b</a> | Provide name for the review funder and / or sponsor                                                                                                                                                                           | 1   |
| 19 |                           |                     |                                                                                                                                                                                                                               |     |
| 20 |                           |                     |                                                                                                                                                                                                                               |     |
| 21 | Role of sponsor or funder | <a href="#">#5c</a> | Describe roles of funder(s), sponsor(s), and / or institution(s), if any, in developing the protocol                                                                                                                          | 1   |
| 22 |                           |                     |                                                                                                                                                                                                                               |     |
| 23 |                           |                     |                                                                                                                                                                                                                               |     |
| 24 |                           |                     |                                                                                                                                                                                                                               |     |
| 25 | <b>Introduction</b>       |                     |                                                                                                                                                                                                                               |     |
| 26 |                           |                     |                                                                                                                                                                                                                               |     |
| 27 | Rationale                 | <a href="#">#6</a>  | Describe the rationale for the review in the context of what is already known                                                                                                                                                 | 4-5 |
| 28 |                           |                     |                                                                                                                                                                                                                               |     |
| 29 |                           |                     |                                                                                                                                                                                                                               |     |
| 30 |                           |                     |                                                                                                                                                                                                                               |     |
| 31 | Objectives                | <a href="#">#7</a>  | Provide an explicit statement of the question(s) the review will address with reference to participants, interventions, comparators, and outcomes (PICO)                                                                      | 5   |
| 32 |                           |                     |                                                                                                                                                                                                                               |     |
| 33 |                           |                     |                                                                                                                                                                                                                               |     |
| 34 |                           |                     |                                                                                                                                                                                                                               |     |
| 35 |                           |                     |                                                                                                                                                                                                                               |     |
| 36 | <b>Methods</b>            |                     |                                                                                                                                                                                                                               |     |
| 37 |                           |                     |                                                                                                                                                                                                                               |     |
| 38 | Eligibility criteria      | <a href="#">#8</a>  | Specify the study characteristics (such as PICO, study design, setting, time frame) and report characteristics (such as years considered, language, publication status) to be used as criteria for eligibility for the review | 6-7 |
| 39 |                           |                     |                                                                                                                                                                                                                               |     |
| 40 |                           |                     |                                                                                                                                                                                                                               |     |
| 41 |                           |                     |                                                                                                                                                                                                                               |     |
| 42 |                           |                     |                                                                                                                                                                                                                               |     |
| 43 |                           |                     |                                                                                                                                                                                                                               |     |
| 44 |                           |                     |                                                                                                                                                                                                                               |     |
| 45 | Information sources       | <a href="#">#9</a>  | Describe all intended information sources (such as electronic databases, contact with study authors, trial registers or other grey literature sources) with planned dates of coverage                                         | 5-6 |
| 46 |                           |                     |                                                                                                                                                                                                                               |     |
| 47 |                           |                     |                                                                                                                                                                                                                               |     |
| 48 |                           |                     |                                                                                                                                                                                                                               |     |
| 49 |                           |                     |                                                                                                                                                                                                                               |     |
| 50 |                           |                     |                                                                                                                                                                                                                               |     |
| 51 |                           |                     |                                                                                                                                                                                                                               |     |
| 52 | Search strategy           | <a href="#">#10</a> | Present draft of search strategy to be used for at least one electronic database, including planned limits, such that it could be repeated                                                                                    | 5-6 |
| 53 |                           |                     |                                                                                                                                                                                                                               |     |
| 54 |                           |                     |                                                                                                                                                                                                                               |     |
| 55 |                           |                     |                                                                                                                                                                                                                               |     |
| 56 |                           |                     |                                                                                                                                                                                                                               |     |
| 57 |                           |                     |                                                                                                                                                                                                                               |     |
| 58 |                           |                     |                                                                                                                                                                                                                               |     |
| 59 |                           |                     |                                                                                                                                                                                                                               |     |
| 60 |                           |                     |                                                                                                                                                                                                                               |     |



|    |                    |                      |                                                                                 |     |
|----|--------------------|----------------------|---------------------------------------------------------------------------------|-----|
| 1  | Study records -    | <a href="#">#11a</a> | Describe the mechanism(s) that will be used to manage                           | 7   |
| 2  | data management    |                      | records and data throughout the review                                          |     |
| 3  |                    |                      |                                                                                 |     |
| 4  | Study records -    | <a href="#">#11b</a> | State the process that will be used for selecting studies                       | 7   |
| 5  | selection process  |                      | (such as two independent reviewers) through each phase                          |     |
| 6  |                    |                      | of the review (that is, screening, eligibility and inclusion in                 |     |
| 7  |                    |                      | meta-analysis)                                                                  |     |
| 8  |                    |                      |                                                                                 |     |
| 9  |                    |                      |                                                                                 |     |
| 10 |                    |                      |                                                                                 |     |
| 11 | Study records -    | <a href="#">#11c</a> | Describe planned method of extracting data from reports                         | 7-8 |
| 12 | data collection    |                      | (such as piloting forms, done independently, in duplicate),                     |     |
| 13 | process            |                      | any processes for obtaining and confirming data from                            |     |
| 14 |                    |                      | investigators                                                                   |     |
| 15 |                    |                      |                                                                                 |     |
| 16 |                    |                      |                                                                                 |     |
| 17 |                    |                      |                                                                                 |     |
| 18 | Data items         | <a href="#">#12</a>  | List and define all variables for which data will be sought                     | 7-8 |
| 19 |                    |                      | (such as PICO items, funding sources), any pre-planned                          |     |
| 20 |                    |                      | data assumptions and simplifications                                            |     |
| 21 |                    |                      |                                                                                 |     |
| 22 |                    |                      |                                                                                 |     |
| 23 | Outcomes and       | <a href="#">#13</a>  | List and define all outcomes for which data will be sought,                     | 6-7 |
| 24 | prioritization     |                      | including prioritization of main and additional outcomes,                       |     |
| 25 |                    |                      | with rationale                                                                  |     |
| 26 |                    |                      |                                                                                 |     |
| 27 |                    |                      |                                                                                 |     |
| 28 |                    |                      |                                                                                 |     |
| 29 | Risk of bias in    | <a href="#">#14</a>  | Describe anticipated methods for assessing risk of bias of                      | 8   |
| 30 | individual studies |                      | individual studies, including whether this will be done at the                  |     |
| 31 |                    |                      | outcome or study level, or both; state how this information                     |     |
| 32 |                    |                      | will be used in data synthesis                                                  |     |
| 33 |                    |                      |                                                                                 |     |
| 34 |                    |                      |                                                                                 |     |
| 35 |                    |                      |                                                                                 |     |
| 36 | Data synthesis     | <a href="#">#15a</a> | Describe criteria under which study data will be                                | 8-9 |
| 37 |                    |                      | quantitatively synthesised                                                      |     |
| 38 |                    |                      |                                                                                 |     |
| 39 |                    |                      |                                                                                 |     |
| 40 | Data synthesis     | <a href="#">#15b</a> | If data are appropriate for quantitative synthesis, describe                    | 8-9 |
| 41 |                    |                      | planned summary measures, methods of handling data and                          |     |
| 42 |                    |                      | methods of combining data from studies, including any                           |     |
| 43 |                    |                      | planned exploration of consistency (such as I <sup>2</sup> , Kendall's $\tau$ ) |     |
| 44 |                    |                      |                                                                                 |     |
| 45 |                    |                      |                                                                                 |     |
| 46 | Data synthesis     | <a href="#">#15c</a> | Describe any proposed additional analyses (such as                              | 9   |
| 47 |                    |                      | sensitivity or subgroup analyses, meta-regression)                              |     |
| 48 |                    |                      |                                                                                 |     |
| 49 |                    |                      |                                                                                 |     |
| 50 | Data synthesis     | <a href="#">#15d</a> | If quantitative synthesis is not appropriate, describe the                      | 8   |
| 51 |                    |                      | type of summary planned                                                         |     |
| 52 |                    |                      |                                                                                 |     |
| 53 |                    |                      |                                                                                 |     |
| 54 | Meta-bias(es)      | <a href="#">#16</a>  | Specify any planned assessment of meta-bias(es) (such as                        | 9   |
| 55 |                    |                      | publication bias across studies, selective reporting within                     |     |
| 56 |                    |                      | studies)                                                                        |     |
| 57 |                    |                      |                                                                                 |     |
| 58 |                    |                      |                                                                                 |     |
| 59 |                    |                      |                                                                                 |     |
| 60 |                    |                      |                                                                                 |     |

1 Confidence in [#17](#) Describe how the strength of the body of evidence will be 9  
2 cumulative assessed (such as GRADE)  
3 evidence  
4  
5

6 None The PRISMA-P checklist is distributed under the terms of the Creative Commons Attribution  
7 License CC-BY 4.0. This checklist can be completed online using <https://www.goodreports.org/>, a tool  
8 made by the [EQUATOR Network](#) in collaboration with [Penelope.ai](#)  
9  
10  
11  
12  
13  
14  
15  
16  
17  
18  
19  
20  
21  
22  
23  
24  
25  
26  
27  
28  
29  
30  
31  
32  
33  
34  
35  
36  
37  
38  
39  
40  
41  
42  
43  
44  
45  
46  
47  
48  
49  
50  
51  
52  
53  
54  
55  
56  
57  
58  
59  
60

# BMJ Open

## Platelet Transfusion for Neonates with Thrombocytopenia: Protocol for a Systematic Review

|                                 |                                                                                                                                                                                                                                                                                                                                                                                                                                                                                                                                                                                                                                                                                                                                                                                                                                                                                                                                                                                               |
|---------------------------------|-----------------------------------------------------------------------------------------------------------------------------------------------------------------------------------------------------------------------------------------------------------------------------------------------------------------------------------------------------------------------------------------------------------------------------------------------------------------------------------------------------------------------------------------------------------------------------------------------------------------------------------------------------------------------------------------------------------------------------------------------------------------------------------------------------------------------------------------------------------------------------------------------------------------------------------------------------------------------------------------------|
| Journal:                        | <i>BMJ Open</i>                                                                                                                                                                                                                                                                                                                                                                                                                                                                                                                                                                                                                                                                                                                                                                                                                                                                                                                                                                               |
| Manuscript ID                   | bmjopen-2020-039132.R1                                                                                                                                                                                                                                                                                                                                                                                                                                                                                                                                                                                                                                                                                                                                                                                                                                                                                                                                                                        |
| Article Type:                   | Protocol                                                                                                                                                                                                                                                                                                                                                                                                                                                                                                                                                                                                                                                                                                                                                                                                                                                                                                                                                                                      |
| Date Submitted by the Author:   | 17-Aug-2020                                                                                                                                                                                                                                                                                                                                                                                                                                                                                                                                                                                                                                                                                                                                                                                                                                                                                                                                                                                   |
| Complete List of Authors:       | Liu, Dengjun; Sichuan University West China Second University Hospital, Department of Pediatrics<br>Wu, Jinlin; Sichuan University West China Second University Hospital, Department of Pediatrics; Sichuan University, Key Laboratory of Birth Defects and Related Diseases of Women and Children Ministry of Education<br>Xiong, tao; Sichuan University West China Second University Hospital, Department of Pediatrics; Sichuan University, Key Laboratory of Birth Defects and Related Diseases of Women and Children Ministry of Education<br>Yue, Yan; Sichuan University West China Second University Hospital, Department of Pediatrics; Sichuan University, Key Laboratory of Birth Defects and Related Diseases of Women and Children Ministry of Education<br>Tang, Jun; Sichuan University West China Second University Hospital, Department of Pediatrics; Sichuan University, Key Laboratory of Birth Defects and Related Diseases of Women and Children Ministry of Education |
| <b>Primary Subject Heading</b>: | Paediatrics                                                                                                                                                                                                                                                                                                                                                                                                                                                                                                                                                                                                                                                                                                                                                                                                                                                                                                                                                                                   |
| Secondary Subject Heading:      | Haematology (incl blood transfusion), Intensive care                                                                                                                                                                                                                                                                                                                                                                                                                                                                                                                                                                                                                                                                                                                                                                                                                                                                                                                                          |
| Keywords:                       | Blood bank & transfusion medicine < HAEMATOLOGY, Bleeding disorders & coagulopathies < HAEMATOLOGY, Neonatal intensive & critical care < INTENSIVE & CRITICAL CARE                                                                                                                                                                                                                                                                                                                                                                                                                                                                                                                                                                                                                                                                                                                                                                                                                            |
|                                 |                                                                                                                                                                                                                                                                                                                                                                                                                                                                                                                                                                                                                                                                                                                                                                                                                                                                                                                                                                                               |

SCHOLARONE™  
Manuscripts



I, the Submitting Author has the right to grant and does grant on behalf of all authors of the Work (as defined in the below author licence), an exclusive licence and/or a non-exclusive licence for contributions from authors who are: i) UK Crown employees; ii) where BMJ has agreed a CC-BY licence shall apply, and/or iii) in accordance with the terms applicable for US Federal Government officers or employees acting as part of their official duties; on a worldwide, perpetual, irrevocable, royalty-free basis to BMJ Publishing Group Ltd ("BMJ") its licensees and where the relevant Journal is co-owned by BMJ to the co-owners of the Journal, to publish the Work in this journal and any other BMJ products and to exploit all rights, as set out in our [licence](#).

The Submitting Author accepts and understands that any supply made under these terms is made by BMJ to the Submitting Author unless you are acting as an employee on behalf of your employer or a postgraduate student of an affiliated institution which is paying any applicable article publishing charge ("APC") for Open Access articles. Where the Submitting Author wishes to make the Work available on an Open Access basis (and intends to pay the relevant APC), the terms of reuse of such Open Access shall be governed by a Creative Commons licence – details of these licences and which [Creative Commons](#) licence will apply to this Work are set out in our licence referred to above.

Other than as permitted in any relevant BMJ Author's Self Archiving Policies, I confirm this Work has not been accepted for publication elsewhere, is not being considered for publication elsewhere and does not duplicate material already published. I confirm all authors consent to publication of this Work and authorise the granting of this licence.

1  
2  
3  
4 1 **Platelet Transfusion for Neonates with Thrombocytopenia: Protocol for a**  
5  
6 2 **Systematic Review**

7 3 Dengjun Liu<sup>1,2#</sup>, MD; Jinlin Wu<sup>1,2#</sup>, MD, PhD; Tao Xiong<sup>1,2\*</sup>, MD, PhD; Yan Yue<sup>1,2</sup>,  
8  
9 4 MD; and Jun Tang<sup>1,2</sup>, MD, PhD

10  
11 5  
12 6 <sup>1</sup> Department of Pediatrics, West China Second University Hospital, Sichuan  
13  
14 University, Chengdu, China

15 7  
16 8 <sup>2</sup> Key Laboratory of Birth Defects and Related Diseases of Women and Children (Sichuan  
17  
18 University) Ministry of Education

19 9  
20 10 Dengjun Liu: dengjunliu97@163.com

21 11 Jinlin Wu: 373053785@qq.com

22 12 Yan Yue: yueyan\_1994@163.com

23 13 Jun Tang: tj1234753@sina.com

24 14 **Funding**

25 15 This study is supported by grants from the Science and Technology Bureau of Sichuan  
26 16 Province (2020YJ0298, 2020YJ0236); Health Commission of Sichuan Province (20PJ071);  
27 17 Deep Underground Space Medical Center (No.DUGM201809); and the Fundamental  
28 18 Research Funds for the Central Universities (SCU2019C4005).

29 19  
30 20 # Joint first authors: Dengjun Liu and Jinlin Wu

31 21  
32 22 **\*Correspondence**

33 23 Dr. Tao Xiong, No. 20, Section Three, South Renmin Road, Chengdu, China

34 24 Tel: 15126616986

35 25 Email: tao\_xiong@126.com

36 26  
37 27 Word count: 2054

**28 ABSTRACT****29 Introduction**

30 Thrombocytopenia is one of the most common haemostatic abnormalities among  
31 neonates. It affects approximately one-quarter of neonates admitted into neonatal  
32 intensive care units (NICUs) and may lead to high risks of bleeding and mortality,  
33 which are substantial causes for concern in neonatologists. Platelet transfusion (PT) is  
34 a specific treatment for thrombocytopenia. To date, PT thresholds are diverse, since  
35 the associations between low platelet count and negative outcomes are not clear. We  
36 propose this protocol for a systematic review to collect and assess evidence  
37 concerning the best PT threshold to reduce mortality, bleeding and major morbidity  
38 among neonates with thrombocytopenia.

**39 Methods and analysis**

40 The systematic review will be performed according to the Cochrane Handbook for  
41 Systematic Review of Interventions, the Preferred Reporting Items for Systematic  
42 Review and Meta-Analysis (PRISMA) statement, and the Grading of  
43 Recommendations Assessment, Development and Evaluation (GRADE) system. Two  
44 independent researchers will perform the study selection, data extraction/coding,  
45 quality assessment and further analyses of the included studies, with disagreements  
46 being resolved by a third researcher. A systematic search of the literature will be  
47 conducted in the PubMed, Cochrane Library, and Embase databases from database  
48 inception through October 13, 2020. All randomized controlled trials (RCTs), cohort  
49 studies and case control studies will be included without any restrictions regarding  
50 publication date or language. The primary outcome will comprise in-hospital  
51 mortality and bleeding episodes. Endnote X9 and Review Manager V.5.3 software  
52 will be used to manage the selection process and statistical analysis, respectively. If  
53 the included studies are sufficient and homogeneous for any of the outcomes, a  
54 quantitative synthesis (meta-analysis) may be performed. Otherwise, we will conduct  
55 a narrative systematic review of the results.

**56 Ethics and dissemination**

1  
2  
3  
4 57 Ethical approval is not required for this study because the data will be obtained from  
5  
6 58 published studies and will not include individual patient data. The results of this study  
7  
8 59 are anticipated to be published in a peer-reviewed journal.  
9  
10 60 **PROSPERO registration number:** CRD42020169262.  
11  
12  
13  
14  
15  
16  
17  
18  
19  
20  
21  
22  
23  
24  
25  
26  
27  
28  
29  
30  
31  
32  
33  
34  
35  
36  
37  
38  
39  
40  
41  
42  
43  
44  
45  
46  
47  
48  
49  
50  
51  
52  
53  
54  
55  
56  
57  
58  
59  
60

For peer review only

1  
2  
3  
4 61 **Strengths and limitations of this study**

- 5 62 ▶ This study will be the most recent systematic review to evaluate the PT threshold  
6  
7 63 for neonates with thrombocytopenia based on recent evidence. We will include  
8  
9 64 RCTs and observational studies and separately combine the results of each study  
10  
11 65 design.  
12  
13 66 ▶ Comprehensive and extensive analyses of the outcomes, including in-hospital  
14  
15 67 mortality, bleeding events, morbidity, the adverse effects of transfusion, and  
16  
17 68 length of stay, will be performed.  
18  
19 69 ▶ The approach of the review will be performed according to the Cochrane  
20  
21 70 Handbook and the PRISMA statement.  
22  
23 71 ▶ Formal risk of bias analyses will be performed. The quality of evidence will be  
24  
25 72 affected by the bias in original studies.  
26  
27 73 ▶ The results of this systematic review may be helpful for both clinical decisions  
28  
29 74 and further study.  
30  
31  
32  
33  
34  
35  
36  
37  
38  
39  
40  
41  
42  
43  
44  
45  
46  
47  
48  
49  
50  
51  
52  
53  
54  
55  
56  
57  
58  
59  
60



## 76 BACKGROUND

77 Thrombocytopenia, defined as a platelet count less than 150 000/ $\mu$ L, is a common  
78 haemostatic abnormality among neonates, particularly premature infants.<sup>1 2</sup> The  
79 aetiology of thrombocytopenia is complicated and involves multiple factors, including  
80 abnormal immunity, infection, and asphyxia.<sup>3-7</sup> Thrombocytopenia may be a sole  
81 clinical manifestation of alloimmune thrombocytopenia or a complication of other  
82 diseases, such as intrauterine growth restriction, polycythaemia, sepsis or necrotizing  
83 enterocolitis.<sup>3-5 8</sup> Approximately 9.4% to 35% of neonates admitted to neonatal  
84 intensive care units (NICUs) develop thrombocytopenia.<sup>5 9-12</sup> Theoretically, neonates  
85 with thrombocytopenia may develop a high risk of bleeding and mortality. This  
86 increased risk is attributed to the important role of platelets in the whole process of  
87 haemostasis, and thrombocytopenia may lead to dysfunctional haemostasis. Thus, this  
88 condition is a significant and unresolved problem for neonatologists.

89 Platelet transfusion (PT) is commonly used as a prophylactic and therapeutic  
90 treatment for bleeding episodes in neonates with thrombocytopenia. To date, the  
91 relationship between a low platelet count and major bleeding or mortality is not clear,  
92 and the efficacy of PT remains controversial, as supported by the evidence from  
93 recent trials.<sup>5 13-15</sup> Current guidelines generally recommend prophylactic PT for  
94 neonates with thrombocytopenia.<sup>16-19</sup> The recommended thresholds vary from 20  
95 000/ $\mu$ L to 30 000/ $\mu$ L<sup>15-17 20-25</sup> for non-bleeding stable neonates, while the thresholds  
96 range from 30 000/ $\mu$ L to 50 000/ $\mu$ L<sup>15 21 24-26</sup> for non-bleeding unstable neonates.  
97 These guidelines are consensus guidelines rather than evidence-based guidelines.<sup>19 27</sup>  
98 Thus, a wide range of PT thresholds has been reported among different NICUs.<sup>28 29</sup>

99 Theoretically, compared with that at a low threshold, PT at a high threshold may  
100 reduce the risks of severe thrombocytopenia, subsequent mortality and bleeding  
101 episodes. Surprisingly, a recent randomized controlled trial (RCT) reported that PT at  
102 a high threshold increased the mortality rate and bleeding events in preterm infants  
103 with severe thrombocytopenia compared with PT at a low threshold.<sup>14</sup> On the other  
104 hand, as an invasive therapy, PT results in some acknowledged adverse events,

1  
2  
3  
4 105 including transfusion-transmitted infections, bacterial sepsis, febrile nonhemolytic  
5  
6 106 transfusion reaction, transfusion-associated circulatory overload, transfusion-related  
7  
8 107 acute lung injury, and immune-mediated platelet destruction.<sup>3 30-32</sup> Furthermore, PT  
9  
10 108 has a higher risk of these adverse events than transfusions of other blood products due  
11  
12 109 to its pro-inflammatory function.

13  
14 110 Recently, more clinical trials regarding PT in neonates with thrombocytopenia  
15  
16 111 have been completed. Several reports have argued that a lower transfusion threshold  
17  
18 112 may reduce the incidence of unnecessary transfusions and financial costs without the  
19  
20 113 extra risks of bleeding and mortality.<sup>13 15</sup> We will perform this systematic review and  
21  
22 114 meta-analysis to summarize current evidence for PT in neonates and to assess the best  
23  
24 115 threshold and safety of PT.

25 116

### 27 117 **Objectives**

28  
29 118 We propose this protocol for a systematic review to collect and assess the evidence  
30  
31 119 concerning the best threshold for PT to reduce mortality, bleeding and major  
32  
33 120 morbidity among neonates with thrombocytopenia. We will further explore the best  
34  
35 121 thresholds for PT for neonates with thrombocytopenia due to various causes and more  
36  
37 122 specific clinical characteristics. Furthermore, the safety of PT will be assessed by  
38  
39 123 comparing its side effects at different thresholds.

40  
41 124

### 42 125 **METHODS AND ANALYSIS**

43  
44 126 This protocol will be conducted based on the Preferred Reporting Items for  
45  
46 127 Systematic Review and Meta-Analysis Protocol (PRISMA-P) 2015 guidelines,<sup>33</sup> and a  
47  
48 128 subsequent systematic review will be performed according to the Cochrane Handbook  
49  
50 129 for Systematic Review of Interventions,<sup>34</sup> the PRISMA statement,<sup>35</sup> and the Grading  
51  
52 130 of Recommendations Assessment, Development and Evaluation (GRADE)  
53  
54 131 approach.<sup>36</sup>

55  
56 132

### 58 133 **Data sources and search strategy**

1  
2  
3  
4 134 Comprehensive searches will be separately performed by two independent researchers  
5  
6 135 in the PubMed, Cochrane Library, and Embase databases from database inception  
7  
8 136 through October 13, 2020. No restrictions on the language will be applied to the  
9  
10 137 search. We will use the following keywords to search for and select relevant studies.

11 138 1. For neonates, the following combination of search terms will be used: “infant” or  
12  
13 139 “newborn” or “neonatal” or “neonate” or “preterm” or “premature” or “neonatology”.

14  
15 140 2. For thrombocytopenia, the following search terms will be used:  
16  
17 141 “thrombocytopenia” or “thrombocytopenic” or “NT”.

18  
19 142 3. For PT, the following search terms will be used: “platelet transfusion” or “platelet  
20  
21 143 infusion therapy” or “platelet administration” or “PT”

22  
23 144 4. Steps 1, 2 and 3 will be combined with “and”.

24  
25 145 The detailed search strategy is shown in supplemental table 1.

26  
27 146 Furthermore, we will hand-check the references of all identified trials, relevant  
28  
29 147 systematic reviews, and current treatment guidelines to avoid missing important  
30  
31 148 studies. Missing data will be handled by contacting relevant investigators for  
32  
33 149 unreported materials or additional details.

34  
35 150

## 36 37 151 **Study eligibility**

### 38 39 152 Types of studies

40  
41 153 We will include RCTs, cohort studies, and case control studies, and exclude animal  
42  
43 154 studies, in vitro studies, cross-sectional studies, case reports, case series, and  
44  
45 155 secondary or tertiary articles (systematic reviews and meta-analyses).

46  
47 156 If there are enough data to answer this review's questions using only data from  
48  
49 157 RCTs, we will report only data from RCTs.

### 50 51 158 Types of participants

52  
53 159 New-born infants with thrombocytopenia (platelet counts < 150 000/μL, the diagnosis  
54  
55 160 was established at less than 28 postnatal days and the follow-up time may extend to a  
56  
57 161 postnatal age > 28 days) admitted to NICUs will be included. We will exclude studies  
58  
59 162 of infants with congenital malformations.<sup>14</sup>

1  
2  
3  
4 163 Types of interventions and comparators

5 164 The intervention of the included study is PT for thrombocytopenia. We will compare  
6  
7 165 the effects of different transfusion platelet count thresholds. We will also record the  
8  
9 166 type and dose of the platelet component received.

10  
11 167 Types of outcomes

12  
13 168 The primary outcome will be in-hospital mortality or bleeding episodes [including  
14  
15 169 intraventricular haemorrhage (IVH), intracranial haemorrhage (ICH), pulmonary  
16  
17 170 haemorrhage (PH), frank rectal bleeding, and other bleeding].

18  
19 171 The secondary outcomes will be morbidity [including patent ductus arteriosus  
20  
21 172 (PDA), sepsis, necrotizing enterocolitis (NEC), bronchopulmonary dysplasia (BPD),  
22  
23 173 retinopathy of prematurity (ROP), etc.], adverse effects of transfusion, and the length  
24  
25 174 of stay (LOS).<sup>5 14 29 37-39</sup> The minimum length of follow-up for assessing these  
26  
27 175 outcomes will be 7 days. Detailed descriptions of the definitions of the outcomes are  
28  
29 176 provided in supplemental table 2.

30  
31 177 If the studies provided both adjusted and unadjusted results, we will only present  
32  
33 178 the adjusted results in the review.

34  
35 179

### 36 37 180 **Study selection**

38  
39 181 Two researchers will independently screen the titles and abstracts of the references  
40  
41 182 retrieved by the searches. If eligible, the full texts of potential references will be  
42  
43 183 obtained and assessed by two researchers. Studies approved by both investigators will  
44  
45 184 be included in this meta-analysis. Discrepancies in inclusion and exclusion decisions  
46  
47 185 will be solved with a third senior researcher. Endnote X9 software will be used to  
48  
49 186 tract and manage the selection process, and a PRISMA flow diagram will be  
50  
51 187 constructed to depict this process (see supplemental figure 1).

52  
53 188

### 54 55 189 **Data extraction**

56  
57 190 Structured extraction sheets (see supplemental tables 3.1-3.3) and Review Manager  
58  
59 191 V.5.3 (Cochrane Collaboration, Oxford, UK) software will be used for data extraction

1  
2  
3  
4 192 by two independent investigators, and disagreements will be resolved by a third senior  
5  
6 193 researcher. The included data items are as follows:

7  
8 194 1. Publication and study details: authors, year of publication, country, study design,  
9  
10 195 and number of participants.

11  
12 196 2. Clinical characteristics: gestational age (GA), birth weight (BW), platelet count  
13  
14 197 before transfusion or severity of thrombocytopenia, platelet count thresholds, type and  
15  
16 198 dose of platelet component, and the number of PTs.

17  
18 199 3. Outcomes: mortality, bleeding episodes, IVH grade, NEC, BPD, ROP, sepsis, and  
19  
20 200 LOS.

21  
22 201 4. Other information: any sponsorship or funding.

23  
24 202 Missing information will be handled by contacting relevant investigators for  
25  
26 203 unreported data or additional details.

27  
28 204

### 29 205 **Risk of bias in individual studies**

30  
31 206 Risk of bias will be assessed by two independent reviewers, and disagreement will be  
32  
33 207 resolved by a third reviewer.

34  
35 208 For RCTs, the 'Risk of Bias Assessment Tool' in Review Manager V.5.3  
36  
37 209 software (Cochrane Collaboration, UK) will be used. This tool includes random  
38  
39 210 sequence generation (selection bias), allocation concealment (selection bias), blinding  
40  
41 211 of participants and personnel (performance bias), blinding of outcome assessment  
42  
43 212 (detection bias), incomplete outcome data (attrition bias), selective reporting  
44  
45 213 (reporting bias), and other bias. The bias of the included studies will be divided into a  
46  
47 214 high risk of bias, low risk of bias, or unclear risk of bias in each domain (see  
48  
49 215 supplemental table 4).<sup>40</sup>

50  
51 216 The Newcastle-Ottawa scale (NOS) will be used for observational studies in  
52  
53 217 terms of selection, comparability, and outcome, with a minimum score of 0 and a  
54  
55 218 maximum score of 9. We will grade trials with scores of 9 points as high quality and  
56  
57 219 trials with scores of 1-8 points as low quality (see supplemental table 5).

58  
59 220  
60

## 221 **Data synthesis**

222 When the studies are sufficiently homogeneous for any of the described outcome  
223 measures, a quantitative synthesis (meta-analysis) may be performed according to the  
224 recommendations of the Cochrane handbook. If quantitative analysis cannot be  
225 performed, we will conduct a narrative systematic review of the results from the  
226 studies included, and we will not pool the data from the individual studies.

227 For dichotomous data (occurrence of mortality, bleeding events, morbidity,  
228 adverse events, etc.), the risk ratio (RR) will be used in the analysis of RCTs and  
229 cohort studies and the odds ratio (OR) will be used for case control studies. For  
230 continuous data (GA, BW, etc.), the mean difference (MD) or standardized mean  
231 difference (SMD) with 95% confidence intervals (CIs) will be used to represent the  
232 summary statistics of the outcome with the same units and different scales,  
233 respectively.

234

## 235 **Assessment of heterogeneity**

236 The  $\chi^2$  test ( $P \leq 0.1$  indicates substantial or considerable heterogeneity) will be used  
237 to determine whether heterogeneity is statistically significant. We will also assess the  
238 degree of statistical heterogeneity by examining  $I^2$ . The data will be pooled by  
239 applying a random-effects model following  $I^2 \geq 50\%$  or  $P \leq 0.1$ . Otherwise, the  
240 fixed-effects model will be used.

241

## 242 **Sensitivity analysis**

243 We will assess the robustness of the results by including or excluding the  
244 controversial studies, such as low-quality studies or studies with temporal ambiguity  
245 (whether the bleeding event occurred after PT is unknown).

246

## 247 **Subgroup analysis**

248 If sufficient data are identified, subgroup analyses will be performed to detect  
249 possible heterogeneity based on the following participant characteristics:

- 250 1) GA (<28 w, 28 – 32 w, 32 – 37 w, and >37 w)
- 251 2) BW (<1 000 g, 1 000 – 1 500 g, 1 500 – 2 500 g, and >2 500 g)
- 252 3) The severity of thrombocytopenia [mild (100 000 – 150 000/ $\mu$ L), moderate (50 000
- 253 – 100 000/ $\mu$ L), and severe (<50 000/ $\mu$ L)]
- 254 4) The platelet count thresholds for PT
- 255 5) The cause of thrombocytopenia and
- 256 6) The design of the study (RCTs and cohort studies)

257 We will explore the possible heterogeneity among subgroups with  $I^2$  and P  
258 values.

259

### 260 **Quality of the evidence**

261 We will use the GRADE approach<sup>36 40</sup> to assess the quality of evidence and propose to  
262 present “Summary of findings” tables (see supplemental table 6). We will construct  
263 funnel plots and perform Egger’s test to assess publication bias for each of the pooled  
264 outcomes when more than 10 included studies are available. Asymmetry may arise as  
265 a result of publication bias or of a relationship between the trial size and effect size.  
266 Egger’s linear regression analysis will be performed to test for funnel plot asymmetry.

267

### 268 **Patient and public involvement**

269 No patients are involved.

270

### 271 **DISCUSSION**

272 Due to the limited number of RCTs, observational studies are a great source of  
273 potentially high-quality data. Furthermore, observational studies have additional  
274 benefits that may justify the evidence obtained from RCTs as well. We will include  
275 RCTs and observational studies in this review because of the limited number of  
276 relevant RCTs examining neonates with thrombocytopenia. We will separately  
277 combine the results of RCTs and observational studies. To the best of our knowledge,  
278 this review will be the most recent systematic review to aim to determine the best PT

1  
2  
3  
4 279 threshold for neonates with thrombocytopenia who are admitted to NICUs. We expect  
5  
6 280 to provide the best available evidence for neonatologists and guideline developers on  
7  
8 281 PT, which will help both clinical practice and further study design.  
9

10 282

11 283 **Contributors**

12  
13 284 TX contributed to the conception of the study. The framework of the systematic  
14  
15 285 review was developed by all authors. The search strategy was designed by TX and  
16  
17 286 will be completed by YY and DJL, who will further independently screen the relevant  
18  
19 287 records, extract data from included studies and assess the risk of bias. JLW will  
20  
21 288 perform the data synthesis. TX and JT will arbitrate in cases of any disagreement and  
22  
23 289 ensure that no errors occur during the study. The manuscript describing this protocol  
24  
25 290 was drafted by DJL and revised by TX. All authors have approved the publication of  
26  
27 291 this protocol.

28  
29 292 **Competing interests**

30  
31 293 None declared.

32  
33 294 **Patient consent**

34  
35 295 Not required.

36  
37 296  
38  
39  
40  
41  
42  
43  
44  
45  
46  
47  
48  
49  
50  
51  
52  
53  
54  
55  
56  
57  
58  
59  
60



298 **REFERENCES**

- 299 1. von Lindern JS, van den Bruele T, Lopriore E, et al. Thrombocytopenia in neonates and the  
300 risk of intraventricular hemorrhage: a retrospective cohort study. *BMC Pediatr*  
301 2011;11:16.
- 302 2. Roberts I, Stanworth S and Murray NA. Thrombocytopenia in the neonate. *Blood Rev*  
303 2008;22(4):173-86.
- 304 3. Resch E, Hinkas O, Urlesberger B, et al. Neonatal thrombocytopenia-causes and outcomes  
305 following platelet transfusions. *Eur J Pediatr* 2018;177(7):1045-1052.
- 306 4. Ree IMC, Fustolo-Gunnink SF, Bekker V, et al. Thrombocytopenia in neonatal sepsis:  
307 Incidence, severity and risk factors. *PLoS One* 2017;12(10):e0185581.
- 308 5. Dahmane Ayadi I, Ben Hamida E, Youssef A, et al. Prevalence and outcomes of  
309 thrombocytopenia in a neonatal intensive care unit. *Tunis Med* 2016;94(4):305-308.
- 310 6. Winkelhorst D and Oepkes D. Foetal and neonatal alloimmune thrombocytopenia. *Best*  
311 *Pract Res Clin Obstet Gynaecol* 2019;58:15-27.
- 312 7. Kamphuis MM, Paridaans NP, Porcelijn L, et al. Incidence and consequences of neonatal  
313 alloimmune thrombocytopenia: a systematic review. *Pediatrics* 2014;133(4):715-21.
- 314 8. Guida JD, Kunig AM, Leef KH, et al. Platelet count and sepsis in very low birth weight  
315 neonates: is there an organism-specific response? *Pediatrics* 2003;111(6 Pt 1):1411-5.
- 316 9. Bolat F, Kılıç SÇ, Oflaz MB, et al. The prevalence and outcomes of thrombocytopenia in a  
317 neonatal intensive care unit: a three-year report. *Pediatric hematology and oncology*  
318 2012;29(8):710-720.
- 319 10. Castle V, Andrew M, Kelton J, et al. Frequency and mechanism of neonatal  
320 thrombocytopenia. *The Journal of pediatrics* 1986;108(5 Pt 1):749-755.
- 321 11. Mehta P, Vasa R, Neumann L, et al. Thrombocytopenia in the high-risk infant. *The*  
322 *Journal of pediatrics* 1980;97(5):791-794.
- 323 12. Ulusoy E, Tufekci O, Duman N, et al. Thrombocytopenia in neonates: causes and

- 1  
2  
3  
4 324 outcomes. *Ann Hematol* 2013;92(7):961-7.  
5  
6 325 13. Andrew M, Vegh P, Caco C, et al. A randomized, controlled trial of platelet transfusions  
7  
8 326 in thrombocytopenic premature infants. *J Pediatr* 1993;123(2):285-91.  
9  
10 327 14. Curley A, Stanworth SJ, Willoughby K, et al. Randomized Trial of Platelet-Transfusion  
11  
12 328 Thresholds in Neonates. *N Engl J Med* 2019;380(3):242-251.  
13  
14  
15 329 15. Borges JP, dos Santos AM, da Cunha DH, et al. Restrictive guideline reduces platelet  
16  
17 330 count thresholds for transfusions in very low birth weight preterm infants. *Vox Sang*  
18  
19 331 2013;104(3):207-13.  
20  
21 332 16. Girelli G, Antoncicchi S, Casadei AM, et al. Recommendations for transfusion therapy in  
22  
23 333 neonatology. *Blood Transfus* 2015;13(3):484-97.  
24  
25  
26 334 17. New HV, Berryman J, Bolton-Maggs PH, et al. Guidelines on transfusion for fetuses,  
27  
28 335 neonates and older children. *Br J Haematol* 2016;175(5):784-828.  
29  
30 336 18. Lopriore E. Updates in Red Blood Cell and Platelet Transfusions in Preterm Neonates.  
31  
32 337 *Am J Perinatol* 2019;36(S 02):S37-S40.  
33  
34  
35 338 19. Del Vecchio A, Franco C, Petrillo F, et al. Neonatal Transfusion Practice: When do  
36  
37 339 Neonates Need Red Blood Cells or Platelets? *Am J Perinatol* 2016;33(11):1079-84.  
38  
39  
40 340 20. Carr R, Kelly AM and Williamson LM. Neonatal thrombocytopenia and platelet  
41  
42 341 transfusion - a UK perspective. *Neonatology* 2015;107(1):1-7.  
43  
44 342 21. Calhoun DA, Christensen RD, Edstrom CS, et al. Consistent approaches to procedures  
45  
46 343 and practices in neonatal hematology. *Clin Perinatol* 2000;27(3):733-53.  
47  
48  
49 344 22. Sparger K, Deschmann E and Sola-Visner M. Platelet Transfusions in the Neonatal  
50  
51 345 Intensive Care Unit. *Clin Perinatol* 2015;42(3):613-23.  
52  
53 346 23. Christensen RD, Carroll PD and Josephson CD. Evidence-based advances in transfusion  
54  
55 347 practice in neonatal intensive care units. *Neonatology* 2014;106(3):245-53.  
56  
57  
58 348 24. Baer VL, Lambert DK, Schmutz N, et al. Adherence to NICU transfusion guidelines: data  
59  
60

- 1  
2  
3  
4 349 from a multihospital healthcare system. *J Perinatol* 2008;28(7):492-7.  
5  
6 350 25. Christensen RD, Paul DA, Sola-Visner MC, et al. Improving platelet transfusion practices  
7  
8 351 in the neonatal intensive care unit. *Transfusion* 2008;48(11):2281-4.  
9  
10 352 26. Gibson BE, Todd A, Roberts I, et al. Transfusion guidelines for neonates and older  
11  
12 353 children. *Br J Haematol* 2004;124(4):433-53.  
13  
14 354 27. Cremer M, Sallmon H, Kling PJ, et al. Thrombocytopenia and platelet transfusion in the  
15  
16 355 neonate. *Semin Fetal Neonatal Med* 2016;21(1):10-8.  
17  
18 356 28. Fustolo-Gunnink SF, Huisman EJ, van der Bom JG, et al. Are thrombocytopenia and  
19  
20 357 platelet transfusions associated with major bleeding in preterm neonates? A systematic  
21  
22 358 review. *Blood Rev* 2019;36:1-9.  
23  
24 359 29. Kumar J, Dutta S, Sundaram V, et al. Platelet Transfusion for PDA Closure in Preterm  
25  
26 360 Infants: A Randomized Controlled Trial. *Pediatrics* 2019;143(5)  
27  
28 361 30. Haass KA, Sapiano MRP, Savinkina A, et al. Transfusion-Transmitted Infections  
29  
30 362 Reported to the National Healthcare Safety Network Hemovigilance Module. *Transfus*  
31  
32 363 *Med Rev* 2019;33(2):84-91.  
33  
34 364 31. Stolla M, Refaai MA, Heal JM, et al. Platelet transfusion - the new immunology of an old  
35  
36 365 therapy. *Front Immunol* 2015;6:28.  
37  
38 366 32. Stainsby D, Jones H, Asher D, et al. Serious hazards of transfusion: a decade of  
39  
40 367 hemovigilance in the UK. *Transfus Med Rev* 2006;20(4):273-82.  
41  
42 368 33. Shamseer L, Moher D, Clarke M, et al. Preferred reporting items for systematic review  
43  
44 369 and meta-analysis protocols (PRISMA-P) 2015: elaboration and explanation. *BMJ*  
45  
46 370 2015;350:g7647.  
47  
48 371 34. Higgins JPT, Thomas J, Chandler J, et al. Cochrane Handbook for Systematic Reviews of  
49  
50 372 Interventions . [Type]: Chichester (UK): John Wiley & Sons, 2019.  
51  
52 373 35. Moher D, Liberati A, Tetzlaff J, et al. Preferred reporting items for systematic reviews  
53  
54 374 and meta-analyses: the PRISMA statement. *Int J Surg* 2010;8(5):336-41.  
55  
56  
57  
58  
59  
60

- 1  
2  
3  
4 375 36. Guyatt G, Oxman AD, Akl EA, et al. GRADE guidelines: 1. Introduction-GRADE  
5  
6 376 evidence profiles and summary of findings tables. *J Clin Epidemiol* 2011;64(4):383-94.  
7  
8 377 37. Roberts JC, Javed MJ, Hocker JR, et al. Risk factors associated with intraventricular  
9  
10 378 hemorrhage in extremely premature neonates. *Blood Coagul Fibrinolysis*  
11  
12 379 2018;29(1):25-29.  
13  
14 380 38. Sancak S, Toptan HH, Gokmen Yildirim T, et al. THROMBOCYTOPENIA AS A RISK  
15  
16 381 FACTOR FOR RETINOPATHY OF PREMATURITY. *Retina* 2019;39(4):706-711.  
17  
18 382 39. Jensen AK, Ying GS, Huang J, et al. Longitudinal study of the association between  
19  
20 383 thrombocytopenia and retinopathy of prematurity. *J aapos* 2018;22(2):119-123.  
21  
22 384 40. Higgins JPT, Altman DG, Gøtzsche PC, et al. The Cochrane Collaboration's tool for  
23  
24 385 assessing risk of bias in randomised trials. 2011;343:d5928.  
25  
26  
27  
28  
29  
30  
31  
32  
33  
34  
35  
36  
37  
38  
39  
40  
41  
42  
43  
44  
45  
46  
47  
48  
49  
50  
51  
52  
53  
54  
55  
56  
57  
58  
59  
60

**Supplemental Figure 1. Flow Diagram of Studies Selected for Inclusion in the Systematic Review (PRISMA 2009 Flow Diagram)**

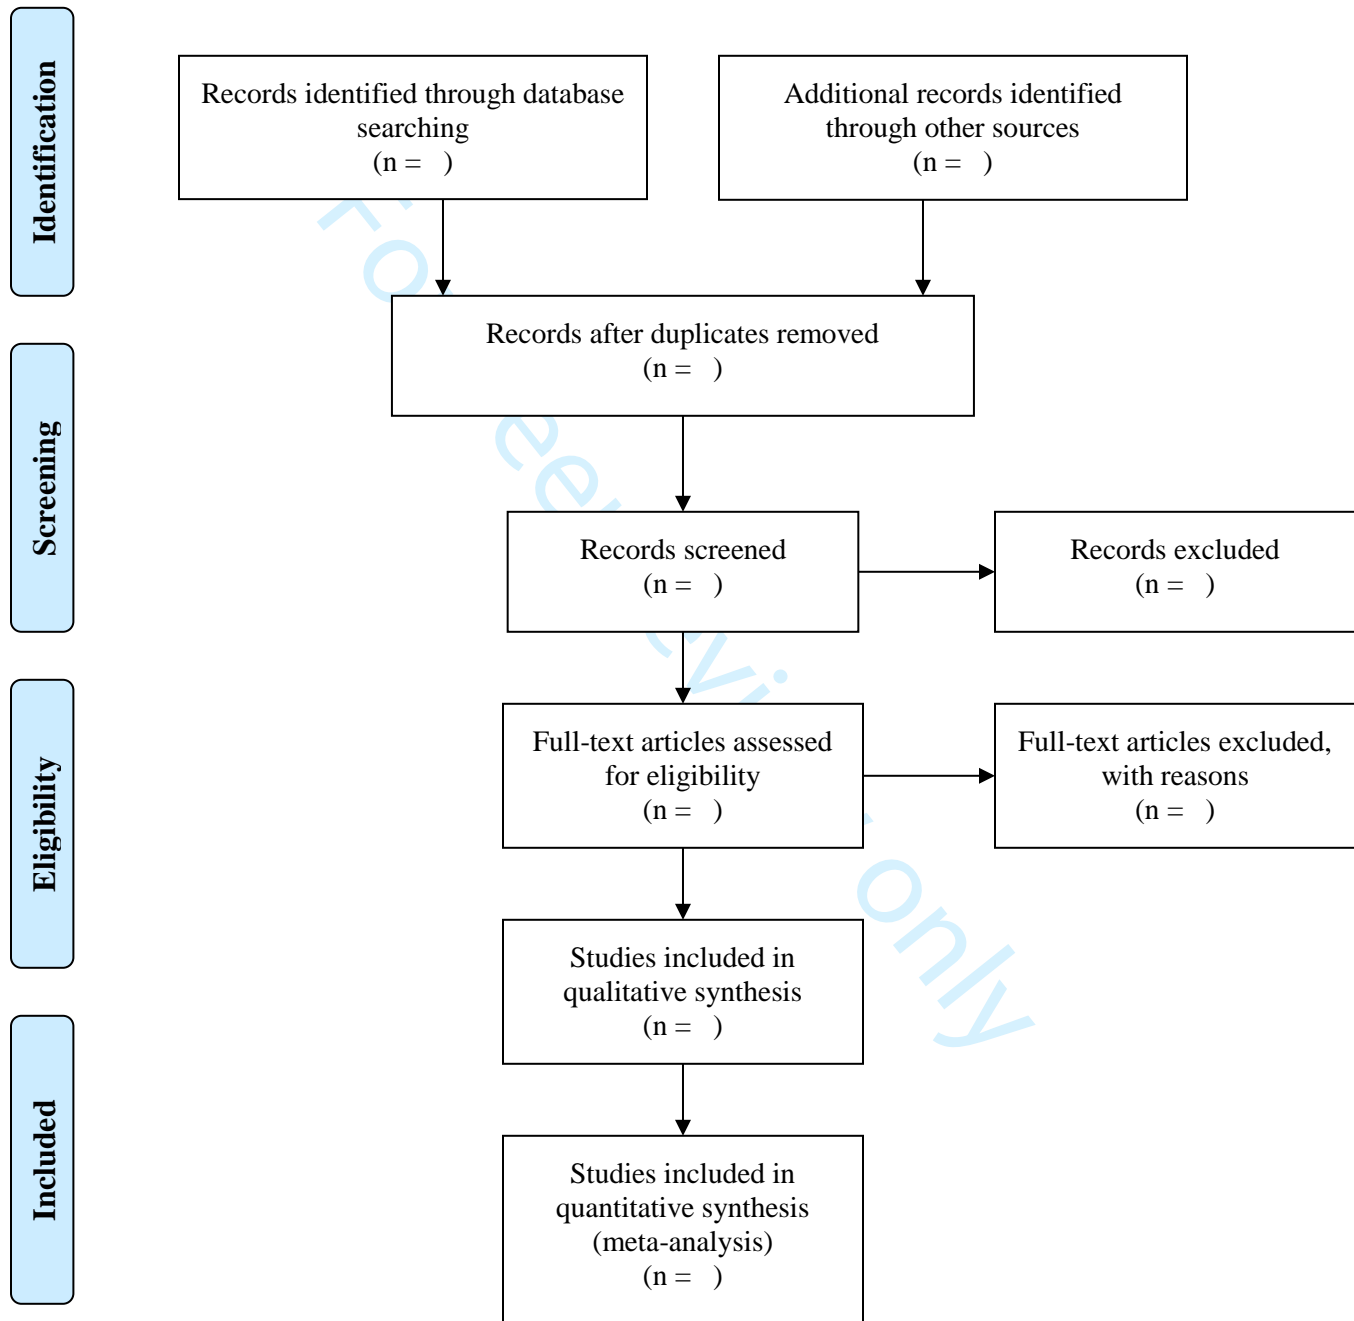

**Supplemental Table 1. Search strategy used for the following databases:  
PubMed, The Cochrane Central Register of Controlled Trials and Embase.**

**Table 1.1 PubMed**

| Query |                               |
|-------|-------------------------------|
| #1    | “Platelet Transfusion” [MeSH] |
| #2    | platelet transfusion          |
| #3    | platelet transfus*            |
| #4    | platelet infusion therapy     |
| #5    | platelet infus*               |
| #6    | platelet administration       |
| #7    | platelet administrat*         |
| #8    | PT                            |
| #9    | thrombocyte transfusion       |
| #10   | thrombocyte transfus*         |
| #11   | thrombocyte infusion therapy  |
| #12   | thrombocyte infus*            |
| #13   | thrombocyte administration    |
| #14   | thrombocyte administrat*      |
| #15   | “Thrombocytopenia” [MeSH]     |
| #16   | thrombocytopenia              |
| #17   | thrombocytopenic              |
| #18   | thrombocytopen*               |
| #19   | NT                            |
| #20   | “Infant, Newborn” [MeSH]      |

|     |                                                                                  |
|-----|----------------------------------------------------------------------------------|
| #21 | infant                                                                           |
| #22 | newborn                                                                          |
| #23 | neonatal                                                                         |
| #24 | neonate                                                                          |
| #25 | neonatology                                                                      |
| #26 | neonat*                                                                          |
| #27 | preterm                                                                          |
| #28 | premature                                                                        |
| #29 | prematu*                                                                         |
| #30 | #1 or #3 or #4 or #5 or #6 or #7 or #8 or #9 or #10 or #11 or #12 or #13 or #14  |
| #31 | #15 or #16 or #17 or #18 or #19                                                  |
| #32 | #20 or #21 or #22 or #22 or #23 or #24 or #25 or #26 or #26 or #27 or #28 or #29 |
| #33 | #30 and #31 and #32 Filters: Humans                                              |

**Table 1.2 The Cochrane Central Register of Controlled Trials**

| Query |                                                                            |
|-------|----------------------------------------------------------------------------|
| #1    | MeSH descriptor: [Platelet Transfusion] explode all trees                  |
| #2    | (platelet transfusion): ti, ab, kw (word variations have been searched)    |
| #3    | (platelet transfus*): ti, ab, kw (word variations have been searched)      |
| #4    | (platelet infusion): ti, ab, kw (word variations have been searched)       |
| #5    | (platelet infus*): ti, ab, kw (word variations have been searched)         |
| #6    | (platelet administration): ti, ab, kw (word variations have been searched) |
| #7    | (platelet administrat*): ti, ab, kw (word variations have been searched)   |
| #8    | (PT): ti, ab, kw (word variations have been searched)                      |
| #9    | (thrombocyte transfusion): ti, ab, kw                                      |
| #10   | (thrombocyte transfus*): ti, ab, kw                                        |
| #11   | (thrombocyte infusion therapy): ti, ab, kw                                 |
| #12   | (thrombocyte infus*): ti, ab, kw                                           |
| #13   | (thrombocyte administration): ti, ab, kw                                   |
| #14   | (thrombocyte administrat*): ti, ab, kw                                     |
| #15   | MeSH descriptor: [Thrombocytopenia] explode all trees                      |
| #16   | (thrombocytopenia): ti, ab, kw (word variations have been searched)        |
| #17   | (thrombocytopenic): ti, ab, kw (word variations have been searched)        |
| #18   | (thrombocytopeni*): ti, ab, kw (word variations have been searched)        |
| #19   | (NT): ti, ab, kw (word variations have been searched)                      |
| #20   | MeSH descriptor: [Infant, Newborn] explode all trees                       |
| #21   | (infant): ti, ab, kw                                                       |
| #22   | (newborn): ti, ab, kw                                                      |



|     |                                                                                  |
|-----|----------------------------------------------------------------------------------|
| #23 | (neonatal): ti, ab, kw                                                           |
| #24 | (neonate): ti, ab, kw                                                            |
| #25 | (neonatology): ti, ab, kw                                                        |
| #26 | (neonat*): ti, ab, kw                                                            |
| #27 | (preterm): ti, ab, kw                                                            |
| #28 | (premature): ti, ab, kw                                                          |
| #29 | (prematu*): ti, ab, kw                                                           |
| #30 | #1 or #3 or #4 or #5 or #6 or #7 or #8 or #9 or #10 or #11 or #12 or #13 or #14  |
| #31 | #15 or #16 or #17 or #18 or #19                                                  |
| #32 | #20 or #21 or #22 or #22 or #23 or #24 or #25 or #26 or #26 or #27 or #28 or #29 |
| #33 | #30 and #31 and #32 in Trials                                                    |

**Table 1.3 Embase**

| Query |                                                      |
|-------|------------------------------------------------------|
| #1    | 'thrombocyte transfusion'/exp                        |
| #2    | 'thrombocyte transfusion'                            |
| #3    | thrombocyte transfus*                                |
| #4    | 'thrombocyte infusion therapy'                       |
| #5    | thrombocyte infus*                                   |
| #6    | 'thrombocyte administration'                         |
| #7    | thrombocyte administrat*                             |
| #8    | 'platelet transfusion'/exp OR 'platelet transfusion' |
| #9    | platelet transfus*                                   |
| #10   | 'platelet infusion therapy'                          |
| #11   | platelet infus*                                      |
| #12   | 'platelet administration'                            |
| #13   | platelet administrat*                                |
| #14   | pt                                                   |
| #15   | 'thrombocytopenia'/exp                               |
| #16   | 'thrombocytopenia'                                   |
| #17   | thrombocytopenic                                     |
| #18   | thrombocytopen*                                      |
| #19   | nt                                                   |
| #20   | 'newborn'/exp                                        |
| #21   | infant                                               |
| #22   | newborn                                              |

|     |                                                                                                                                                                                                                                                                                                                                                                                                                                                                                                                                                                                                  |
|-----|--------------------------------------------------------------------------------------------------------------------------------------------------------------------------------------------------------------------------------------------------------------------------------------------------------------------------------------------------------------------------------------------------------------------------------------------------------------------------------------------------------------------------------------------------------------------------------------------------|
| #23 | neonatal                                                                                                                                                                                                                                                                                                                                                                                                                                                                                                                                                                                         |
| #24 | neonate                                                                                                                                                                                                                                                                                                                                                                                                                                                                                                                                                                                          |
| #25 | neonatology                                                                                                                                                                                                                                                                                                                                                                                                                                                                                                                                                                                      |
| #26 | neonat*                                                                                                                                                                                                                                                                                                                                                                                                                                                                                                                                                                                          |
| #27 | preterm                                                                                                                                                                                                                                                                                                                                                                                                                                                                                                                                                                                          |
| #28 | premature                                                                                                                                                                                                                                                                                                                                                                                                                                                                                                                                                                                        |
| #29 | prematu*                                                                                                                                                                                                                                                                                                                                                                                                                                                                                                                                                                                         |
| #30 | #1 or #3 or #4 or #5 or #6 or #7 or #8 or #9 or #10 or #11 or #12 or #13 or #14                                                                                                                                                                                                                                                                                                                                                                                                                                                                                                                  |
| #31 | #15 or #16 or #17 or #18 or #19                                                                                                                                                                                                                                                                                                                                                                                                                                                                                                                                                                  |
| #32 | #20 or #21 or #22 or #22 or #23 or #24 or #25 or #26 or #26 or #27 or #28 or #29                                                                                                                                                                                                                                                                                                                                                                                                                                                                                                                 |
| #33 | #32 AND ('clinical article'/de OR 'clinical study'/de OR 'clinical trial'/de OR 'clinical trial topic'/de OR 'cohort analysis'/de OR 'controlled clinical trial'/de OR 'controlled study'/de OR 'feasibility study'/de OR 'human'/de OR 'human experiment'/de OR 'intermethod comparison'/de OR 'major clinical study'/de OR 'multicenter study'/de OR 'observational study'/de OR 'open study'/de OR 'outcomes research'/de OR 'phase 2 clinical trial'/de OR 'prospective study'/de OR 'randomized controlled trial'/de OR 'randomized controlled trial topic'/de OR 'retrospective study'/de) |

**Supplemental Table 2. Definitions of outcome measures**

| Outcome measures      | Definitions                                                                                                                                                                                                                                                                                                                                                                                                                                                                                                                                                                                                                |
|-----------------------|----------------------------------------------------------------------------------------------------------------------------------------------------------------------------------------------------------------------------------------------------------------------------------------------------------------------------------------------------------------------------------------------------------------------------------------------------------------------------------------------------------------------------------------------------------------------------------------------------------------------------|
| IVH                   | <p>The presence of blood inside the ventricles on CT or cranial ultrasonography.</p> <p>Grading of IVH (as described by J. Volpe):</p> <ul style="list-style-type: none"> <li>-Grade I: Bleeding confined to the periventricular area (germinal matrix)</li> <li>-Grade II: Intraventricular bleeding (10-50% of the ventricular area on a sagittal view)</li> <li>-Grade III: Intraventricular bleeding (&gt;50% of the ventricular area or distends the ventricle)</li> <li>-Intra-parenchymal echodensity (IPE) represents periventricular haemorrhagic infarction and is often referred to as Grade IV IVH.</li> </ul> |
| ICH                   | The presence of blood within the skull on CT or cranial ultrasonography.                                                                                                                                                                                                                                                                                                                                                                                                                                                                                                                                                   |
| PH                    | The presence of frank tracheal blood and multi-lobular opacity on chest X-rays.                                                                                                                                                                                                                                                                                                                                                                                                                                                                                                                                            |
| Frank rectal bleeding | Macroscopic faecal bleed.                                                                                                                                                                                                                                                                                                                                                                                                                                                                                                                                                                                                  |
| PDA                   | The ductus arteriosus remains open on the echocardiography or associated Doppler studies.                                                                                                                                                                                                                                                                                                                                                                                                                                                                                                                                  |
| BPD                   | Treated with more than 21% oxygen for at least 28 days.                                                                                                                                                                                                                                                                                                                                                                                                                                                                                                                                                                    |
| Sepsis                | A bacterial bloodstream infection (blood culture-proven infection).                                                                                                                                                                                                                                                                                                                                                                                                                                                                                                                                                        |
| NEC                   | At least one clinical finding (bilious gastric aspirate or emesis, abdominal distension, or occult or gross blood in the stool in the absence of anal fissures) and at least one radiographic finding (pneumatosis intestinalis, hepatobiliary gas, or pneumoperitoneum).                                                                                                                                                                                                                                                                                                                                                  |
| ROP                   | Diagnosed by the ophthalmologist according to the International Classification of Retinopathy of Prematurity, first published in 1985 and revised in 2005.                                                                                                                                                                                                                                                                                                                                                                                                                                                                 |

IVH: intraventricular haemorrhage; CT: computed tomography; ICH: intracranial haemorrhage; PH: pulmonary haemorrhage; PDA: patent ductus arteriosus; BPD: bronchopulmonary dysplasia; NEC: necrotizing enterocolitis; ROP: retinopathy of prematurity.

Supplemental Table 3.1 Data extraction sheet for RCTs

| Publication and study details                                       |                                                                                         |                             |                       |                                                                                    |                           |                  |
|---------------------------------------------------------------------|-----------------------------------------------------------------------------------------|-----------------------------|-----------------------|------------------------------------------------------------------------------------|---------------------------|------------------|
| Authors                                                             |                                                                                         |                             |                       |                                                                                    |                           |                  |
| Year of publication                                                 |                                                                                         |                             |                       |                                                                                    |                           |                  |
| Country                                                             |                                                                                         |                             |                       |                                                                                    |                           |                  |
| Study design                                                        |                                                                                         |                             |                       |                                                                                    |                           |                  |
| Number of participants                                              |                                                                                         |                             |                       |                                                                                    |                           |                  |
| Groups                                                              | Experimental<br>platelet count threshold<br>(*10 <sup>-3</sup> per<br>cubic millimeter) |                             |                       | Control<br>platelet count threshold<br>(*10 <sup>-3</sup> per<br>cubic millimeter) |                           |                  |
| Clinical characteristics                                            |                                                                                         |                             |                       |                                                                                    |                           |                  |
|                                                                     | Experimental<br>median (or<br>mean)                                                     | Experimental<br>IQR (or SD) | Experimental<br>total | Control<br>median (or<br>mean)                                                     | Control<br>IQR (or<br>SD) | Control<br>total |
| GA (w)                                                              |                                                                                         |                             |                       |                                                                                    |                           |                  |
| BW (g)                                                              |                                                                                         |                             |                       |                                                                                    |                           |                  |
| Platelet<br>count (*10 <sup>-3</sup><br>per<br>cubic<br>millimeter) |                                                                                         |                             |                       |                                                                                    |                           |                  |
| Number of<br>platelet<br>transfusions                               |                                                                                         |                             |                       |                                                                                    |                           |                  |
| Primary outcomes                                                    |                                                                                         |                             |                       |                                                                                    |                           |                  |
|                                                                     | Experimental<br>event                                                                   | Experimental<br>total       | Control<br>event      | Control<br>total                                                                   |                           |                  |
| In-hospital mortality<br>or major bleeding<br>events                |                                                                                         |                             |                       |                                                                                    |                           |                  |
| Bleeding episodes                                                   |                                                                                         |                             |                       |                                                                                    |                           |                  |
| IVH                                                                 |                                                                                         |                             |                       |                                                                                    |                           |                  |
| ICH                                                                 |                                                                                         |                             |                       |                                                                                    |                           |                  |
| PH                                                                  |                                                                                         |                             |                       |                                                                                    |                           |                  |
| Frank rectal bleeding                                               |                                                                                         |                             |                       |                                                                                    |                           |                  |
| Other bleeding                                                      |                                                                                         |                             |                       |                                                                                    |                           |                  |
| Secondary outcomes                                                  |                                                                                         |                             |                       |                                                                                    |                           |                  |
| Major morbidity                                                     |                                                                                         |                             |                       |                                                                                    |                           |                  |

|                                     |                               |                          |                    |                          |                     |               |
|-------------------------------------|-------------------------------|--------------------------|--------------------|--------------------------|---------------------|---------------|
|                                     | Experimental event            | Experimental total       | Control event      |                          | Control total       |               |
| PDA                                 |                               |                          |                    |                          |                     |               |
| BPD                                 |                               |                          |                    |                          |                     |               |
| Sepsis                              |                               |                          |                    |                          |                     |               |
| NEC                                 |                               |                          |                    |                          |                     |               |
| ROP                                 |                               |                          |                    |                          |                     |               |
| <b>Other outcome measures</b>       |                               |                          |                    |                          |                     |               |
| LOS (days)                          | Experimental median (or mean) | Experimental IQR (or SD) | Experimental total | Control median (or mean) | Control IQR (or SD) | Control total |
|                                     |                               |                          |                    |                          |                     |               |
| Adverse effects of transfusion      | Experimental event            | Experimental total       | Control event      |                          | Control total       |               |
|                                     |                               |                          |                    |                          |                     |               |
| <b>Other information</b>            |                               |                          |                    |                          |                     |               |
| Type and dose of platelet component |                               |                          |                    |                          |                     |               |
| Any sponsorship or funding          |                               |                          |                    |                          |                     |               |

IQR: interquartile range; SD: standard deviation; GA: gestational age; BW: birth weight; IVH: intraventricular haemorrhage; ICH: intracranial haemorrhage; PH: pulmonary haemorrhage; BPD: bronchopulmonary dysplasia; NEC: necrotizing enterocolitis; PDA: patent ductus arteriosus; NEC: necrotizing enterocolitis; ROP: retinopathy of prematurity; LOS: length of stay

**Supplemental Table 3.2 Data extraction sheet for cohort studies**

| Publication and study details                           |                                                                           |                     |               |                                                                           |                     |               |                                                                           |                     |               |
|---------------------------------------------------------|---------------------------------------------------------------------------|---------------------|---------------|---------------------------------------------------------------------------|---------------------|---------------|---------------------------------------------------------------------------|---------------------|---------------|
| Authors                                                 |                                                                           |                     |               |                                                                           |                     |               |                                                                           |                     |               |
| Year of publication                                     |                                                                           |                     |               |                                                                           |                     |               |                                                                           |                     |               |
| Country                                                 |                                                                           |                     |               |                                                                           |                     |               |                                                                           |                     |               |
| Study design                                            |                                                                           |                     |               |                                                                           |                     |               |                                                                           |                     |               |
| Number of participants                                  |                                                                           |                     |               |                                                                           |                     |               |                                                                           |                     |               |
| Groups                                                  | Group 1 platelet count threshold (*10 <sup>-3</sup> per cubic millimetre) |                     |               | Group 2 platelet count threshold (*10 <sup>-3</sup> per cubic millimetre) |                     |               | Group N platelet count threshold (*10 <sup>-3</sup> per cubic millimetre) |                     |               |
|                                                         |                                                                           |                     |               |                                                                           |                     |               |                                                                           |                     |               |
| Clinical characteristics                                |                                                                           |                     |               |                                                                           |                     |               |                                                                           |                     |               |
|                                                         | Group 1 median (or mean)                                                  | Group 1 IQR (or SD) | Group 1 total | Group 2 median (or mean)                                                  | Group 2 IQR (or SD) | Group 2 total | Group N median (or mean)                                                  | Group N IQR (or SD) | Group N total |
| GA (w)                                                  |                                                                           |                     |               |                                                                           |                     |               |                                                                           |                     |               |
| BW (g)                                                  |                                                                           |                     |               |                                                                           |                     |               |                                                                           |                     |               |
| Platelet count (*10 <sup>-3</sup> per cubic millimetre) |                                                                           |                     |               |                                                                           |                     |               |                                                                           |                     |               |
| Number of platelet transfusions                         |                                                                           |                     |               |                                                                           |                     |               |                                                                           |                     |               |
| Primary outcomes                                        |                                                                           |                     |               |                                                                           |                     |               |                                                                           |                     |               |
|                                                         | Group 1 event                                                             | Group 1 total       | Group 2 event | Group 2 total                                                             | Group N event       | Group N total |                                                                           |                     |               |
| In-hospital mortality or major bleeding events          |                                                                           |                     |               |                                                                           |                     |               |                                                                           |                     |               |
| Bleeding episodes                                       |                                                                           |                     |               |                                                                           |                     |               |                                                                           |                     |               |
| IVH                                                     |                                                                           |                     |               |                                                                           |                     |               |                                                                           |                     |               |
| ICH                                                     |                                                                           |                     |               |                                                                           |                     |               |                                                                           |                     |               |
| PH                                                      |                                                                           |                     |               |                                                                           |                     |               |                                                                           |                     |               |
| Frank rectal bleeding                                   |                                                                           |                     |               |                                                                           |                     |               |                                                                           |                     |               |
| Other bleeding                                          |                                                                           |                     |               |                                                                           |                     |               |                                                                           |                     |               |

| Secondary outcomes                  |                          |                     |               |                          |                     |               |                          |                     |               |
|-------------------------------------|--------------------------|---------------------|---------------|--------------------------|---------------------|---------------|--------------------------|---------------------|---------------|
| Major morbidity                     |                          |                     |               |                          |                     |               |                          |                     |               |
|                                     | Group 1 event            | Group 1 total       | Group 2 event | Group 2 total            | Group N event       | Group N total |                          |                     |               |
| PDA                                 |                          |                     |               |                          |                     |               |                          |                     |               |
| BPD                                 |                          |                     |               |                          |                     |               |                          |                     |               |
| Sepsis                              |                          |                     |               |                          |                     |               |                          |                     |               |
| NEC                                 |                          |                     |               |                          |                     |               |                          |                     |               |
| ROP                                 |                          |                     |               |                          |                     |               |                          |                     |               |
| Other outcome measures              |                          |                     |               |                          |                     |               |                          |                     |               |
| LOS (days)                          | Group 1 median (or mean) | Group 1 IQR (or SD) | Group 1 total | Group 2 median (or mean) | Group 2 IQR (or SD) | Group 2 total | Group N median (or mean) | Group N IQR (or SD) | Group N total |
|                                     |                          |                     |               |                          |                     |               |                          |                     |               |
| Adverse effects of transfusion      | Group 1 event            | Group 1 total       | Group 2 event | Group 2 total            | Group N event       | Group N total |                          |                     |               |
|                                     |                          |                     |               |                          |                     |               |                          |                     |               |
| Other information                   |                          |                     |               |                          |                     |               |                          |                     |               |
| Type and dose of platelet component |                          |                     |               |                          |                     |               |                          |                     |               |
| Any sponsorship or funding          |                          |                     |               |                          |                     |               |                          |                     |               |

IQR: interquartile range; SD: standard deviation; GA: gestational age; BW: birth weight; IVH: intraventricular haemorrhage; ICH: intracranial haemorrhage; PH: pulmonary haemorrhage; BPD: bronchopulmonary dysplasia; NEC: necrotizing enterocolitis; PDA: patent ductus arteriosus; NEC: necrotizing enterocolitis; ROP: retinopathy of prematurity; LOS: length of stay



**Supplemental Table 3.3 Data extraction sheet for case control studies**

| Publication and study details                           |                                                                                 |                           |                       |                                                                                   |                             |                       |
|---------------------------------------------------------|---------------------------------------------------------------------------------|---------------------------|-----------------------|-----------------------------------------------------------------------------------|-----------------------------|-----------------------|
| Authors                                                 |                                                                                 |                           |                       |                                                                                   |                             |                       |
| Year of publication                                     |                                                                                 |                           |                       |                                                                                   |                             |                       |
| Country                                                 |                                                                                 |                           |                       |                                                                                   |                             |                       |
| Study design                                            |                                                                                 |                           |                       |                                                                                   |                             |                       |
| Number of participants                                  |                                                                                 |                           |                       |                                                                                   |                             |                       |
| Groups                                                  | Exposed group platelet count threshold (*10 <sup>-3</sup> per cubic millimetre) |                           |                       | Unexposed group platelet count threshold (*10 <sup>-3</sup> per cubic millimetre) |                             |                       |
|                                                         |                                                                                 |                           |                       |                                                                                   |                             |                       |
| Clinical characteristics                                |                                                                                 |                           |                       |                                                                                   |                             |                       |
|                                                         | Exposed group median (or mean)                                                  | Exposed group IQR (or SD) | Exposed group total   | Unexposed group median (or mean)                                                  | Unexposed group IQR (or SD) | Unexposed group total |
| GA (w)                                                  |                                                                                 |                           |                       |                                                                                   |                             |                       |
| BW (g)                                                  |                                                                                 |                           |                       |                                                                                   |                             |                       |
| Platelet count (*10 <sup>-3</sup> per cubic millimetre) |                                                                                 |                           |                       |                                                                                   |                             |                       |
| Number of platelet transfusions                         |                                                                                 |                           |                       |                                                                                   |                             |                       |
| Primary outcomes                                        |                                                                                 |                           |                       |                                                                                   |                             |                       |
|                                                         | Exposed group event                                                             | Exposed group total       | Unexposed group event | Unexposed group total                                                             |                             |                       |
| In-hospital mortality or major bleeding events          |                                                                                 |                           |                       |                                                                                   |                             |                       |
| Bleeding episodes                                       |                                                                                 |                           |                       |                                                                                   |                             |                       |
| IVH                                                     |                                                                                 |                           |                       |                                                                                   |                             |                       |
| ICH                                                     |                                                                                 |                           |                       |                                                                                   |                             |                       |

|                                     |                                |                           |                       |                                  |                             |                       |
|-------------------------------------|--------------------------------|---------------------------|-----------------------|----------------------------------|-----------------------------|-----------------------|
| PH                                  |                                |                           |                       |                                  |                             |                       |
| Frank rectal bleeding               |                                |                           |                       |                                  |                             |                       |
| Other bleeding                      |                                |                           |                       |                                  |                             |                       |
| <b>Secondary outcomes</b>           |                                |                           |                       |                                  |                             |                       |
| Major morbidity                     |                                |                           |                       |                                  |                             |                       |
|                                     | Exposed group event            | Exposed group total       | Unexposed group event | Unexposed group total            |                             |                       |
| PDA                                 |                                |                           |                       |                                  |                             |                       |
| BPD                                 |                                |                           |                       |                                  |                             |                       |
| Sepsis                              |                                |                           |                       |                                  |                             |                       |
| NEC                                 |                                |                           |                       |                                  |                             |                       |
| ROP                                 |                                |                           |                       |                                  |                             |                       |
| <b>Other outcome measures</b>       |                                |                           |                       |                                  |                             |                       |
| LOS (days)                          | Exposed group median (or mean) | Exposed group IQR (or SD) | Exposed group total   | Unexposed group median (or mean) | Unexposed group IQR (or SD) | Unexposed group total |
|                                     |                                |                           |                       |                                  |                             |                       |
| Adverse effects of transfusion      | Exposed group event            | Exposed group total       | Unexposed group event | Unexposed group total            |                             |                       |
|                                     |                                |                           |                       |                                  |                             |                       |
| <b>Other information</b>            |                                |                           |                       |                                  |                             |                       |
| Type and dose of platelet component |                                |                           |                       |                                  |                             |                       |
| Any sponsorship or funding          |                                |                           |                       |                                  |                             |                       |

IQR: interquartile range; SD: standard deviation; GA: gestational age; BW: birth weight; IVH: intraventricular haemorrhage; ICH: intracranial haemorrhage; PH: pulmonary haemorrhage; BPD: bronchopulmonary dysplasia; NEC: necrotizing enterocolitis; PDA: patent ductus arteriosus; NEC: necrotizing enterocolitis; ROP: retinopathy of prematurity; LOS: length of stay

**Supplemental Table 4. The risk of bias assessment tool for randomized controlled studies**

**Supplemental Table 4.1 The risk of bias table**

| <b>Item</b>                                                      | <b>Judgement</b> | <b>Support for judgement</b> |
|------------------------------------------------------------------|------------------|------------------------------|
| <b>Random sequence generation (selection bias)</b>               |                  |                              |
| <b>Allocation concealment (selection bias)</b>                   |                  |                              |
| <b>Blinding of participants and personnel (performance bias)</b> |                  |                              |
| <b>Blinding of outcome assessment (detection bias)</b>           |                  |                              |
| <b>Incomplete outcome data addressed (attrition bias)</b>        |                  |                              |
| <b>Selective reporting (reporting bias)</b>                      |                  |                              |
| <b>Other bias</b>                                                |                  |                              |

**Supplemental Table 4.2 The recommended list of items in the risk of bias tool**

| <b>Bias domain</b> | <b>Source of bias</b>                   | <b>Support for judgment</b>                                                                                                                                                         | <b>Review authors' judgment (assess as low, unclear or high risk of bias)</b>                                      |
|--------------------|-----------------------------------------|-------------------------------------------------------------------------------------------------------------------------------------------------------------------------------------|--------------------------------------------------------------------------------------------------------------------|
| Selection bias     | Random sequence generation              | Describes the method used to generate the allocation sequence in sufficient detail to allow an assessment of whether it should produce comparable groups                            | Selection bias (biased allocation to interventions) due to the inadequate generation of a randomised sequence      |
|                    | Allocation concealment                  | Describes the method used to conceal the allocation sequence in sufficient detail to determine whether intervention allocations could have been foreseen before or during enrolment | Selection bias (biased allocation to interventions) due to inadequate concealment of allocations before assignment |
| Performance bias   | Blinding of participants and personnel* | Describes all measures used, if any, to blind trial participants and researchers from knowledge of which intervention a participant received. Provides any information related to   | Performance bias due to knowledge of the allocated interventions by participants and personnel during the study    |

|                |                                 |                                                                                                                                                                                                                                                                     |                                                                                      |
|----------------|---------------------------------|---------------------------------------------------------------------------------------------------------------------------------------------------------------------------------------------------------------------------------------------------------------------|--------------------------------------------------------------------------------------|
|                |                                 | whether the intended blinding was effective.                                                                                                                                                                                                                        |                                                                                      |
| Detection bias | Blinding of outcome assessment* | Describes all measures used, if any, to blind outcome assessments from knowledge of which intervention a participant received. Provides any information related to whether the intended blinding was effective.                                                     | Detection bias due to knowledge of the allocated interventions by outcome assessment |
| Attrition bias | Incomplete outcome data*        | Describes the completeness of outcome data for each main outcome, including attrition and exclusions from the analysis. States whether attrition and exclusions were reported, the numbers in each intervention group (compared with the total number of randomised | Attrition bias due to the amount, nature, or handling of incomplete outcome data     |

|                |                                     |                                                                                                                     |                                                   |
|----------------|-------------------------------------|---------------------------------------------------------------------------------------------------------------------|---------------------------------------------------|
|                |                                     | participants), reasons for attrition or exclusions where reported, and any reinclusions in analyses for the review. |                                                   |
| Reporting bias | Selective reporting                 | States how selective outcome reporting was examined and what was found.                                             | Reporting bias due to selective outcome reporting |
| Other bias     | Anything else, ideally prespecified | States any important concerns about bias not covered in the other domains of the tool.                              | Bias due to problems not covered elsewhere        |

\*Assessments of each main outcome or class of outcomes should be performed.

**Supplemental Table 4.3 Approach to formulating summary assessments of the risk of bias for each important outcome (across domains) within and across trials**

| <b>Risk of bias</b>  | <b>Interpretation</b>                                        | <b>Within a trial</b>                             | <b>Across trials</b>                                                                                                 |
|----------------------|--------------------------------------------------------------|---------------------------------------------------|----------------------------------------------------------------------------------------------------------------------|
| Low risk of bias     | Bias, if present, is unlikely to alter the results seriously | A low risk of bias for all key domains            | Most information is obtained from trials at low risk of bias                                                         |
| Unclear risk of bias | A risk of bias that raises some doubt about the results      | A low or unclear risk of bias for all key domains | Most information is obtained from trials at low or unclear risk of bias                                              |
| High risk of bias    | Bias may substantially alter the results                     | A high risk of bias for one or more key domains   | The proportion of information from trials at high risk of bias is sufficient to affect the interpretation of results |





## Supplemental 5.2 NEWCASTLE - OTTAWA QUALITY ASSESSMENT SCALE FOR COHORT STUDIES

Note: A study can be awarded a maximum of one star for each numbered item within the Selection and Outcome categories. A maximum of two stars are possible for Comparability.

### Selection

#### 1) Representativeness of the exposed cohort

- a) truly representative of the average \_\_\_\_\_ (describe) in the community \*
- b) somewhat representative of the average \_\_\_\_\_ (describe) in the community \*
- c) selected group of users, e.g., nurses and volunteers
- d) no description of the derivation of the cohort

#### 2) Selection of the non-exposed cohort

- a) drawn from the same community as the exposed cohort \*
- b) drawn from a different source
- c) no description of the derivation of the non-exposed cohort

#### 3) Ascertainment of exposure

- a) secure record (e.g., surgical records) \*
- b) structured interview \*
- c) written self-report
- d) no description

#### 4) Demonstration that the outcome of interest was not present at the start of the study

- a) yes \*
- b) no

### Comparability

#### 1) Comparability of cohorts based on the design or analysis

- a) study controls for \_\_\_\_\_ (select the most important factor) \*
- b) study controls for any additional factor \* (This criteria could be modified to indicate a specific control for a second important factor.)

### Outcome

#### 1) Assessment of outcome

- a) independent blinded assessment \*
- b) record linkage \*
- c) self-report
- d) no description

#### 2) Was the follow-up period long enough for outcomes to occur

- a) yes (selected an adequate follow-up period for the outcome of interest) \*
- b) no

#### 3) Adequacy of the follow-up of cohorts

- a) complete follow up - all subjects accounted for \*
- b) subjects lost to follow-up, unlikely to introduce bias - small number lost - > \_\_\_\_ % (select an adequate %) follow-up, or description provided of those individuals lost to follow-up) \*
- c) follow-up rate < \_\_\_\_ % (select an adequate %) and no description of those individuals lost to follow-up
- d) no statement



## Supplemental 5.4 NEWCASTLE - OTTAWA QUALITY ASSESSMENT SCALE FOR CASE CONTROL STUDIES

Note: A study can be awarded a maximum of one star for each numbered item within the Selection and Exposure categories. A maximum of two stars is possible for Comparability.

### Selection

1) Is the case definition adequate?

- a) yes, with independent validation \*
- b) yes, e.g., record linkage or based on self-reports
- c) no description

2) Representativeness of the cases

- a) consecutive or obviously representative series of cases \*
- b) potential for selection bias or not stated

3) Selection of Controls

- a) community controls \*
- b) hospital controls
- c) no description

4) Definition of Controls

- a) no history of disease (endpoint)
- b) no description of the source

### Comparability

1) Comparability of cases and controls based on the design or analysis

- a) study controls for \_\_\_\_\_ (Select the most important factor.) \*
- b) study controls for any additional factor \* (This criteria could be modified to indicate a specific control for a second important factor.)

### Exposure

1) Ascertainment of exposure

- a) secure record (e.g., surgical records) \*
- b) structured interview where the interviewer was blinded to the case/control status \*
- c) interviewer was not blinded to the case/control status
- d) written self-report or medical record only
- e) no description

2) Same method of ascertainment for cases and controls

- a) yes \*
- b) no

3) Non-response rate

- a) same rate for both groups \*
- b) non-respondents described
- c) rates differed and no designation was provided

1  
2  
3  
4  
5  
6  
7  
8

### Supplemental Table 6. The GRADE approach

9  
10  
11  
12  
13  
14  
15  
16  
17  
18  
19

#### Supplemental Table 6.1 The summary of findings table

| Outcomes | Illustrates comparative risks<br>(95% CI) |                               | Relative<br>effect<br>(95% CI) | No. of<br>Participants<br>(studies)<br>Follow up | Quality of<br>the<br>evidence<br>(GRADE) | Overall<br>results |
|----------|-------------------------------------------|-------------------------------|--------------------------------|--------------------------------------------------|------------------------------------------|--------------------|
|          | Assumed risk<br>Group 1                   | Corresponding risk<br>Group 2 |                                |                                                  |                                          |                    |
|          |                                           |                               |                                |                                                  |                                          |                    |
|          |                                           |                               |                                |                                                  |                                          |                    |
|          |                                           |                               |                                |                                                  |                                          |                    |
|          |                                           |                               |                                |                                                  |                                          |                    |

20  
21  
22  
23

#### Supplemental Table 6.2 GRADE evidence profile

| Quality assessment |        |                    |               |              |             |                         | No. of patients |         | Effect                  | Quality |
|--------------------|--------|--------------------|---------------|--------------|-------------|-------------------------|-----------------|---------|-------------------------|---------|
| No. of<br>studies  | Design | Risk<br>of<br>bias | Inconsistency | Indirectness | Imprecision | Other<br>considerations | Group<br>1      | Group 2 | Relative<br>(95%<br>CI) |         |
| Outcome 1          |        |                    |               |              |             |                         |                 |         |                         |         |
|                    |        |                    |               |              |             |                         |                 |         |                         |         |
| Outcome 2          |        |                    |               |              |             |                         |                 |         |                         |         |
|                    |        |                    |               |              |             |                         |                 |         |                         |         |
| Outcome 3          |        |                    |               |              |             |                         |                 |         |                         |         |
|                    |        |                    |               |              |             |                         |                 |         |                         |         |
| Outcome 4          |        |                    |               |              |             |                         |                 |         |                         |         |
|                    |        |                    |               |              |             |                         |                 |         |                         |         |

24  
25  
26  
27  
28  
29  
30  
31  
32  
33  
34  
35  
36  
37  
38  
39  
40  
41  
42  
43  
44  
45  
46  
47  
48  
49  
50  
51  
52  
53  
54  
55  
56  
57  
58  
59  
60

**Supplemental Table 6.3 Quality of evidence grades**

| Grade    | Definition                                                                                                                                                     |
|----------|----------------------------------------------------------------------------------------------------------------------------------------------------------------|
| High     | We are very confident that the true effect lies is similar to the estimate of the effect.                                                                      |
| Moderate | We are moderately confident in the effect estimate: the true effect is likely to be close to the estimate of the effect, but it may be substantially different |
| Low      | Our confidence in the effect estimate is limited: the true effect may be substantially different from the estimate of the effect.                              |
| Very Low | We have very little confidence in the effect estimate: the true effect is likely to be substantially different from the estimate of the effect.                |

**Supplemental Table 6.4 Factors that may reduce the quality of the evidence**

| Factor                                                      | Consequence     |
|-------------------------------------------------------------|-----------------|
| Limitations in the study design or execution (risk of bias) | ↓ 1 or 2 levels |
| Inconsistency of the results                                | ↓ 1 or 2 levels |
| Indirectness of the evidence                                | ↓ 1 or 2 levels |
| Imprecision                                                 | ↓ 1 or 2 levels |
| Publication bias                                            | ↓ 1 or 2 levels |

**Supplemental Table 6.5 Factors that may increase the quality of the evidence**

| Factor                                                                                                               | Consequence     |
|----------------------------------------------------------------------------------------------------------------------|-----------------|
| Large magnitude of effect                                                                                            | ↑ 1 or 2 levels |
| All plausible confounding factors would reduce the described effect or increase the effect if no effect was observed | ↑ 1 level       |
| Dose-response gradient                                                                                               | ↑ 1 level       |

# Reporting checklist for protocol of a systematic review.

Based on the PRISMA-P guidelines.

## Instructions to authors

Complete this checklist by entering the page numbers from your manuscript where readers will find each of the items listed below.

Your article may not currently address all the items on the checklist. Please modify your text to include the missing information. If you are certain that an item does not apply, please write "n/a" and provide a short explanation.

Upload your completed checklist as an extra file when you submit to a journal.

In your methods section, say that you used the PRISMA-Preporting guidelines, and cite them as:

Moher D, Shamseer L, Clarke M, Ghersi D, Liberati A, Petticrew M, Shekelle P, Stewart LA. Preferred Reporting Items for Systematic Review and Meta-Analysis Protocols (PRISMA-P) 2015 statement. Syst Rev. 2015;4(1):1.

|                     |                     | Reporting Item                                                                                                                            | Page Number |
|---------------------|---------------------|-------------------------------------------------------------------------------------------------------------------------------------------|-------------|
| <b>Title</b>        |                     |                                                                                                                                           |             |
| Identification      | <a href="#">#1a</a> | Identify the report as a protocol of a systematic review                                                                                  | 1           |
| Update              | <a href="#">#1b</a> | If the protocol is for an update of a previous systematic review, identify as such                                                        | 2           |
| <b>Registration</b> |                     |                                                                                                                                           |             |
|                     | <a href="#">#2</a>  | If registered, provide the name of the registry (such as PROSPERO) and registration number                                                | 3           |
| <b>Authors</b>      |                     |                                                                                                                                           |             |
| Contact             | <a href="#">#3a</a> | Provide name, institutional affiliation, e-mail address of all protocol authors; provide physical mailing address of corresponding author | 1           |

|    |                                 |                                          |                                                                                                                                                                                                                               |      |
|----|---------------------------------|------------------------------------------|-------------------------------------------------------------------------------------------------------------------------------------------------------------------------------------------------------------------------------|------|
| 1  | Contribution                    | <a href="#">#3b</a>                      | Describe contributions of protocol authors and identify the guarantor of the review                                                                                                                                           | 12   |
| 2  |                                 |                                          |                                                                                                                                                                                                                               |      |
| 3  |                                 |                                          |                                                                                                                                                                                                                               |      |
| 4  |                                 |                                          |                                                                                                                                                                                                                               |      |
| 5  | <b>Amendments</b>               |                                          |                                                                                                                                                                                                                               |      |
| 6  |                                 |                                          |                                                                                                                                                                                                                               |      |
| 7  |                                 | <a href="#">#4</a>                       | If the protocol represents an amendment of a previously completed or published protocol, identify as such and list changes; otherwise, state plan for documenting important protocol amendments                               | 2    |
| 8  |                                 |                                          |                                                                                                                                                                                                                               |      |
| 9  |                                 |                                          |                                                                                                                                                                                                                               |      |
| 10 |                                 |                                          |                                                                                                                                                                                                                               |      |
| 11 |                                 |                                          |                                                                                                                                                                                                                               |      |
| 12 |                                 |                                          |                                                                                                                                                                                                                               |      |
| 13 |                                 |                                          |                                                                                                                                                                                                                               |      |
| 14 | <b>Support</b>                  |                                          |                                                                                                                                                                                                                               |      |
| 15 |                                 |                                          |                                                                                                                                                                                                                               |      |
| 16 | Sources                         | <a href="#">#5a</a>                      | Indicate sources of financial or other support for the review                                                                                                                                                                 | 1    |
| 17 |                                 |                                          |                                                                                                                                                                                                                               |      |
| 18 | Sponsor                         | <a href="#">#5b</a>                      | Provide name for the review funder and / or sponsor                                                                                                                                                                           | 1    |
| 19 |                                 |                                          |                                                                                                                                                                                                                               |      |
| 20 |                                 |                                          |                                                                                                                                                                                                                               |      |
| 21 | Role of sponsor or funder       | <a href="#">#5c</a>                      | Describe roles of funder(s), sponsor(s), and / or institution(s), if any, in developing the protocol                                                                                                                          | 1    |
| 22 |                                 |                                          |                                                                                                                                                                                                                               |      |
| 23 |                                 |                                          |                                                                                                                                                                                                                               |      |
| 24 |                                 |                                          |                                                                                                                                                                                                                               |      |
| 25 | <b>Introduction</b>             |                                          |                                                                                                                                                                                                                               |      |
| 26 |                                 |                                          |                                                                                                                                                                                                                               |      |
| 27 | Rationale                       | <a href="#">#6</a>                       | Describe the rationale for the review in the context of what is already known                                                                                                                                                 | 5-6  |
| 28 |                                 |                                          |                                                                                                                                                                                                                               |      |
| 29 |                                 |                                          |                                                                                                                                                                                                                               |      |
| 30 |                                 |                                          |                                                                                                                                                                                                                               |      |
| 31 | Objectives                      | <a href="#">#7</a>                       | Provide an explicit statement of the question(s) the review will address with reference to participants, interventions, comparators, and outcomes (PICO)                                                                      | 6    |
| 32 |                                 |                                          |                                                                                                                                                                                                                               |      |
| 33 |                                 |                                          |                                                                                                                                                                                                                               |      |
| 34 |                                 |                                          |                                                                                                                                                                                                                               |      |
| 35 |                                 |                                          |                                                                                                                                                                                                                               |      |
| 36 | <b>Methods</b>                  |                                          |                                                                                                                                                                                                                               |      |
| 37 |                                 |                                          |                                                                                                                                                                                                                               |      |
| 38 | Eligibility criteria            | <a href="#">#8</a>                       | Specify the study characteristics (such as PICO, study design, setting, time frame) and report characteristics (such as years considered, language, publication status) to be used as criteria for eligibility for the review | 7-8  |
| 39 |                                 |                                          |                                                                                                                                                                                                                               |      |
| 40 |                                 |                                          |                                                                                                                                                                                                                               |      |
| 41 |                                 |                                          |                                                                                                                                                                                                                               |      |
| 42 |                                 |                                          |                                                                                                                                                                                                                               |      |
| 43 |                                 |                                          |                                                                                                                                                                                                                               |      |
| 44 |                                 |                                          |                                                                                                                                                                                                                               |      |
| 45 | Information sources             | <a href="#">#9</a>                       | Describe all intended information sources (such as electronic databases, contact with study authors, trial registers or other grey literature sources) with planned dates of coverage                                         | 6-7  |
| 46 |                                 |                                          |                                                                                                                                                                                                                               |      |
| 47 |                                 |                                          |                                                                                                                                                                                                                               |      |
| 48 |                                 |                                          |                                                                                                                                                                                                                               |      |
| 49 |                                 |                                          |                                                                                                                                                                                                                               |      |
| 50 |                                 |                                          |                                                                                                                                                                                                                               |      |
| 51 | Search strategy                 | <a href="#">#10</a>                      | Present draft of search strategy to be used for at least one electronic database, including planned limits, such that it could be repeated                                                                                    | 7    |
| 52 |                                 |                                          |                                                                                                                                                                                                                               |      |
| 53 |                                 |                                          |                                                                                                                                                                                                                               |      |
| 54 |                                 |                                          |                                                                                                                                                                                                                               |      |
| 55 |                                 |                                          |                                                                                                                                                                                                                               |      |
| 56 | Study records - data management | <a href="#">#11</a><br><a href="#">a</a> | Describe the mechanism(s) that will be used to manage records and data throughout the review                                                                                                                                  | 2, 8 |
| 57 |                                 |                                          |                                                                                                                                                                                                                               |      |
| 58 |                                 |                                          |                                                                                                                                                                                                                               |      |
| 59 |                                 |                                          |                                                                                                                                                                                                                               |      |
| 60 |                                 |                                          |                                                                                                                                                                                                                               |      |

|    |                    |                     |                                                                                 |       |
|----|--------------------|---------------------|---------------------------------------------------------------------------------|-------|
| 1  | Study records -    | <a href="#">#11</a> | State the process that will be used for selecting studies (such                 | 8     |
| 2  | selection process  | <a href="#">b</a>   | as two independent reviewers) through each phase of the                         |       |
| 3  |                    |                     | review (that is, screening, eligibility and inclusion in meta-                  |       |
| 4  |                    |                     | analysis)                                                                       |       |
| 5  |                    |                     |                                                                                 |       |
| 6  |                    |                     |                                                                                 |       |
| 7  |                    |                     |                                                                                 |       |
| 8  | Study records -    | <a href="#">#11</a> | Describe planned method of extracting data from reports                         | 8-9   |
| 9  | data collection    | <a href="#">c</a>   | (such as piloting forms, done independently, in duplicate),                     |       |
| 10 | process            |                     | any processes for obtaining and confirming data from                            |       |
| 11 |                    |                     | investigators                                                                   |       |
| 12 |                    |                     |                                                                                 |       |
| 13 |                    |                     |                                                                                 |       |
| 14 | Data items         | <a href="#">#12</a> | List and define all variables for which data will be sought                     | 8-9   |
| 15 |                    |                     | (such as PICO items, funding sources), any pre-planned data                     |       |
| 16 |                    |                     | assumptions and simplifications                                                 |       |
| 17 |                    |                     |                                                                                 |       |
| 18 |                    |                     |                                                                                 |       |
| 19 |                    |                     |                                                                                 |       |
| 20 | Outcomes and       | <a href="#">#13</a> | List and define all outcomes for which data will be sought,                     | 8-9   |
| 21 | prioritization     |                     | including prioritization of main and additional outcomes, with                  |       |
| 22 |                    |                     | rationale                                                                       |       |
| 23 |                    |                     |                                                                                 |       |
| 24 |                    |                     |                                                                                 |       |
| 25 | Risk of bias in    | <a href="#">#14</a> | Describe anticipated methods for assessing risk of bias of                      | 9     |
| 26 | individual studies |                     | individual studies, including whether this will be done at the                  |       |
| 27 |                    |                     | outcome or study level, or both; state how this information                     |       |
| 28 |                    |                     | will be used in data synthesis                                                  |       |
| 29 |                    |                     |                                                                                 |       |
| 30 |                    |                     |                                                                                 |       |
| 31 |                    |                     |                                                                                 |       |
| 32 | Data synthesis     | <a href="#">#15</a> | Describe criteria under which study data will be quantitatively                 | 10    |
| 33 |                    | <a href="#">a</a>   | synthesised                                                                     |       |
| 34 |                    |                     |                                                                                 |       |
| 35 |                    |                     |                                                                                 |       |
| 36 | Data synthesis     | <a href="#">#15</a> | If data are appropriate for quantitative synthesis, describe                    | 10    |
| 37 |                    | <a href="#">b</a>   | planned summary measures, methods of handling data and                          |       |
| 38 |                    |                     | methods of combining data from studies, including any                           |       |
| 39 |                    |                     | planned exploration of consistency (such as I <sup>2</sup> , Kendall's $\tau$ ) |       |
| 40 |                    |                     |                                                                                 |       |
| 41 |                    |                     |                                                                                 |       |
| 42 |                    |                     |                                                                                 |       |
| 43 | Data synthesis     | <a href="#">#15</a> | Describe any proposed additional analyses (such as                              | 10-11 |
| 44 |                    | <a href="#">c</a>   | sensitivity or subgroup analyses, meta-regression)                              |       |
| 45 |                    |                     |                                                                                 |       |
| 46 |                    |                     |                                                                                 |       |
| 47 | Data synthesis     | <a href="#">#15</a> | If quantitative synthesis is not appropriate, describe the type                 | 10    |
| 48 |                    | <a href="#">d</a>   | of summary planned                                                              |       |
| 49 |                    |                     |                                                                                 |       |
| 50 |                    |                     |                                                                                 |       |
| 51 | Meta-bias(es)      | <a href="#">#16</a> | Specify any planned assessment of meta-bias(es) (such as                        | 10    |
| 52 |                    |                     | publication bias across studies, selective reporting within                     |       |
| 53 |                    |                     | studies)                                                                        |       |
| 54 |                    |                     |                                                                                 |       |
| 55 |                    |                     |                                                                                 |       |
| 56 | Confidence in      | <a href="#">#17</a> | Describe how the strength of the body of evidence will be                       | 11    |
| 57 | cumulative         |                     | assessed (such as GRADE)                                                        |       |
| 58 | evidence           |                     |                                                                                 |       |
| 59 |                    |                     |                                                                                 |       |
| 60 |                    |                     |                                                                                 |       |



1 None The PRISMA-P checklist is distributed under the terms of the Creative Commons Attribution  
2 License CC-BY 4.0. This checklist can be completed online using <https://www.goodreports.org/>, a tool  
3 made by the [EQUATOR Network](#) in collaboration with [Penelope.ai](#)  
4  
5  
6  
7  
8  
9  
10  
11  
12  
13  
14  
15  
16  
17  
18  
19  
20  
21  
22  
23  
24  
25  
26  
27  
28  
29  
30  
31  
32  
33  
34  
35  
36  
37  
38  
39  
40  
41  
42  
43  
44  
45  
46  
47  
48  
49  
50  
51  
52  
53  
54  
55  
56  
57  
58  
59  
60

For peer review only

# BMJ Open

## Platelet Transfusion for Neonates with Thrombocytopenia: Protocol for a Systematic Review

|                                 |                                                                                                                                                                                                                                                                                                                                                                                                                                                                                                                                                                                                                                                                                                                                                                                                                                                                                                                                                                                               |
|---------------------------------|-----------------------------------------------------------------------------------------------------------------------------------------------------------------------------------------------------------------------------------------------------------------------------------------------------------------------------------------------------------------------------------------------------------------------------------------------------------------------------------------------------------------------------------------------------------------------------------------------------------------------------------------------------------------------------------------------------------------------------------------------------------------------------------------------------------------------------------------------------------------------------------------------------------------------------------------------------------------------------------------------|
| Journal:                        | <i>BMJ Open</i>                                                                                                                                                                                                                                                                                                                                                                                                                                                                                                                                                                                                                                                                                                                                                                                                                                                                                                                                                                               |
| Manuscript ID                   | bmjopen-2020-039132.R2                                                                                                                                                                                                                                                                                                                                                                                                                                                                                                                                                                                                                                                                                                                                                                                                                                                                                                                                                                        |
| Article Type:                   | Protocol                                                                                                                                                                                                                                                                                                                                                                                                                                                                                                                                                                                                                                                                                                                                                                                                                                                                                                                                                                                      |
| Date Submitted by the Author:   | 20-Sep-2020                                                                                                                                                                                                                                                                                                                                                                                                                                                                                                                                                                                                                                                                                                                                                                                                                                                                                                                                                                                   |
| Complete List of Authors:       | Liu, Dengjun; Sichuan University West China Second University Hospital, Department of Pediatrics<br>Wu, Jinlin; Sichuan University West China Second University Hospital, Department of Pediatrics; Sichuan University, Key Laboratory of Birth Defects and Related Diseases of Women and Children Ministry of Education<br>Xiong, tao; Sichuan University West China Second University Hospital, Department of Pediatrics; Sichuan University, Key Laboratory of Birth Defects and Related Diseases of Women and Children Ministry of Education<br>Yue, Yan; Sichuan University West China Second University Hospital, Department of Pediatrics; Sichuan University, Key Laboratory of Birth Defects and Related Diseases of Women and Children Ministry of Education<br>Tang, Jun; Sichuan University West China Second University Hospital, Department of Pediatrics; Sichuan University, Key Laboratory of Birth Defects and Related Diseases of Women and Children Ministry of Education |
| <b>Primary Subject Heading</b>: | Paediatrics                                                                                                                                                                                                                                                                                                                                                                                                                                                                                                                                                                                                                                                                                                                                                                                                                                                                                                                                                                                   |
| Secondary Subject Heading:      | Haematology (incl blood transfusion), Intensive care                                                                                                                                                                                                                                                                                                                                                                                                                                                                                                                                                                                                                                                                                                                                                                                                                                                                                                                                          |
| Keywords:                       | Blood bank & transfusion medicine < HAEMATOLOGY, Bleeding disorders & coagulopathies < HAEMATOLOGY, Neonatal intensive & critical care < INTENSIVE & CRITICAL CARE                                                                                                                                                                                                                                                                                                                                                                                                                                                                                                                                                                                                                                                                                                                                                                                                                            |
|                                 |                                                                                                                                                                                                                                                                                                                                                                                                                                                                                                                                                                                                                                                                                                                                                                                                                                                                                                                                                                                               |

SCHOLARONE™  
Manuscripts



I, the Submitting Author has the right to grant and does grant on behalf of all authors of the Work (as defined in the below author licence), an exclusive licence and/or a non-exclusive licence for contributions from authors who are: i) UK Crown employees; ii) where BMJ has agreed a CC-BY licence shall apply, and/or iii) in accordance with the terms applicable for US Federal Government officers or employees acting as part of their official duties; on a worldwide, perpetual, irrevocable, royalty-free basis to BMJ Publishing Group Ltd ("BMJ") its licensees and where the relevant Journal is co-owned by BMJ to the co-owners of the Journal, to publish the Work in this journal and any other BMJ products and to exploit all rights, as set out in our [licence](#).

The Submitting Author accepts and understands that any supply made under these terms is made by BMJ to the Submitting Author unless you are acting as an employee on behalf of your employer or a postgraduate student of an affiliated institution which is paying any applicable article publishing charge ("APC") for Open Access articles. Where the Submitting Author wishes to make the Work available on an Open Access basis (and intends to pay the relevant APC), the terms of reuse of such Open Access shall be governed by a Creative Commons licence – details of these licences and which [Creative Commons](#) licence will apply to this Work are set out in our licence referred to above.

Other than as permitted in any relevant BMJ Author's Self Archiving Policies, I confirm this Work has not been accepted for publication elsewhere, is not being considered for publication elsewhere and does not duplicate material already published. I confirm all authors consent to publication of this Work and authorise the granting of this licence.

1  
2  
3  
4 1 **Platelet Transfusion for Neonates with Thrombocytopaenia: Protocol for a**  
5  
6 2 **Systematic Review**

7  
8 3 Dengjun Liu<sup>1,2#</sup>, MD; Jinlin Wu<sup>1,2#</sup>, MD, PhD; Tao Xiong<sup>1,2\*</sup>, MD, PhD; Yan Yue<sup>1,2</sup>,  
9 4 MD; and Jun Tang<sup>1,2</sup>, MD, PhD

10  
11 5  
12 6 <sup>1</sup> Department of Pediatrics, West China Second University Hospital, Sichuan  
13 7 University, Chengdu, China

14 8 <sup>2</sup> Key Laboratory of Birth Defects and Related Diseases of Women and Children (Sichuan  
15 9 University) Ministry of Education

16 10 Dengjun Liu: dengjunliu97@163.com

17 11 Jinlin Wu: 373053785@qq.com

18 12 Yan Yue: yueyan\_1994@163.com

19 13 Jun Tang: tj1234753@sina.com

20 14 **Funding**

21 15 This study is supported by grants from the Science and Technology Bureau of Sichuan  
22 16 Province (2020YJ0298 and 2020YJ0236); Health Commission of Sichuan Province  
23 17 (20PJ071); Deep Underground Space Medical Center (No. DUGM201809); and the  
24 18 Fundamental Research Funds for the Central Universities (SCU2019C4005).

25 19  
26 20 # Joint first authors: Dengjun Liu and Jinlin Wu

27 21  
28 22 **\* Correspondence**

29 23 Dr. Tao Xiong, No. 20, Section Three, South Renmin Road, Chengdu, China

30 24 Tel: 15126616986

31 25 Email: tao\_xiong@126.com

32 26  
33 27 Word count: 2118

## 28 **ABSTRACT**

### 29 **Introduction**

30 Thrombocytopenia is one of the most common haemostatic abnormalities among  
31 neonates. It affects approximately one-quarter of neonates admitted into neonatal  
32 intensive care units (NICUs) and may lead to a high risk of bleeding and mortality,  
33 which are substantial causes for concern by neonatologists. Platelet transfusion (PT) is  
34 a specific treatment for thrombocytopenia. To date, PT thresholds are diverse since  
35 the associations between low platelet count and negative outcomes are not clear. We  
36 propose this protocol for a systematic review to collect and assess evidence  
37 concerning the best PT threshold to reduce mortality, bleeding and major morbidity  
38 among neonates with thrombocytopenia.

### 39 **Methods and analysis**

40 The systematic review will be performed according to the Cochrane Handbook for  
41 Systematic Review of Interventions, the Preferred Reporting Items for Systematic  
42 Review and Meta-Analysis (PRISMA) statement, and the Grading of  
43 Recommendations Assessment, Development and Evaluation (GRADE) system. Two  
44 independent researchers will perform the study selection, data extraction/coding,  
45 quality assessment and further analyses of the included studies, with disagreements  
46 being resolved by a third researcher. A systematic search of the literature will be  
47 conducted in the PubMed, Cochrane Library, and Embase databases from database  
48 inception through October 13, 2020. All randomized controlled trials (RCTs), cohort  
49 studies and case-control studies will be included without any restrictions regarding  
50 publication date or language. The primary outcomes will comprise in-hospital  
51 mortality and bleeding episodes. Endnote X9 and Review Manager V.5.3 software  
52 will be used to manage the selection process and statistical analysis, respectively. If  
53 the included studies are sufficient and homogeneous for any of the outcomes, a  
54 quantitative synthesis (meta-analysis) may be performed. Otherwise, we will conduct  
55 a narrative systematic review of the results.

### 56 **Ethics and dissemination**

1  
2  
3  
4 57 Ethical approval is not required for this study because the data will be obtained from  
5  
6 58 published studies and will not include individual patient data. The results of this study  
7  
8 59 are anticipated to be published in a peer-reviewed journal.  
9  
10 60 **PROSPERO registration number:** CRD42020169262.  
11  
12  
13  
14  
15  
16  
17  
18  
19  
20  
21  
22  
23  
24  
25  
26  
27  
28  
29  
30  
31  
32  
33  
34  
35  
36  
37  
38  
39  
40  
41  
42  
43  
44  
45  
46  
47  
48  
49  
50  
51  
52  
53  
54  
55  
56  
57  
58  
59  
60

For peer review only

1  
2  
3  
4  
5  
6  
7  
8  
9  
10  
11  
12  
13  
14  
15  
16  
17  
18  
19  
20  
21  
22  
23  
24  
25  
26  
27  
28  
29  
30  
31  
32  
33  
34  
35  
36  
37  
38  
39  
40  
41  
42  
43  
44  
45  
46  
47  
48  
49  
50  
51  
52  
53  
54  
55  
56  
57  
58  
59  
60

61 **Strengths and limitations of this study**

- 62 ▶ This study will be the most recent systematic review to evaluate the PT threshold
- 63 for neonates with thrombocytopenia based on recent evidence. We will include
- 64 RCTs and observational studies and separately combine the results of each study
- 65 design.
- 66 ▶ Comprehensive and extensive analyses of the outcomes, including in-hospital
- 67 mortality, bleeding events, morbidity, adverse effects of transfusion, and length of
- 68 stay, will be performed.
- 69 ▶ The review will be performed according to the Cochrane Handbook and the
- 70 PRISMA statement.
- 71 ▶ Formal risk of bias analyses will be performed. The quality of evidence will be
- 72 affected by the bias in original studies.
- 73 ▶ The results of this systematic review may be helpful for both clinical decisions
- 74 and further study.

## 76 **BACKGROUND**

77 Thrombocytopenia, defined as a platelet count less than 150 000/ $\mu$ L, is a common  
78 haemostatic abnormality among neonates, particularly premature infants.<sup>1 2</sup> The  
79 aetiology of thrombocytopenia is complicated and involves multiple factors,  
80 including abnormal immunity, infection, and asphyxia.<sup>3-7</sup> Thrombocytopenia may be  
81 a sole clinical manifestation of alloimmune thrombocytopenia or a complication of  
82 other diseases, such as intrauterine growth restriction, polycythaemia, sepsis or  
83 necrotizing enterocolitis.<sup>3-5 8</sup> Approximately 9.4% to 35% of neonates admitted to  
84 neonatal intensive care units (NICUs) develop thrombocytopenia.<sup>5 9-12</sup> Theoretically,  
85 neonates with thrombocytopenia may develop a high risk of bleeding and mortality.  
86 This increased risk is attributed to the important role of platelets in the whole process  
87 of haemostasis, and thrombocytopenia may lead to dysfunctional haemostasis. Thus,  
88 this condition is a significant and unresolved problem for neonatologists.

89 Platelet transfusion (PT) is commonly used as a prophylactic and therapeutic  
90 treatment for bleeding episodes in neonates with thrombocytopenia. To date, the  
91 relationship between a low platelet count and major bleeding or mortality is not clear,  
92 and the efficacy of PT remains controversial, as supported by the evidence from  
93 recent trials.<sup>5 13-15</sup> Current guidelines generally recommend prophylactic PT for  
94 neonates with thrombocytopenia.<sup>16-19</sup> The recommended thresholds vary from 20  
95 000/ $\mu$ L to 30 000/ $\mu$ L<sup>15-17 20-25</sup> for non-bleeding stable neonates, while the thresholds  
96 range from 30 000/ $\mu$ L to 50 000/ $\mu$ L<sup>15 21 24-26</sup> for non-bleeding unstable neonates.  
97 These guidelines are consensus guidelines rather than evidence-based guidelines.<sup>19 27</sup>  
98 Thus, a wide range of PT thresholds has been reported among different NICUs.<sup>28 29</sup>

99 Theoretically, compared with that at a low threshold, PT at a high threshold may  
100 reduce the risks of severe thrombocytopenia, subsequent mortality and bleeding  
101 episodes. Surprisingly, a recent randomized controlled trial (RCT) reported that  
102 compared with PT at a low threshold, PT at a high threshold increased the mortality  
103 rate and bleeding events in preterm infants with severe thrombocytopenia.<sup>14</sup> On the  
104 other hand, as an invasive therapy, PT is associated with some acknowledged adverse



1  
2  
3  
4 105 events, including transfusion-transmitted infections, bacterial sepsis, febrile  
5  
6 106 nonhaemolytic transfusion reaction, transfusion-associated circulatory overload,  
7  
8 107 transfusion-related acute lung injury, and immune-mediated platelet destruction.<sup>3 30-32</sup>  
9  
10 108 Furthermore, PT has a higher risk of these adverse events than transfusions of other  
11  
12 109 blood products due to its pro-inflammatory function.

13  
14 110 Recently, additional clinical trials regarding PT in neonates with  
15  
16 111 thrombocytopaenia have been completed. Several reports have argued that a lower  
17  
18 112 transfusion threshold may reduce the incidence of unnecessary transfusions and  
19  
20 113 financial costs without the extra risks of bleeding and mortality.<sup>13 15</sup> We will perform  
21  
22 114 this systematic review and meta-analysis to summarize current evidence for PT in  
23  
24 115 neonates and assess the safety and best threshold for PT.

25  
26 116

## 27 117 **Objectives**

28  
29 118 We propose this protocol for a systematic review to collect and assess the evidence  
30  
31 119 concerning the best threshold for PT to reduce mortality, bleeding and major  
32  
33 120 morbidity among neonates with thrombocytopaenia. We will further explore the best  
34  
35 121 thresholds for PT in neonates with thrombocytopaenia due to various causes and  
36  
37 122 specific clinical characteristics. Furthermore, the safety of PT will be assessed by  
38  
39 123 comparing its side effects at different thresholds.

40  
41 124

## 42 125 **METHODS AND ANALYSIS**

43  
44 126 This protocol will be conducted based on the Preferred Reporting Items for  
45  
46 127 Systematic Review and Meta-Analysis Protocol (PRISMA-P) 2015 guidelines,<sup>33</sup> and a  
47  
48 128 subsequent systematic review will be performed according to the Cochrane Handbook  
49  
50 129 for Systematic Review of Interventions,<sup>34</sup> the PRISMA statement,<sup>35</sup> and the Grading  
51  
52 130 of Recommendations Assessment, Development and Evaluation (GRADE)  
53  
54 131 approach.<sup>36</sup>

55  
56 132

## 57 133 **Data sources and search strategy**

1  
2  
3  
4 134 Comprehensive searches will be separately performed by two independent researchers  
5  
6 135 in the PubMed, Cochrane Library, and Embase databases from database inception  
7  
8 136 through October 13, 2020. No restrictions on language will be applied to the search.

9  
10 137 We will use the following keywords for the search and selection of relevant studies.

11  
12 138 1. For neonates, the following combination of search terms will be used: “infant” or  
13  
14 139 “newborn” or “neonatal” or “neonate” or “preterm” or “premature” or “neonatology”.

15  
16 140 2. For thrombocytopaenia, the following search terms will be used:

17  
18 141 “thrombocytopaenia” or “thrombocytopaenic” or “NT”.

19  
20 142 3. For PT, the following search terms will be used: “platelet transfusion” or “platelet  
21  
22 143 infusion therapy” or “platelet administration” or “PT”.

23  
24 144 4. Steps 1, 2 and 3 will be combined with “and”.

25  
26 145 The detailed search strategy is shown in supplemental table 1.

27  
28 146 Furthermore, we will manually check the references of all identified trials,  
29  
30 147 relevant systematic reviews, and current treatment guidelines to avoid missing  
31  
32 148 important studies. Missing data will be handled by contacting relevant investigators  
33  
34 149 for unreported materials or additional details.

35  
36 150

### 37 151 **Study eligibility**

#### 38 39 152 Types of studies

40  
41 153 We will include RCTs, cohort studies, and case-control studies and exclude animal  
42  
43 154 studies, in vitro studies, cross-sectional studies, case reports, case series, and  
44  
45 155 secondary or tertiary articles (systematic reviews and meta-analyses).

46  
47 156 If enough data are available from only RCTs that will answer the questions posed  
48  
49 157 by this review, we will report only data from RCTs.

#### 50 51 158 Types of participants

52  
53 159 Newborn infants with thrombocytopaenia (platelet counts < 150 000/μL, the diagnosis  
54  
55 160 was established at less than 28 postnatal days, and the follow-up time could extend to  
56  
57 161 a postnatal age > 28 days) who were admitted to the NICU will be included. We will  
58  
59 162 exclude studies of infants with congenital malformations.<sup>14</sup>

1  
2  
3  
4 163 Types of interventions and comparators

5 164 The intervention of the included studies is PT for thrombocytopenia. We will  
6  
7 165 compare the effects of different transfusion platelet count thresholds and record the  
8  
9 166 type and dose of the platelet component received.

10  
11 167 Types of outcomes

12  
13 168 The primary outcome will be in-hospital mortality or bleeding episodes [including  
14  
15 169 intraventricular haemorrhage (IVH), intracranial haemorrhage (ICH), pulmonary  
16  
17 170 haemorrhage (PH), frank rectal bleeding, and other bleeding].

18  
19 171 The secondary outcomes will be morbidity [including patent ductus arteriosus  
20  
21 172 (PDA), sepsis, necrotizing enterocolitis (NEC), bronchopulmonary dysplasia (BPD),  
22  
23 173 retinopathy of prematurity (ROP), etc.], adverse effects of transfusion, and the length  
24  
25 174 of stay (LOS).<sup>5 14 29 37-39</sup> Detailed descriptions of the outcome measures are provided  
26  
27 175 in supplemental table 2. If the data are sufficient, we will conduct additional analyses  
28  
29 176 according to the severity of the outcomes (for example, severe PV–IVH (grade III or  
30  
31 177 IV). The minimum length of follow-up for assessing these outcomes should include  
32  
33 178 the time point for their diagnosis (for example, the follow-up for BPD should extend  
34  
35 179 to 28 postnatal days). If a similar outcome measure had different follow-up times in  
36  
37 180 different original studies, we will try to manage the data according to the timeline.

38  
39 181 If the studies provide both adjusted and unadjusted results, only the adjusted  
40  
41 182 results will be presented in the review.

42  
43 183

#### 44 184 **Study selection**

45  
46 185 Two researchers will independently screen the titles and abstracts of the references  
47  
48 186 retrieved by the searches. If eligible, the full texts of potential references will be  
49  
50 187 obtained and assessed by the two researchers. Studies approved by both investigators  
51  
52 188 will be included in this meta-analysis. Discrepancies in inclusion and exclusion  
53  
54 189 decisions will be solved by a third senior researcher. Endnote X9 software will be  
55  
56 190 used to track and manage the selection process, and a PRISMA flow diagram will be  
57  
58 191 constructed to depict this process (see supplemental figure 1).

1  
2  
3  
4 192

5 193 **Data extraction**

6  
7 194 Structured extraction sheets (see supplemental tables 3.1-3.3) and Review Manager  
8  
9 195 V.5.3 (Cochrane Collaboration, Oxford, UK) software will be used for data extraction  
10  
11 196 by two independent investigators, and disagreements will be resolved by a third senior  
12  
13 197 researcher. The included data items are as follows:

- 14  
15 198 1. Publication and study details: authors, year of publication, country, study design,  
16  
17 199 and number of participants.  
18  
19 200 2. Clinical characteristics: gestational age (GA), birth weight (BW), platelet count  
20  
21 201 before transfusion or severity of thrombocytopaenia, platelet count thresholds, type  
22  
23 202 and dose of platelet component, and the number of PTs.  
24  
25 203 3. Outcomes: mortality, bleeding episodes, IVH grade, NEC, BPD, ROP, sepsis, and  
26  
27 204 LOS.  
28  
29 205 4. Other information: any sponsorship or funding.

30  
31 206 Attempts will be made to retrieve missing information by contacting relevant  
32  
33 207 investigators for unreported data or additional details.  
34  
35 208

36  
37 209 **Risk of bias in individual studies**

38  
39 210 Risk of bias will be assessed by two independent reviewers, and disagreement will be  
40  
41 211 resolved by a third reviewer.

42  
43 212 For RCTs, the 'Risk of Bias Assessment Tool' in Review Manager V.5.3  
44  
45 213 software (Cochrane Collaboration, UK) will be used. This tool includes random  
46  
47 214 sequence generation (selection bias), allocation concealment (selection bias), blinding  
48  
49 215 of participants and personnel (performance bias), blinding of outcome assessment  
50  
51 216 (detection bias), incomplete outcome data (attrition bias), selective reporting  
52  
53 217 (reporting bias), and other bias. The bias of the included studies will be divided into a  
54  
55 218 high risk of bias, low risk of bias, or unclear risk of bias in each domain (see  
56  
57 219 supplemental table 4).<sup>40</sup>

58  
59 220 The Newcastle-Ottawa scale (NOS) will be used for observational studies in  
60

1  
2  
3  
4 221 terms of selection, comparability, and outcome, with a minimum score of 0 and a  
5  
6 222 maximum score of 9. Trials with scores of 9 points will be graded as high quality, and  
7  
8 223 trials with scores of 1-8 points will be graded as low quality (see supplemental table  
9  
10 224 5).

### 11 225 12 13 226 **Data synthesis**

14  
15 227 When the studies are sufficiently homogeneous for any of the described outcome  
16  
17 228 measures, a quantitative synthesis (meta-analysis) may be performed according to the  
18  
19 229 recommendations of the Cochrane Handbook. If quantitative analysis cannot be  
20  
21 230 performed, a narrative systematic review of the results from the studies included will  
22  
23 231 be conducted, and we will not pool the data from the individual studies.

24  
25 232 For dichotomous data (occurrence of mortality, bleeding events, morbidity,  
26  
27 233 adverse events, etc.), the risk ratio (RR) will be used in the analysis of RCTs and  
28  
29 234 cohort studies, and the odds ratio (OR) will be used for case-control studies. For  
30  
31 235 continuous data (GA, BW, etc.), the mean difference (MD) or standardized mean  
32  
33 236 difference (SMD) with 95% confidence intervals (CIs) will be used to represent the  
34  
35 237 summary statistics of the outcome with the same units or different scales,  
36  
37 238 respectively.

### 38 39 239 40 41 240 **Assessment of heterogeneity**

42  
43 241 The  $\chi^2$  test ( $P \leq 0.1$  indicates substantial or considerable heterogeneity) will be used  
44  
45 242 to determine whether heterogeneity is statistically significant. Additionally, we will  
46  
47 243 assess the degree of statistical heterogeneity by examining  $I^2$ . The data will be pooled  
48  
49 244 by applying a random-effects model following  $I^2 \geq 50\%$  or  $P \leq 0.1$ . Otherwise, the  
50  
51 245 fixed-effects model will be used.

### 52 246 53 54 247 **Sensitivity analysis**

55  
56 248 We will assess the robustness of the results by including or excluding controversial  
57  
58 249 studies, such as low-quality studies or studies with temporal ambiguity (e.g., whether  
59  
60

1  
2  
3  
4 250 the bleeding event occurred after PT is unknown).

5  
6 251

### 7 252 **Subgroup analysis**

9 253 If sufficient data are identified, subgroup analyses will be performed to detect  
11 254 possible heterogeneity based on the following participant characteristics:

13 255 1) GA (<28 w, 28 – 32 w, 32 – 37 w, and >37 w);

15 256 2) BW (<1 000 g, 1 000 – 1 500 g, 1 500 – 2 500 g, and >2 500 g);

17 257 3) the severity of thrombocytopenia [mild (100 000 – 150 000/ $\mu$ L), moderate (50 000  
19 258 – 100 000/ $\mu$ L), and severe (<50 000/ $\mu$ L)];

21 259 4) the platelet count thresholds for PT;

23 260 5) the cause of thrombocytopenia; and

25 261 6) the design of the study (RCTs and cohort studies).

27 262 We will explore the possible heterogeneity among subgroups using  $I^2$  and P  
29 263 values.

31 264

### 33 265 **Quality of the evidence**

35 266 We will use the GRADE approach<sup>36 40</sup> to assess the quality of evidence and propose to  
37 267 present “Summary of findings” tables (see supplemental table 6). We will construct  
39 268 funnel plots and perform the Egger’s test to assess publication bias for each of the  
41 269 pooled outcomes when more than 10 included studies are available. Asymmetry may  
43 270 arise as a result of publication bias or a relationship between the trial size and effect  
45 271 size. Egger’s linear regression analysis will be performed to test for funnel plot  
47 272 asymmetry.

49 273

### 51 274 **Patient and public involvement**

53 275 No patients will be involved.

55 276

### 57 277 **DISCUSSION**

59 278 Due to the limited number of RCTs, observational studies are a great source of  
60

1  
2  
3  
4 279 potentially high-quality data. Furthermore, observational studies have additional  
5  
6 280 benefits that may justify the evidence obtained from RCTs. We will include RCTs and  
7  
8 281 observational studies in this review because of the limited number of relevant RCTs  
9  
10 282 examining neonates with thrombocytopaenia. We will separately combine the results  
11  
12 283 of RCTs and observational studies. To the best of our knowledge, this review will be  
13  
14 284 the most recent systematic review determining the best PT threshold for neonates with  
15  
16 285 thrombocytopaenia who are admitted to NICUs. We expect to provide the best  
17  
18 286 available evidence for neonatologists and guideline developers on PT, which will help  
19  
20 287 both clinical practice and further study design.  
21  
22 288

### 23 289 **Contributors**

24  
25 290 TX contributed to the conception of the study. The framework of the systematic  
26  
27 291 review was developed by all authors. The search strategy was designed by TX and  
28  
29 292 will be completed by YY and DJL, who will further independently screen the relevant  
30  
31 293 records, extract data from the included studies and assess the risk of bias. JLW will  
32  
33 294 perform data synthesis. TX and JT will arbitrate in cases of any disagreement and  
34  
35 295 ensure that no errors occur during the study. The manuscript describing this protocol  
36  
37 296 was drafted by DJL and revised by TX. All authors have approved the publication of  
38  
39 297 this protocol.

### 40 298 **Competing interests**

41  
42 299 None declared.

### 43 300 **Patient consent**

44  
45 301 Not required.

46  
47 302  
48  
49  
50  
51  
52  
53  
54  
55  
56  
57  
58  
59  
60

304 **REFERENCES**

- 305 1. von Lindern JS, van den Bruele T, Lopriore E, et al. Thrombocytopenia in neonates and the  
306 risk of intraventricular hemorrhage: a retrospective cohort study. *BMC Pediatr*  
307 2011;11:16.
- 308 2. Roberts I, Stanworth S and Murray NA. Thrombocytopenia in the neonate. *Blood Rev*  
309 2008;22(4):173-86.
- 310 3. Resch E, Hinkas O, Urlesberger B, et al. Neonatal thrombocytopenia-causes and outcomes  
311 following platelet transfusions. *Eur J Pediatr* 2018;177(7):1045-1052.
- 312 4. Ree IMC, Fustolo-Gunnink SF, Bekker V, et al. Thrombocytopenia in neonatal sepsis:  
313 Incidence, severity and risk factors. *PLoS One* 2017;12(10):e0185581.
- 314 5. Dahmane Ayadi I, Ben Hamida E, Youssef A, et al. Prevalence and outcomes of  
315 thrombocytopenia in a neonatal intensive care unit. *Tunis Med* 2016;94(4):305-308.
- 316 6. Winkelhorst D and Oepkes D. Foetal and neonatal alloimmune thrombocytopenia. *Best*  
317 *Pract Res Clin Obstet Gynaecol* 2019;58:15-27.
- 318 7. Kamphuis MM, Paridaans NP, Porcelijn L, et al. Incidence and consequences of neonatal  
319 alloimmune thrombocytopenia: a systematic review. *Pediatrics* 2014;133(4):715-21.
- 320 8. Guida JD, Kunig AM, Leef KH, et al. Platelet count and sepsis in very low birth weight  
321 neonates: is there an organism-specific response? *Pediatrics* 2003;111(6 Pt 1):1411-5.
- 322 9. Bolat F, Kılıç SÇ, Oflaz MB, et al. The prevalence and outcomes of thrombocytopenia in a  
323 neonatal intensive care unit: a three-year report. *Pediatric hematology and oncology*  
324 2012;29(8):710-720.
- 325 10. Castle V, Andrew M, Kelton J, et al. Frequency and mechanism of neonatal  
326 thrombocytopenia. *The Journal of pediatrics* 1986;108(5 Pt 1):749-755.
- 327 11. Mehta P, Vasa R, Neumann L, et al. Thrombocytopenia in the high-risk infant. *The*  
328 *Journal of pediatrics* 1980;97(5):791-794.
- 329 12. Ulusoy E, Tufekci O, Duman N, et al. Thrombocytopenia in neonates: causes and



1  
2  
3  
4  
5  
6  
7  
8  
9  
10  
11  
12  
13  
14  
15  
16  
17  
18  
19  
20  
21  
22  
23  
24  
25  
26  
27  
28  
29  
30  
31  
32  
33  
34  
35  
36  
37  
38  
39  
40  
41  
42  
43  
44  
45  
46  
47  
48  
49  
50  
51  
52  
53  
54  
55  
56  
57  
58  
59  
60

- 330 outcomes. *Ann Hematol* 2013;92(7):961-7.
- 331 13. Andrew M, Vegh P, Caco C, et al. A randomized, controlled trial of platelet transfusions  
332 in thrombocytopenic premature infants. *J Pediatr* 1993;123(2):285-91.
- 333 14. Curley A, Stanworth SJ, Willoughby K, et al. Randomized Trial of Platelet-Transfusion  
334 Thresholds in Neonates. *N Engl J Med* 2019;380(3):242-251.
- 335 15. Borges JP, dos Santos AM, da Cunha DH, et al. Restrictive guideline reduces platelet  
336 count thresholds for transfusions in very low birth weight preterm infants. *Vox Sang*  
337 2013;104(3):207-13.
- 338 16. Girelli G, Antoncicchi S, Casadei AM, et al. Recommendations for transfusion therapy in  
339 neonatology. *Blood Transfus* 2015;13(3):484-97.
- 340 17. New HV, Berryman J, Bolton-Maggs PH, et al. Guidelines on transfusion for fetuses,  
341 neonates and older children. *Br J Haematol* 2016;175(5):784-828.
- 342 18. Lopriore E. Updates in Red Blood Cell and Platelet Transfusions in Preterm Neonates.  
343 *Am J Perinatol* 2019;36(S 02):S37-S40.
- 344 19. Del Vecchio A, Franco C, Petrillo F, et al. Neonatal Transfusion Practice: When do  
345 Neonates Need Red Blood Cells or Platelets? *Am J Perinatol* 2016;33(11):1079-84.
- 346 20. Carr R, Kelly AM and Williamson LM. Neonatal thrombocytopenia and platelet  
347 transfusion - a UK perspective. *Neonatology* 2015;107(1):1-7.
- 348 21. Calhoun DA, Christensen RD, Edstrom CS, et al. Consistent approaches to procedures  
349 and practices in neonatal hematology. *Clin Perinatol* 2000;27(3):733-53.
- 350 22. Sparger K, Deschmann E and Sola-Visner M. Platelet Transfusions in the Neonatal  
351 Intensive Care Unit. *Clin Perinatol* 2015;42(3):613-23.
- 352 23. Christensen RD, Carroll PD and Josephson CD. Evidence-based advances in transfusion  
353 practice in neonatal intensive care units. *Neonatology* 2014;106(3):245-53.
- 354 24. Baer VL, Lambert DK, Schmutz N, et al. Adherence to NICU transfusion guidelines: data

- 1  
2  
3  
4 355 from a multihospital healthcare system. *J Perinatol* 2008;28(7):492-7.  
5  
6 356 25. Christensen RD, Paul DA, Sola-Visner MC, et al. Improving platelet transfusion practices  
7  
8 357 in the neonatal intensive care unit. *Transfusion* 2008;48(11):2281-4.  
9  
10 358 26. Gibson BE, Todd A, Roberts I, et al. Transfusion guidelines for neonates and older  
11  
12 359 children. *Br J Haematol* 2004;124(4):433-53.  
13  
14 360 27. Cremer M, Sallmon H, Kling PJ, et al. Thrombocytopenia and platelet transfusion in the  
15  
16 361 neonate. *Semin Fetal Neonatal Med* 2016;21(1):10-8.  
17  
18 362 28. Fustolo-Gunnink SF, Huisman EJ, van der Bom JG, et al. Are thrombocytopenia and  
19  
20 363 platelet transfusions associated with major bleeding in preterm neonates? A systematic  
21  
22 364 review. *Blood Rev* 2019;36:1-9.  
23  
24 365 29. Kumar J, Dutta S, Sundaram V, et al. Platelet Transfusion for PDA Closure in Preterm  
25  
26 366 Infants: A Randomized Controlled Trial. *Pediatrics* 2019;143(5)  
27  
28 367 30. Haass KA, Sapiano MRP, Savinkina A, et al. Transfusion-Transmitted Infections  
29  
30 368 Reported to the National Healthcare Safety Network Hemovigilance Module. *Transfus*  
31  
32 369 *Med Rev* 2019;33(2):84-91.  
33  
34 370 31. Stolla M, Refaai MA, Heal JM, et al. Platelet transfusion - the new immunology of an old  
35  
36 371 therapy. *Front Immunol* 2015;6:28.  
37  
38 372 32. Stainsby D, Jones H, Asher D, et al. Serious hazards of transfusion: a decade of  
39  
40 373 hemovigilance in the UK. *Transfus Med Rev* 2006;20(4):273-82.  
41  
42 374 33. Shamseer L, Moher D, Clarke M, et al. Preferred reporting items for systematic review  
43  
44 375 and meta-analysis protocols (PRISMA-P) 2015: elaboration and explanation. *BMJ*  
45  
46 376 2015;350:g7647.  
47  
48 377 34. Higgins JPT, Thomas J, Chandler J, et al. Cochrane Handbook for Systematic Reviews of  
49  
50 378 Interventions . [Type]: Chichester (UK): John Wiley & Sons, 2019.  
51  
52 379 35. Moher D, Liberati A, Tetzlaff J, et al. Preferred reporting items for systematic reviews  
53  
54 380 and meta-analyses: the PRISMA statement. *Int J Surg* 2010;8(5):336-41.  
55  
56  
57  
58  
59  
60

1  
2  
3  
4  
5  
6  
7  
8  
9  
10  
11  
12  
13  
14  
15  
16  
17  
18  
19  
20  
21  
22  
23  
24  
25  
26  
27  
28  
29  
30  
31  
32  
33  
34  
35  
36  
37  
38  
39  
40  
41  
42  
43  
44  
45  
46  
47  
48  
49  
50  
51  
52  
53  
54  
55  
56  
57  
58  
59  
60

- 381 36. Guyatt G, Oxman AD, Akl EA, et al. GRADE guidelines: 1. Introduction-GRADE  
382 evidence profiles and summary of findings tables. *J Clin Epidemiol* 2011;64(4):383-94.
- 383 37. Roberts JC, Javed MJ, Hocker JR, et al. Risk factors associated with intraventricular  
384 hemorrhage in extremely premature neonates. *Blood Coagul Fibrinolysis*  
385 2018;29(1):25-29.
- 386 38. Sancak S, Toptan HH, Gokmen Yildirim T, et al. THROMBOCYTOPENIA AS A RISK  
387 FACTOR FOR RETINOPATHY OF PREMATURITY. *Retina* 2019;39(4):706-711.
- 388 39. Jensen AK, Ying GS, Huang J, et al. Longitudinal study of the association between  
389 thrombocytopenia and retinopathy of prematurity. *J aapos* 2018;22(2):119-123.
- 390 40. Higgins JPT, Altman DG, Gøtzsche PC, et al. The Cochrane Collaboration's tool for  
391 assessing risk of bias in randomised trials. 2011;343:d5928.

**Supplemental Figure 1. Flow Diagram of Studies Selected for Inclusion in the Systematic Review (PRISMA 2009 Flow Diagram)**

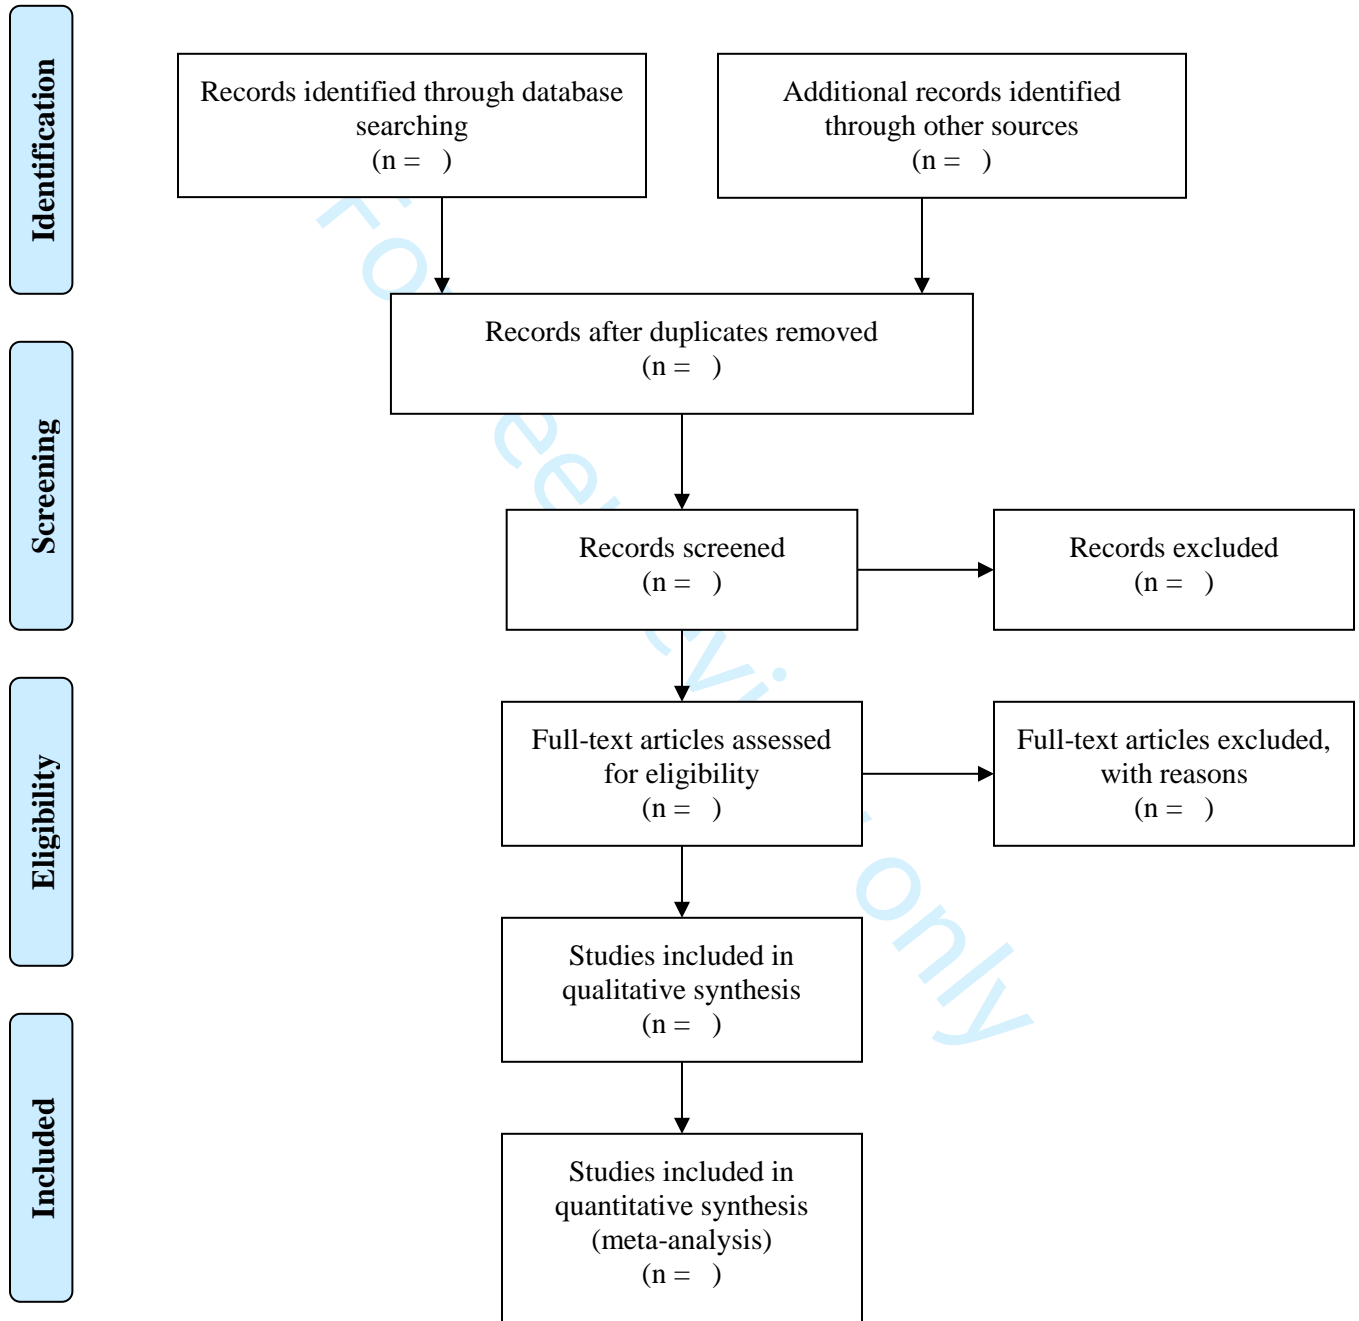

**Supplemental Table 1. Search strategy used for the following databases:  
PubMed, the Cochrane Central Register of Controlled Trials and Embase**

**Table 1.1 PubMed**

| Query |                                        |
|-------|----------------------------------------|
| #1    | “Platelet Transfusion” [MeSH]          |
| #2    | platelet transfus*                     |
| #3    | platelet infus*                        |
| #4    | platelet administrat*                  |
| #5    | PT                                     |
| #6    | thrombocyte transfus*                  |
| #7    | thrombocyte infus*                     |
| #8    | thrombocyte administrat*               |
| #9    | “Thrombocytopenia” [MeSH]              |
| #10   | thrombocytopen*                        |
| #11   | NT                                     |
| #12   | “Infant, Newborn” [MeSH]               |
| #13   | infant                                 |
| #14   | newborn                                |
| #15   | neonat*                                |
| #16   | preterm                                |
| #17   | prematur*                              |
| #18   | #1 or #3 or #4 or #5 or #6 or #7 or #8 |
| #19   | #9 or #10 or #11                       |
| #20   | #12 or #13 or #14 or #15 or #16 or #17 |
| #21   | 18 and #19 and #20 Filters: Humans     |

**Table 1.2 The Cochrane Central Register of Controlled Trials**

| Query |                                                                          |
|-------|--------------------------------------------------------------------------|
| #1    | MeSH descriptor: [Platelet Transfusion] explode all trees                |
| #2    | (platelet transfus*): ti, ab, kw (word variations have been searched)    |
| #3    | (platelet infus*): ti, ab, kw (word variations have been searched)       |
| #4    | (platelet administrat*): ti, ab, kw (word variations have been searched) |
| #5    | (PT): ti, ab, kw (word variations have been searched)                    |
| #6    | (thrombocyte transfus*): ti, ab, kw                                      |
| #7    | (thrombocyte infus*): ti, ab, kw                                         |
| #8    | (thrombocyte administrat*): ti, ab, kw                                   |
| #9    | MeSH descriptor: [Thrombocytopenia] explode all trees                    |
| #10   | (thrombocytopeni*): ti, ab, kw (word variations have been searched)      |
| #11   | (NT): ti, ab, kw (word variations have been searched)                    |
| #12   | MeSH descriptor: [Infant, Newborn] explode all trees                     |
| #13   | (infant): ti, ab, kw                                                     |
| #14   | (newborn): ti, ab, kw                                                    |
| #15   | (neonat*): ti, ab, kw                                                    |
| #16   | (preterm): ti, ab, kw                                                    |
| #17   | (premat*): ti, ab, kw                                                    |
| #18   | #1 or #3 or #4 or #5 or #6 or #7 or #8                                   |
| #19   | #9 or #10 or #11                                                         |
| #20   | #1 or #3 or #4 or #5 or #6 or #7 or #8 or #9 or #10                      |
| #21   | 18 and #19 and #20 in Trials                                             |

**Table 1.3 Embase**

| Query |                                                                                                                                                                                                                                                                                                                                                                                                                                                                                                                                                                                                                  |
|-------|------------------------------------------------------------------------------------------------------------------------------------------------------------------------------------------------------------------------------------------------------------------------------------------------------------------------------------------------------------------------------------------------------------------------------------------------------------------------------------------------------------------------------------------------------------------------------------------------------------------|
| #1    | 'thrombocyte transfusion'/exp                                                                                                                                                                                                                                                                                                                                                                                                                                                                                                                                                                                    |
| #2    | thrombocyte transfus*                                                                                                                                                                                                                                                                                                                                                                                                                                                                                                                                                                                            |
| #3    | thrombocyte infus*                                                                                                                                                                                                                                                                                                                                                                                                                                                                                                                                                                                               |
| #4    | thrombocyte administrat*                                                                                                                                                                                                                                                                                                                                                                                                                                                                                                                                                                                         |
| #5    | 'platelet transfusion'/exp OR 'platelet transfusion'                                                                                                                                                                                                                                                                                                                                                                                                                                                                                                                                                             |
| #6    | platelet transfus*                                                                                                                                                                                                                                                                                                                                                                                                                                                                                                                                                                                               |
| #7    | platelet infus*                                                                                                                                                                                                                                                                                                                                                                                                                                                                                                                                                                                                  |
| #8    | platelet administrat*                                                                                                                                                                                                                                                                                                                                                                                                                                                                                                                                                                                            |
| #9    | pt                                                                                                                                                                                                                                                                                                                                                                                                                                                                                                                                                                                                               |
| #10   | 'thrombocytopenia'/exp                                                                                                                                                                                                                                                                                                                                                                                                                                                                                                                                                                                           |
| #11   | thrombocytopen*                                                                                                                                                                                                                                                                                                                                                                                                                                                                                                                                                                                                  |
| #12   | nt                                                                                                                                                                                                                                                                                                                                                                                                                                                                                                                                                                                                               |
| #13   | 'newborn'/exp                                                                                                                                                                                                                                                                                                                                                                                                                                                                                                                                                                                                    |
| #14   | infant                                                                                                                                                                                                                                                                                                                                                                                                                                                                                                                                                                                                           |
| #15   | newborn                                                                                                                                                                                                                                                                                                                                                                                                                                                                                                                                                                                                          |
| #16   | neonat*                                                                                                                                                                                                                                                                                                                                                                                                                                                                                                                                                                                                          |
| #17   | preterm                                                                                                                                                                                                                                                                                                                                                                                                                                                                                                                                                                                                          |
| #18   | prematur*                                                                                                                                                                                                                                                                                                                                                                                                                                                                                                                                                                                                        |
| #19   | #1 or #3 or #4 or #5 or #6 or #7 or #8 or #9                                                                                                                                                                                                                                                                                                                                                                                                                                                                                                                                                                     |
| #20   | #10 or #11 or #12                                                                                                                                                                                                                                                                                                                                                                                                                                                                                                                                                                                                |
| #21   | #13 or #14 or #15 or #16 or #17 or #18                                                                                                                                                                                                                                                                                                                                                                                                                                                                                                                                                                           |
| #22   | #19 AND #20 AND #21 AND ('clinical article'/de OR 'clinical study'/de OR 'clinical trial'/de OR 'clinical trial topic'/de OR 'cohort analysis'/de OR 'controlled clinical trial'/de OR 'controlled study'/de OR 'feasibility study'/de OR 'human'/de OR 'human experiment'/de OR 'intermethod comparison'/de OR 'major clinical study'/de OR 'multicenter study'/de OR 'observational study'/de OR 'open study'/de OR 'outcomes research'/de OR 'phase 2 clinical trial'/de OR 'prospective study'/de OR 'randomized controlled trial'/de OR 'randomized controlled trial topic'/de OR 'retrospective study'/de) |

Supplemental Table 2. Definitions of outcome measures

| Outcome measures      | Definitions                                                                                                                                                                                                                                                                                                                                                                                                                                                                                                                                                                                                                                | Minimum follow-up |
|-----------------------|--------------------------------------------------------------------------------------------------------------------------------------------------------------------------------------------------------------------------------------------------------------------------------------------------------------------------------------------------------------------------------------------------------------------------------------------------------------------------------------------------------------------------------------------------------------------------------------------------------------------------------------------|-------------------|
| IVH                   | <p>The presence of blood inside the ventricles on CT or cranial ultrasonography</p> <p>Grading of IVH (as described by J. Volpe):</p> <p><b>Grade I:</b> bleeding confined to the periventricular area (germinal matrix)</p> <p><b>Grade II:</b> intraventricular bleeding (10-50% of the ventricular area on a sagittal view)</p> <p><b>Grade III:</b> intraventricular bleeding (&gt;50% of the ventricular area or distends the ventricle)</p> <p><b>Grade IV:</b> intra-parenchymal echodensity (IPE) represents periventricular haemorrhagic infarction and is often referred to as Grade IV IVH</p>                                  | 3 d               |
| ICH                   | The presence of blood within the skull on CT or cranial ultrasonography                                                                                                                                                                                                                                                                                                                                                                                                                                                                                                                                                                    | 3 d               |
| PH                    | The presence of frank tracheal blood and multi-lobular opacity on chest X-ray                                                                                                                                                                                                                                                                                                                                                                                                                                                                                                                                                              | 3 d               |
| Frank rectal bleeding | Macroscopic faecal bleed                                                                                                                                                                                                                                                                                                                                                                                                                                                                                                                                                                                                                   | 3 d               |
| PDA                   | <p>PDA: open ductus arteriosus on echocardiography or associated Doppler studies after 15 postnatal hours</p> <p><b>Clinically significant PDA was suspected</b> in the presence of 2 or more of the following:</p> <ol style="list-style-type: none"> <li>(1) heart murmur,</li> <li>(2) hyperdynamic precordium,</li> <li>(3) bounding pulses,</li> <li>(4) persistent tachycardia (&gt;160 beats per minute),</li> <li>(5) wide pulse pressure,</li> <li>(6) new-onset or increase in ventilator requirements,</li> <li>(7) systemic hypoperfusion (poor pulses, prolonged capillary refill time, decreased urine output, or</li> </ol> | 3 d               |



|     |                                                                                                                                                                                                                                                                                                                                                                                                                                                                                                                                                                                                                                                                                                                                                                                                                                                                                                                                                                                                                                                                                                                                          |      |
|-----|------------------------------------------------------------------------------------------------------------------------------------------------------------------------------------------------------------------------------------------------------------------------------------------------------------------------------------------------------------------------------------------------------------------------------------------------------------------------------------------------------------------------------------------------------------------------------------------------------------------------------------------------------------------------------------------------------------------------------------------------------------------------------------------------------------------------------------------------------------------------------------------------------------------------------------------------------------------------------------------------------------------------------------------------------------------------------------------------------------------------------------------|------|
|     | <p>hypotension),</p> <p>(8) chest radiographic evidence, i.e., pulmonary congestion or cardiomegaly (a cardiothoracic ratio &gt;60%) with increased pulmonary flow.</p> <p><b>Echocardiographic hs-PDA</b> was defined as the presence of transductal diameter <math>\geq 1.5</math> mm at the pulmonary end plus 1 of the following:</p> <ol style="list-style-type: none"> <li>(1) left-atrium/aorta ratio <math>\geq 1.4</math>,</li> <li>(2) ductal velocity &lt;2 metres per second,</li> <li>(3) antegrade left pulmonary artery diastolic flow &gt;30 centimetres per second,</li> <li>(4) E-wave/A-wave ratio &gt;1,</li> <li>(5) isovolaemic relaxation time <math>\leq 45</math> milliseconds,</li> <li>(6) absent or reversed diastolic blood flow pattern in the descending thoracic aorta.</li> </ol>                                                                                                                                                                                                                                                                                                                       |      |
| BPD | <p>Treated with more than 21% oxygen for at least 28 days;</p> <p>Diagnostic criteria for bronchopulmonary dysplasia (as described by National Institutes of Health):</p> <p><b>Mild BPD:</b></p> <ol style="list-style-type: none"> <li>(1) breathing room air at 36 weeks post-menstrual age or discharge (for those with GA &lt;32 weeks)</li> <li>(2) breathing room air by 56 days postnatal age or discharge (for those with GA <math>\geq 32</math> weeks)</li> </ol> <p><b>Moderate BPD:</b></p> <ol style="list-style-type: none"> <li>(1) need for &lt;30% O<sub>2</sub> at 36 weeks post-menstrual age, or discharge (for those with GA &lt;32 weeks)</li> <li>(2) need for &lt;30% O<sub>2</sub> to 56 days postnatal age, or discharge (for those with GA <math>\geq 32</math> weeks)</li> </ol> <p><b>Severe BPD:</b></p> <ol style="list-style-type: none"> <li>(1) need for &gt;30% O<sub>2</sub>, with or without positive pressure ventilation or continuous positive pressure at 36 weeks post-menstrual age, or discharge (for those with GA &lt;32 weeks) (for those with GA <math>\geq 32</math> weeks)</li> </ol> | 28 d |

|        |                                                                                                                                                                                                                                                                                                                                                                                                                                                                                                                                                                                                                                                                                                                                                                                                                                                                                                                                                                                                                                                                                                                                                                                                                                                                                                               |     |
|--------|---------------------------------------------------------------------------------------------------------------------------------------------------------------------------------------------------------------------------------------------------------------------------------------------------------------------------------------------------------------------------------------------------------------------------------------------------------------------------------------------------------------------------------------------------------------------------------------------------------------------------------------------------------------------------------------------------------------------------------------------------------------------------------------------------------------------------------------------------------------------------------------------------------------------------------------------------------------------------------------------------------------------------------------------------------------------------------------------------------------------------------------------------------------------------------------------------------------------------------------------------------------------------------------------------------------|-----|
|        | (2) need for >30% O <sub>2</sub> with or without positive pressure ventilation or continuous positive pressure at 56 days postnatal age, or discharge (for those with GA ≥32 weeks)                                                                                                                                                                                                                                                                                                                                                                                                                                                                                                                                                                                                                                                                                                                                                                                                                                                                                                                                                                                                                                                                                                                           |     |
| Sepsis | A bacterial bloodstream infection (blood culture-proven infection)                                                                                                                                                                                                                                                                                                                                                                                                                                                                                                                                                                                                                                                                                                                                                                                                                                                                                                                                                                                                                                                                                                                                                                                                                                            | 7 d |
| NEC    | <p>At least one clinical finding (bilious gastric aspirate or emesis, abdominal distension, or occult or gross blood in the stool in the absence of anal fissures) and at least one radiographic finding (pneumatosis intestinalis, hepatobiliary gas, or pneumoperitoneum) are required to secure the diagnosis.</p> <p>Bell's stages of necrotizing enterocolitis:</p> <p><b>I. Suspected disease</b></p> <p>(1) Mild systemic signs (apnoea, bradycardia, temperature instability)</p> <p>(2) Mild intestinal signs (abdominal distention, gastric residuals, bloody stools)</p> <p>(3) Non-specific or normal radiological signs</p> <p><b>II. Definite disease</b></p> <p>(1) Mild to moderate systemic signs</p> <p>(2) Additional intestinal signs (absent bowel sounds, abdominal tenderness)</p> <p>(3) Specific radiologic signs (pneumatosis intestinalis or portal venous air)</p> <p>(4) Laboratory changes (metabolic acidosis, thrombocytopenia)</p> <p><b>III. Advanced disease</b></p> <p>(1) Severe systemic illness (hypotension)</p> <p>(2) Additional intestinal signs (striking abdominal distention, peritonitis)</p> <p>(3) Severe radiological signs (pneumoperitoneum)</p> <p>(4) Additional laboratory changes (metabolic and respiratory acidosis, disseminated intravascular</p> | 7 d |

|     |                                                                                                                                                            |      |
|-----|------------------------------------------------------------------------------------------------------------------------------------------------------------|------|
|     | coagulopathy)                                                                                                                                              |      |
| ROP | Diagnosed by the ophthalmologist according to the International Classification of Retinopathy of Prematurity, first published in 1985 and revised in 2005. | 28 d |

IVH: intraventricular haemorrhage; CT: computed tomography; ICH: intracranial haemorrhage; PH: pulmonary haemorrhage; PDA: patent ductus arteriosus; hs-PDA: haemodynamically significant patent ductus arteriosus; BPD: bronchopulmonary dysplasia; GA: gestational age; NEC: necrotizing enterocolitis; ROP: retinopathy of prematurity

Supplemental Table 3.1 Data extraction sheet for RCTs

| Publication and study details                                       |                                                                    |                             |                       |                                                               |                           |                  |
|---------------------------------------------------------------------|--------------------------------------------------------------------|-----------------------------|-----------------------|---------------------------------------------------------------|---------------------------|------------------|
| Authors                                                             |                                                                    |                             |                       |                                                               |                           |                  |
| Year of publication                                                 |                                                                    |                             |                       |                                                               |                           |                  |
| Country                                                             |                                                                    |                             |                       |                                                               |                           |                  |
| Study design                                                        |                                                                    |                             |                       |                                                               |                           |                  |
| Number of participants                                              |                                                                    |                             |                       |                                                               |                           |                  |
| Groups                                                              | Experimental<br>platelet count threshold<br>(*10 <sup>3</sup> /μL) |                             |                       | Control<br>platelet count threshold<br>(*10 <sup>3</sup> /μL) |                           |                  |
|                                                                     |                                                                    |                             |                       |                                                               |                           |                  |
| Clinical characteristics                                            |                                                                    |                             |                       |                                                               |                           |                  |
|                                                                     | Experimental<br>median (or<br>mean)                                | Experimental<br>IQR (or SD) | Experimental<br>total | Control<br>median (or<br>mean)                                | Control<br>IQR (or<br>SD) | Control<br>total |
| GA (w)                                                              |                                                                    |                             |                       |                                                               |                           |                  |
| BW (g)                                                              |                                                                    |                             |                       |                                                               |                           |                  |
| Platelet<br>count (*10 <sup>-3</sup><br>per<br>cubic<br>millimeter) |                                                                    |                             |                       |                                                               |                           |                  |
| Number of<br>platelet<br>transfusions                               |                                                                    |                             |                       |                                                               |                           |                  |
| Primary outcomes                                                    |                                                                    |                             |                       |                                                               |                           |                  |
|                                                                     | Experimental<br>event                                              | Experimental<br>total       | Control<br>event      | Control<br>total                                              |                           |                  |
| In-hospital mortality<br>or major bleeding<br>events                |                                                                    |                             |                       |                                                               |                           |                  |
| Bleeding episodes                                                   |                                                                    |                             |                       |                                                               |                           |                  |
| IVH                                                                 |                                                                    |                             |                       |                                                               |                           |                  |
| ICH                                                                 |                                                                    |                             |                       |                                                               |                           |                  |
| PH                                                                  |                                                                    |                             |                       |                                                               |                           |                  |
| Frank rectal bleeding                                               |                                                                    |                             |                       |                                                               |                           |                  |
| Other bleeding                                                      |                                                                    |                             |                       |                                                               |                           |                  |
| Secondary outcomes                                                  |                                                                    |                             |                       |                                                               |                           |                  |
| Major morbidity                                                     |                                                                    |                             |                       |                                                               |                           |                  |
|                                                                     | Experimental                                                       | Experimental                | Control event         | Control total                                                 |                           |                  |

|                                     |                               |                          |                    |                          |                     |               |
|-------------------------------------|-------------------------------|--------------------------|--------------------|--------------------------|---------------------|---------------|
|                                     | event                         | total                    |                    |                          |                     |               |
| PDA                                 |                               |                          |                    |                          |                     |               |
| BPD                                 |                               |                          |                    |                          |                     |               |
| Sepsis                              |                               |                          |                    |                          |                     |               |
| NEC                                 |                               |                          |                    |                          |                     |               |
| ROP                                 |                               |                          |                    |                          |                     |               |
| <b>Other outcome measures</b>       |                               |                          |                    |                          |                     |               |
| LOS (days)                          | Experimental median (or mean) | Experimental IQR (or SD) | Experimental total | Control median (or mean) | Control IQR (or SD) | Control total |
|                                     |                               |                          |                    |                          |                     |               |
| Adverse effects of transfusion      | Experimental event            | Experimental total       | Control event      |                          | Control total       |               |
|                                     |                               |                          |                    |                          |                     |               |
| <b>Other information</b>            |                               |                          |                    |                          |                     |               |
| Type and dose of platelet component |                               |                          |                    |                          |                     |               |
| Any sponsorship or funding          |                               |                          |                    |                          |                     |               |

IQR: interquartile range; SD: standard deviation; GA: gestational age; BW: birth weight; IVH: intraventricular haemorrhage; ICH: intracranial haemorrhage; PH: pulmonary haemorrhage; BPD: bronchopulmonary dysplasia; NEC: necrotizing enterocolitis; PDA: patent ductus arteriosus; NEC: necrotizing enterocolitis; ROP: retinopathy of prematurity; LOS: length of stay

**Supplemental Table 3.2 Data extraction sheet for cohort studies**

| Publication and study details                          |                                                         |                                                         |               |                          |                                                         |               |                          |                     |               |
|--------------------------------------------------------|---------------------------------------------------------|---------------------------------------------------------|---------------|--------------------------|---------------------------------------------------------|---------------|--------------------------|---------------------|---------------|
| Authors                                                |                                                         |                                                         |               |                          |                                                         |               |                          |                     |               |
| Year of publication                                    |                                                         |                                                         |               |                          |                                                         |               |                          |                     |               |
| Country                                                |                                                         |                                                         |               |                          |                                                         |               |                          |                     |               |
| Study design                                           |                                                         |                                                         |               |                          |                                                         |               |                          |                     |               |
| Number of participants                                 |                                                         |                                                         |               |                          |                                                         |               |                          |                     |               |
| Groups                                                 | Group 1 platelet count threshold (*10 <sup>3</sup> /μL) | Group 2 platelet count threshold (*10 <sup>3</sup> /μL) |               |                          | Group N platelet count threshold (*10 <sup>3</sup> /μL) |               |                          |                     |               |
|                                                        |                                                         |                                                         |               |                          |                                                         |               |                          |                     |               |
| Clinical characteristics                               |                                                         |                                                         |               |                          |                                                         |               |                          |                     |               |
|                                                        | Group 1 median (or mean)                                | Group 1 IQR (or SD)                                     | Group 1 total | Group 2 median (or mean) | Group 2 IQR (or SD)                                     | Group 2 total | Group N median (or mean) | Group N IQR (or SD) | Group N total |
| GA (w)                                                 |                                                         |                                                         |               |                          |                                                         |               |                          |                     |               |
| BW (g)                                                 |                                                         |                                                         |               |                          |                                                         |               |                          |                     |               |
| Platelet count (*10 <sup>3</sup> per cubic millimetre) |                                                         |                                                         |               |                          |                                                         |               |                          |                     |               |
| Number of platelet transfusions                        |                                                         |                                                         |               |                          |                                                         |               |                          |                     |               |
| Primary outcomes                                       |                                                         |                                                         |               |                          |                                                         |               |                          |                     |               |
|                                                        | Group 1 event                                           | Group 1 total                                           | Group 2 event | Group 2 total            | Group N event                                           | Group N total |                          |                     |               |
| In-hospital mortality or major bleeding events         |                                                         |                                                         |               |                          |                                                         |               |                          |                     |               |
| Bleeding episodes                                      |                                                         |                                                         |               |                          |                                                         |               |                          |                     |               |
| IVH                                                    |                                                         |                                                         |               |                          |                                                         |               |                          |                     |               |
| ICH                                                    |                                                         |                                                         |               |                          |                                                         |               |                          |                     |               |
| PH                                                     |                                                         |                                                         |               |                          |                                                         |               |                          |                     |               |
| Frank rectal bleeding                                  |                                                         |                                                         |               |                          |                                                         |               |                          |                     |               |
| Other bleeding                                         |                                                         |                                                         |               |                          |                                                         |               |                          |                     |               |
| Secondary outcomes                                     |                                                         |                                                         |               |                          |                                                         |               |                          |                     |               |

| Major morbidity                     |                          |                     |               |                          |                     |               |                          |                     |               |
|-------------------------------------|--------------------------|---------------------|---------------|--------------------------|---------------------|---------------|--------------------------|---------------------|---------------|
|                                     | Group 1 event            | Group 1 total       | Group 2 event | Group 2 total            | Group N event       | Group N total |                          |                     |               |
| PDA                                 |                          |                     |               |                          |                     |               |                          |                     |               |
| BPD                                 |                          |                     |               |                          |                     |               |                          |                     |               |
| Sepsis                              |                          |                     |               |                          |                     |               |                          |                     |               |
| NEC                                 |                          |                     |               |                          |                     |               |                          |                     |               |
| ROP                                 |                          |                     |               |                          |                     |               |                          |                     |               |
| Other outcome measures              |                          |                     |               |                          |                     |               |                          |                     |               |
| LOS (days)                          | Group 1 median (or mean) | Group 1 IQR (or SD) | Group 1 total | Group 2 median (or mean) | Group 2 IQR (or SD) | Group 2 total | Group N median (or mean) | Group N IQR (or SD) | Group N total |
|                                     |                          |                     |               |                          |                     |               |                          |                     |               |
| Adverse effects of transfusion      | Group 1 event            | Group 1 total       | Group 2 event | Group 2 total            | Group N event       | Group N total |                          |                     |               |
|                                     |                          |                     |               |                          |                     |               |                          |                     |               |
| Other information                   |                          |                     |               |                          |                     |               |                          |                     |               |
| Type and dose of platelet component |                          |                     |               |                          |                     |               |                          |                     |               |
| Any sponsorship or funding          |                          |                     |               |                          |                     |               |                          |                     |               |

IQR: interquartile range; SD: standard deviation; GA: gestational age; BW: birth weight; IVH: intraventricular haemorrhage; ICH: intracranial haemorrhage; PH: pulmonary haemorrhage; BPD: bronchopulmonary dysplasia; NEC: necrotizing enterocolitis; PDA: patent ductus arteriosus; NEC: necrotizing enterocolitis; ROP: retinopathy of prematurity; LOS: length of stay

**Supplemental Table 3.3 Data extraction sheet for case-control studies**

| Publication and study details                                        |      |         |
|----------------------------------------------------------------------|------|---------|
| Authors                                                              |      |         |
| Year of publication                                                  |      |         |
| Country                                                              |      |         |
| Study design                                                         |      |         |
| Number of participants                                               |      |         |
| <b>Outcome measure<sup>a</sup></b>                                   |      |         |
| Clinical characteristics                                             |      |         |
|                                                                      | Case | Control |
| GA (w)                                                               |      |         |
| BW (g)                                                               |      |         |
| Platelet count (*10 <sup>3</sup> /μL)                                |      |         |
| Platelet transfusion                                                 |      |         |
| Platelet transfusion threshold 1 (*10 <sup>3</sup> /μL) <sup>b</sup> |      |         |
| Platelet transfusion threshold 2 (*10 <sup>3</sup> /μL) <sup>b</sup> |      |         |
| Number of platelet transfusions                                      |      |         |
| Other information                                                    |      |         |
| Type and dose of platelet component                                  |      |         |
| Any sponsorship or funding                                           |      |         |

a The outcome measure to distinguish the case and the control groups include: in-hospital mortality or bleeding episodes [including intraventricular haemorrhage (IVH), intracranial haemorrhage (ICH), pulmonary haemorrhage (PH), frank rectal bleeding, and other bleeding], morbidity [including patent ductus arteriosus (PDA), sepsis, necrotizing enterocolitis (NEC), bronchopulmonary dysplasia (BPD), retinopathy of prematurity (ROP), etc.] and adverse effects of transfusion.

b If the different platelet transfusion thresholds cannot be obtained, we will record only “platelet transfusion” or “without platelet transfusion”.



**Supplemental Table 4. The risk of bias assessment tool for randomized controlled studies**

**Supplemental Table 4.1 The risk of bias table**

| <b>Item</b>                                                      | <b>Judgement</b> | <b>Support for judgement</b> |
|------------------------------------------------------------------|------------------|------------------------------|
| <b>Random sequence generation (selection bias)</b>               |                  |                              |
| <b>Allocation concealment (selection bias)</b>                   |                  |                              |
| <b>Blinding of participants and personnel (performance bias)</b> |                  |                              |
| <b>Blinding of outcome assessment (detection bias)</b>           |                  |                              |
| <b>Incomplete outcome data addressed (attrition bias)</b>        |                  |                              |
| <b>Selective reporting (reporting bias)</b>                      |                  |                              |
| <b>Other bias</b>                                                |                  |                              |

**Supplemental Table 4.2 The recommended list of items in the risk of bias tool**

| <b>Bias domain</b> | <b>Source of bias</b>                   | <b>Support for judgment</b>                                                                                                                                                         | <b>Review authors' judgment (assess as low, unclear or high risk of bias)</b>                                      |
|--------------------|-----------------------------------------|-------------------------------------------------------------------------------------------------------------------------------------------------------------------------------------|--------------------------------------------------------------------------------------------------------------------|
| Selection bias     | Random sequence generation              | Describes the method used to generate the allocation sequence in sufficient detail to allow an assessment of whether it should produce comparable groups                            | Selection bias (biased allocation to interventions) due to the inadequate generation of a randomised sequence      |
|                    | Allocation concealment                  | Describes the method used to conceal the allocation sequence in sufficient detail to determine whether intervention allocations could have been foreseen before or during enrolment | Selection bias (biased allocation to interventions) due to inadequate concealment of allocations before assignment |
| Performance bias   | Blinding of participants and personnel* | Describes all measures used, if any, to blind trial participants and researchers from knowledge of which intervention a participant received. Provides any information related to   | Performance bias due to knowledge of the allocated interventions by participants and personnel during the study    |

|                |                                 |                                                                                                                                                                                                                                                                     |                                                                                      |
|----------------|---------------------------------|---------------------------------------------------------------------------------------------------------------------------------------------------------------------------------------------------------------------------------------------------------------------|--------------------------------------------------------------------------------------|
|                |                                 | whether the intended blinding was effective.                                                                                                                                                                                                                        |                                                                                      |
| Detection bias | Blinding of outcome assessment* | Describes all measures used, if any, to blind outcome assessments from knowledge of which intervention a participant received. Provides any information related to whether the intended blinding was effective.                                                     | Detection bias due to knowledge of the allocated interventions by outcome assessment |
| Attrition bias | Incomplete outcome data*        | Describes the completeness of outcome data for each main outcome, including attrition and exclusions from the analysis. States whether attrition and exclusions were reported, the numbers in each intervention group (compared with the total number of randomised | Attrition bias due to the amount, nature, or handling of incomplete outcome data     |

|                |                                     |                                                                                                                     |                                                   |
|----------------|-------------------------------------|---------------------------------------------------------------------------------------------------------------------|---------------------------------------------------|
|                |                                     | participants), reasons for attrition or exclusions where reported, and any reinclusions in analyses for the review. |                                                   |
| Reporting bias | Selective reporting                 | States how selective outcome reporting was examined and what was found.                                             | Reporting bias due to selective outcome reporting |
| Other bias     | Anything else, ideally prespecified | States any important concerns about bias not covered in the other domains of the tool.                              | Bias due to problems not covered elsewhere        |

\*Assessments of each main outcome or class of outcomes should be performed.

**Supplemental Table 4.3 Approach to formulating summary assessments of the risk of bias for each important outcome (across domains) within and across trials**

| <b>Risk of bias</b>  | <b>Interpretation</b>                                        | <b>Within a trial</b>                             | <b>Across trials</b>                                                                                                 |
|----------------------|--------------------------------------------------------------|---------------------------------------------------|----------------------------------------------------------------------------------------------------------------------|
| Low risk of bias     | Bias, if present, is unlikely to alter the results seriously | A low risk of bias for all key domains            | Most information is obtained from trials at low risk of bias                                                         |
| Unclear risk of bias | A risk of bias that raises some doubt about the results      | A low or unclear risk of bias for all key domains | Most information is obtained from trials at low or unclear risk of bias                                              |
| High risk of bias    | Bias may substantially alter the results                     | A high risk of bias for one or more key domains   | The proportion of information from trials at high risk of bias is sufficient to affect the interpretation of results |

**Supplemental Table 5. The Newcastle-Ottawa Scale (NOS) for cohort studies and case control studies**

**Supplemental Table 5.1 The Newcastle-Ottawa Scale (NOS) for cohort studies**

| Study | Item & score                                 |                                         |                               |                                                                                  |                                                                    |                           |                                                                |                                          |
|-------|----------------------------------------------|-----------------------------------------|-------------------------------|----------------------------------------------------------------------------------|--------------------------------------------------------------------|---------------------------|----------------------------------------------------------------|------------------------------------------|
|       | Selection                                    |                                         |                               |                                                                                  | Comparability                                                      | Outcome                   |                                                                |                                          |
|       | Representativeness of the exposed cohort (1) | Selection of the non-exposed cohort (1) | Ascertainment of exposure (1) | Demonstration that the outcome of interest was not present at start of study (1) | Compare the ability of cohorts based on the design or analysis (2) | Assessment of outcome (1) | Was the follow-up period long enough for outcomes to occur (1) | Adequacy of the follow-up of cohorts (1) |
|       |                                              |                                         |                               |                                                                                  |                                                                    |                           |                                                                |                                          |
|       |                                              |                                         |                               |                                                                                  |                                                                    |                           |                                                                |                                          |
|       |                                              |                                         |                               |                                                                                  |                                                                    |                           |                                                                |                                          |
|       |                                              |                                         |                               |                                                                                  |                                                                    |                           |                                                                |                                          |
|       |                                              |                                         |                               |                                                                                  |                                                                    |                           |                                                                |                                          |
|       |                                              |                                         |                               |                                                                                  |                                                                    |                           |                                                                |                                          |
|       |                                              |                                         |                               |                                                                                  |                                                                    |                           |                                                                |                                          |
|       |                                              |                                         |                               |                                                                                  |                                                                    |                           |                                                                |                                          |

## Supplemental 5.2 NEWCASTLE - OTTAWA QUALITY ASSESSMENT SCALE FOR COHORT STUDIES

Note: A study can be awarded a maximum of one star for each numbered item within the Selection and Outcome categories. A maximum of two stars are possible for Comparability.

### Selection

#### 1) Representativeness of the exposed cohort

- a) truly representative of the average \_\_\_\_\_ (describe) in the community \*
- b) somewhat representative of the average \_\_\_\_\_ (describe) in the community \*
- c) selected group of users, e.g., nurses and volunteers
- d) no description of the derivation of the cohort

#### 2) Selection of the non-exposed cohort

- a) drawn from the same community as the exposed cohort \*
- b) drawn from a different source
- c) no description of the derivation of the non-exposed cohort

#### 3) Ascertainment of exposure

- a) secure record (e.g., surgical records) \*
- b) structured interview \*
- c) written self-report
- d) no description

#### 4) Demonstration that the outcome of interest was not present at the start of the study

- a) yes \*
- b) no

### Comparability

#### 1) Comparability of cohorts based on the design or analysis

- a) study controls for \_\_\_\_\_ (select the most important factor) \*
- b) study controls for any additional factor \* (This criteria could be modified to indicate a specific control for a second important factor.)

### Outcome

#### 1) Assessment of outcome

- a) independent blinded assessment \*
- b) record linkage \*
- c) self-report
- d) no description

#### 2) Was the follow-up period long enough for outcomes to occur

- a) yes (selected an adequate follow-up period for the outcome of interest) \*
- b) no

#### 3) Adequacy of the follow-up of cohorts

- a) complete follow up - all subjects accounted for \*
- b) subjects lost to follow-up, unlikely to introduce bias - small number lost - > \_\_\_\_ % (select an adequate %) follow-up, or description provided of those individuals lost to follow-up) \*
- c) follow-up rate < \_\_\_\_ % (select an adequate %) and no description of those individuals lost to follow-up
- d) no statement

**Supplemental Table 5.3 The Newcastle-Ottawa Scale (NOS) for case control studies**

| Study | Item & score                         |                                     |                           |                            |                                                                         |                               |                                                         |                       |
|-------|--------------------------------------|-------------------------------------|---------------------------|----------------------------|-------------------------------------------------------------------------|-------------------------------|---------------------------------------------------------|-----------------------|
|       | Selection                            |                                     |                           |                            | Comparability                                                           | Exposure                      |                                                         |                       |
|       | Is the case definition adequate? (1) | Representativeness of the cases (1) | Selection of Controls (1) | Definition of Controls (1) | Comparability of cases and controls based on the design or analysis (2) | Ascertainment of exposure (1) | Same method of ascertainment for cases and controls (1) | Non-response rate (1) |
|       |                                      |                                     |                           |                            |                                                                         |                               |                                                         |                       |
|       |                                      |                                     |                           |                            |                                                                         |                               |                                                         |                       |
|       |                                      |                                     |                           |                            |                                                                         |                               |                                                         |                       |
|       |                                      |                                     |                           |                            |                                                                         |                               |                                                         |                       |
|       |                                      |                                     |                           |                            |                                                                         |                               |                                                         |                       |
|       |                                      |                                     |                           |                            |                                                                         |                               |                                                         |                       |
|       |                                      |                                     |                           |                            |                                                                         |                               |                                                         |                       |
|       |                                      |                                     |                           |                            |                                                                         |                               |                                                         |                       |



## Supplemental 5.4 NEWCASTLE - OTTAWA QUALITY ASSESSMENT SCALE FOR CASE CONTROL STUDIES

Note: A study can be awarded a maximum of one star for each numbered item within the Selection and Exposure categories. A maximum of two stars is possible for Comparability.

### Selection

- 1) Is the case definition adequate?
  - a) yes, with independent validation \*
  - b) yes, e.g., record linkage or based on self-reports
  - c) no description
- 2) Representativeness of the cases
  - a) consecutive or obviously representative series of cases \*
  - b) potential for selection bias or not stated
- 3) Selection of Controls
  - a) community controls \*
  - b) hospital controls
  - c) no description
- 4) Definition of Controls
  - a) no history of disease (endpoint)
  - b) no description of the source

### Comparability

- 1) Comparability of cases and controls based on the design or analysis
  - a) study controls for \_\_\_\_\_ (Select the most important factor.) \*
  - b) study controls for any additional factor \* (This criteria could be modified to indicate a specific control for a second important factor.)

### Exposure

- 1) Ascertainment of exposure
  - a) secure record (e.g., surgical records) \*
  - b) structured interview where the interviewer was blinded to the case/control status \*
  - c) interviewer was not blinded to the case/control status
  - d) written self-report or medical record only
  - e) no description
- 2) Same method of ascertainment for cases and controls
  - a) yes \*
  - b) no
- 3) Non-response rate
  - a) same rate for both groups \*
  - b) non-respondents described
  - c) rates differed and no designation was provided

**Supplemental Table 6. The GRADE approach**

**Supplemental Table 6.1 The summary of findings table**

| Outcomes | Illustrates comparative risks<br>(95% CI) |                               | Relative<br>effect<br>(95% CI) | No. of<br>Participants<br>(studies)<br>Follow up | Quality of<br>the<br>evidence<br>(GRADE) | Overall<br>results |
|----------|-------------------------------------------|-------------------------------|--------------------------------|--------------------------------------------------|------------------------------------------|--------------------|
|          | Assumed risk<br>Group 1                   | Corresponding risk<br>Group 2 |                                |                                                  |                                          |                    |
|          |                                           |                               |                                |                                                  |                                          |                    |
|          |                                           |                               |                                |                                                  |                                          |                    |
|          |                                           |                               |                                |                                                  |                                          |                    |
|          |                                           |                               |                                |                                                  |                                          |                    |

**Supplemental Table 6.2 GRADE evidence profile**

| Quality assessment |        |                    |               |              |             |                         | No. of patients |         | Effect                  | Quality |
|--------------------|--------|--------------------|---------------|--------------|-------------|-------------------------|-----------------|---------|-------------------------|---------|
| No. of<br>studies  | Design | Risk<br>of<br>bias | Inconsistency | Indirectness | Imprecision | Other<br>considerations | Group<br>1      | Group 2 | Relative<br>(95%<br>CI) |         |
| Outcome 1          |        |                    |               |              |             |                         |                 |         |                         |         |
|                    |        |                    |               |              |             |                         |                 |         |                         |         |
| Outcome 2          |        |                    |               |              |             |                         |                 |         |                         |         |
|                    |        |                    |               |              |             |                         |                 |         |                         |         |
| Outcome 3          |        |                    |               |              |             |                         |                 |         |                         |         |
|                    |        |                    |               |              |             |                         |                 |         |                         |         |
| Outcome 4          |        |                    |               |              |             |                         |                 |         |                         |         |
|                    |        |                    |               |              |             |                         |                 |         |                         |         |

**Supplemental Table 6.3 Quality of evidence grades**

| Grade    | Definition                                                                                                                                                     |
|----------|----------------------------------------------------------------------------------------------------------------------------------------------------------------|
| High     | We are very confident that the true effect lies is similar to the estimate of the effect.                                                                      |
| Moderate | We are moderately confident in the effect estimate: the true effect is likely to be close to the estimate of the effect, but it may be substantially different |
| Low      | Our confidence in the effect estimate is limited: the true effect may be substantially different from the estimate of the effect.                              |
| Very Low | We have very little confidence in the effect estimate: the true effect is likely to be substantially different from the estimate of the effect.                |

**Supplemental Table 6.4 Factors that may reduce the quality of the evidence**

| Factor                                                      | Consequence     |
|-------------------------------------------------------------|-----------------|
| Limitations in the study design or execution (risk of bias) | ↓ 1 or 2 levels |
| Inconsistency of the results                                | ↓ 1 or 2 levels |
| Indirectness of the evidence                                | ↓ 1 or 2 levels |
| Imprecision                                                 | ↓ 1 or 2 levels |
| Publication bias                                            | ↓ 1 or 2 levels |

**Supplemental Table 6.5 Factors that may increase the quality of the evidence**

| Factor                                                                                                               | Consequence     |
|----------------------------------------------------------------------------------------------------------------------|-----------------|
| Large magnitude of effect                                                                                            | ↑ 1 or 2 levels |
| All plausible confounding factors would reduce the described effect or increase the effect if no effect was observed | ↑ 1 level       |
| Dose-response gradient                                                                                               | ↑ 1 level       |

# Reporting checklist for protocol of a systematic review.

Based on the PRISMA-P guidelines.

## Instructions to authors

Complete this checklist by entering the page numbers from your manuscript where readers will find each of the items listed below.

Your article may not currently address all the items on the checklist. Please modify your text to include the missing information. If you are certain that an item does not apply, please write "n/a" and provide a short explanation.

Upload your completed checklist as an extra file when you submit to a journal.

In your methods section, say that you used the PRISMA-Reporting guidelines, and cite them as:

Moher D, Shamseer L, Clarke M, Ghersi D, Liberati A, Petticrew M, Shekelle P, Stewart LA. Preferred Reporting Items for Systematic Review and Meta-Analysis Protocols (PRISMA-P) 2015 statement. *Syst Rev.* 2015;4(1):1.

|                     |                     | Reporting Item                                                                                                                            | Page Number |
|---------------------|---------------------|-------------------------------------------------------------------------------------------------------------------------------------------|-------------|
| <b>Title</b>        |                     |                                                                                                                                           |             |
| Identification      | <a href="#">#1a</a> | Identify the report as a protocol of a systematic review                                                                                  | 1           |
| Update              | <a href="#">#1b</a> | If the protocol is for an update of a previous systematic review, identify as such                                                        | 2           |
| <b>Registration</b> |                     |                                                                                                                                           |             |
|                     | <a href="#">#2</a>  | If registered, provide the name of the registry (such as PROSPERO) and registration number                                                | 3           |
| <b>Authors</b>      |                     |                                                                                                                                           |             |
| Contact             | <a href="#">#3a</a> | Provide name, institutional affiliation, e-mail address of all protocol authors; provide physical mailing address of corresponding author | 1           |

|    |                                 |                                          |                                                                                                                                                                                                                               |      |
|----|---------------------------------|------------------------------------------|-------------------------------------------------------------------------------------------------------------------------------------------------------------------------------------------------------------------------------|------|
| 1  | Contribution                    | <a href="#">#3b</a>                      | Describe contributions of protocol authors and identify the guarantor of the review                                                                                                                                           | 12   |
| 2  |                                 |                                          |                                                                                                                                                                                                                               |      |
| 3  |                                 |                                          |                                                                                                                                                                                                                               |      |
| 4  |                                 |                                          |                                                                                                                                                                                                                               |      |
| 5  | <b>Amendments</b>               |                                          |                                                                                                                                                                                                                               |      |
| 6  |                                 |                                          |                                                                                                                                                                                                                               |      |
| 7  |                                 | <a href="#">#4</a>                       | If the protocol represents an amendment of a previously completed or published protocol, identify as such and list changes; otherwise, state plan for documenting important protocol amendments                               | 2    |
| 8  |                                 |                                          |                                                                                                                                                                                                                               |      |
| 9  |                                 |                                          |                                                                                                                                                                                                                               |      |
| 10 |                                 |                                          |                                                                                                                                                                                                                               |      |
| 11 |                                 |                                          |                                                                                                                                                                                                                               |      |
| 12 |                                 |                                          |                                                                                                                                                                                                                               |      |
| 13 |                                 |                                          |                                                                                                                                                                                                                               |      |
| 14 | <b>Support</b>                  |                                          |                                                                                                                                                                                                                               |      |
| 15 |                                 |                                          |                                                                                                                                                                                                                               |      |
| 16 | Sources                         | <a href="#">#5a</a>                      | Indicate sources of financial or other support for the review                                                                                                                                                                 | 1    |
| 17 |                                 |                                          |                                                                                                                                                                                                                               |      |
| 18 | Sponsor                         | <a href="#">#5b</a>                      | Provide name for the review funder and / or sponsor                                                                                                                                                                           | 1    |
| 19 |                                 |                                          |                                                                                                                                                                                                                               |      |
| 20 |                                 |                                          |                                                                                                                                                                                                                               |      |
| 21 | Role of sponsor or funder       | <a href="#">#5c</a>                      | Describe roles of funder(s), sponsor(s), and / or institution(s), if any, in developing the protocol                                                                                                                          | 1    |
| 22 |                                 |                                          |                                                                                                                                                                                                                               |      |
| 23 |                                 |                                          |                                                                                                                                                                                                                               |      |
| 24 |                                 |                                          |                                                                                                                                                                                                                               |      |
| 25 | <b>Introduction</b>             |                                          |                                                                                                                                                                                                                               |      |
| 26 |                                 |                                          |                                                                                                                                                                                                                               |      |
| 27 | Rationale                       | <a href="#">#6</a>                       | Describe the rationale for the review in the context of what is already known                                                                                                                                                 | 5-6  |
| 28 |                                 |                                          |                                                                                                                                                                                                                               |      |
| 29 |                                 |                                          |                                                                                                                                                                                                                               |      |
| 30 |                                 |                                          |                                                                                                                                                                                                                               |      |
| 31 | Objectives                      | <a href="#">#7</a>                       | Provide an explicit statement of the question(s) the review will address with reference to participants, interventions, comparators, and outcomes (PICO)                                                                      | 6    |
| 32 |                                 |                                          |                                                                                                                                                                                                                               |      |
| 33 |                                 |                                          |                                                                                                                                                                                                                               |      |
| 34 |                                 |                                          |                                                                                                                                                                                                                               |      |
| 35 |                                 |                                          |                                                                                                                                                                                                                               |      |
| 36 | <b>Methods</b>                  |                                          |                                                                                                                                                                                                                               |      |
| 37 |                                 |                                          |                                                                                                                                                                                                                               |      |
| 38 | Eligibility criteria            | <a href="#">#8</a>                       | Specify the study characteristics (such as PICO, study design, setting, time frame) and report characteristics (such as years considered, language, publication status) to be used as criteria for eligibility for the review | 7-8  |
| 39 |                                 |                                          |                                                                                                                                                                                                                               |      |
| 40 |                                 |                                          |                                                                                                                                                                                                                               |      |
| 41 |                                 |                                          |                                                                                                                                                                                                                               |      |
| 42 |                                 |                                          |                                                                                                                                                                                                                               |      |
| 43 |                                 |                                          |                                                                                                                                                                                                                               |      |
| 44 |                                 |                                          |                                                                                                                                                                                                                               |      |
| 45 | Information sources             | <a href="#">#9</a>                       | Describe all intended information sources (such as electronic databases, contact with study authors, trial registers or other grey literature sources) with planned dates of coverage                                         | 6-7  |
| 46 |                                 |                                          |                                                                                                                                                                                                                               |      |
| 47 |                                 |                                          |                                                                                                                                                                                                                               |      |
| 48 |                                 |                                          |                                                                                                                                                                                                                               |      |
| 49 |                                 |                                          |                                                                                                                                                                                                                               |      |
| 50 |                                 |                                          |                                                                                                                                                                                                                               |      |
| 51 | Search strategy                 | <a href="#">#10</a>                      | Present draft of search strategy to be used for at least one electronic database, including planned limits, such that it could be repeated                                                                                    | 7    |
| 52 |                                 |                                          |                                                                                                                                                                                                                               |      |
| 53 |                                 |                                          |                                                                                                                                                                                                                               |      |
| 54 |                                 |                                          |                                                                                                                                                                                                                               |      |
| 55 |                                 |                                          |                                                                                                                                                                                                                               |      |
| 56 | Study records - data management | <a href="#">#11</a><br><a href="#">a</a> | Describe the mechanism(s) that will be used to manage records and data throughout the review                                                                                                                                  | 2, 8 |
| 57 |                                 |                                          |                                                                                                                                                                                                                               |      |
| 58 |                                 |                                          |                                                                                                                                                                                                                               |      |
| 59 |                                 |                                          |                                                                                                                                                                                                                               |      |
| 60 |                                 |                                          |                                                                                                                                                                                                                               |      |

|    |                    |                     |                                                                                 |       |
|----|--------------------|---------------------|---------------------------------------------------------------------------------|-------|
| 1  | Study records -    | <a href="#">#11</a> | State the process that will be used for selecting studies (such                 | 8     |
| 2  | selection process  | <a href="#">b</a>   | as two independent reviewers) through each phase of the                         |       |
| 3  |                    |                     | review (that is, screening, eligibility and inclusion in meta-                  |       |
| 4  |                    |                     | analysis)                                                                       |       |
| 5  |                    |                     |                                                                                 |       |
| 6  |                    |                     |                                                                                 |       |
| 7  |                    |                     |                                                                                 |       |
| 8  | Study records -    | <a href="#">#11</a> | Describe planned method of extracting data from reports                         | 8-9   |
| 9  | data collection    | <a href="#">c</a>   | (such as piloting forms, done independently, in duplicate),                     |       |
| 10 | process            |                     | any processes for obtaining and confirming data from                            |       |
| 11 |                    |                     | investigators                                                                   |       |
| 12 |                    |                     |                                                                                 |       |
| 13 |                    |                     |                                                                                 |       |
| 14 | Data items         | <a href="#">#12</a> | List and define all variables for which data will be sought                     | 8-9   |
| 15 |                    |                     | (such as PICO items, funding sources), any pre-planned data                     |       |
| 16 |                    |                     | assumptions and simplifications                                                 |       |
| 17 |                    |                     |                                                                                 |       |
| 18 |                    |                     |                                                                                 |       |
| 19 |                    |                     |                                                                                 |       |
| 20 | Outcomes and       | <a href="#">#13</a> | List and define all outcomes for which data will be sought,                     | 8-9   |
| 21 | prioritization     |                     | including prioritization of main and additional outcomes, with                  |       |
| 22 |                    |                     | rationale                                                                       |       |
| 23 |                    |                     |                                                                                 |       |
| 24 |                    |                     |                                                                                 |       |
| 25 | Risk of bias in    | <a href="#">#14</a> | Describe anticipated methods for assessing risk of bias of                      | 9     |
| 26 | individual studies |                     | individual studies, including whether this will be done at the                  |       |
| 27 |                    |                     | outcome or study level, or both; state how this information                     |       |
| 28 |                    |                     | will be used in data synthesis                                                  |       |
| 29 |                    |                     |                                                                                 |       |
| 30 |                    |                     |                                                                                 |       |
| 31 |                    |                     |                                                                                 |       |
| 32 | Data synthesis     | <a href="#">#15</a> | Describe criteria under which study data will be quantitatively                 | 10    |
| 33 |                    | <a href="#">a</a>   | synthesised                                                                     |       |
| 34 |                    |                     |                                                                                 |       |
| 35 |                    |                     |                                                                                 |       |
| 36 | Data synthesis     | <a href="#">#15</a> | If data are appropriate for quantitative synthesis, describe                    | 10    |
| 37 |                    | <a href="#">b</a>   | planned summary measures, methods of handling data and                          |       |
| 38 |                    |                     | methods of combining data from studies, including any                           |       |
| 39 |                    |                     | planned exploration of consistency (such as I <sup>2</sup> , Kendall's $\tau$ ) |       |
| 40 |                    |                     |                                                                                 |       |
| 41 |                    |                     |                                                                                 |       |
| 42 |                    |                     |                                                                                 |       |
| 43 | Data synthesis     | <a href="#">#15</a> | Describe any proposed additional analyses (such as                              | 10-11 |
| 44 |                    | <a href="#">c</a>   | sensitivity or subgroup analyses, meta-regression)                              |       |
| 45 |                    |                     |                                                                                 |       |
| 46 |                    |                     |                                                                                 |       |
| 47 | Data synthesis     | <a href="#">#15</a> | If quantitative synthesis is not appropriate, describe the type                 | 10    |
| 48 |                    | <a href="#">d</a>   | of summary planned                                                              |       |
| 49 |                    |                     |                                                                                 |       |
| 50 |                    |                     |                                                                                 |       |
| 51 | Meta-bias(es)      | <a href="#">#16</a> | Specify any planned assessment of meta-bias(es) (such as                        | 10    |
| 52 |                    |                     | publication bias across studies, selective reporting within                     |       |
| 53 |                    |                     | studies)                                                                        |       |
| 54 |                    |                     |                                                                                 |       |
| 55 |                    |                     |                                                                                 |       |
| 56 | Confidence in      | <a href="#">#17</a> | Describe how the strength of the body of evidence will be                       | 11    |
| 57 | cumulative         |                     | assessed (such as GRADE)                                                        |       |
| 58 | evidence           |                     |                                                                                 |       |
| 59 |                    |                     |                                                                                 |       |
| 60 |                    |                     |                                                                                 |       |

1 None The PRISMA-P checklist is distributed under the terms of the Creative Commons Attribution  
2 License CC-BY 4.0. This checklist can be completed online using <https://www.goodreports.org/>, a tool  
3 made by the [EQUATOR Network](#) in collaboration with [Penelope.ai](#)  
4  
5  
6  
7  
8  
9  
10  
11  
12  
13  
14  
15  
16  
17  
18  
19  
20  
21  
22  
23  
24  
25  
26  
27  
28  
29  
30  
31  
32  
33  
34  
35  
36  
37  
38  
39  
40  
41  
42  
43  
44  
45  
46  
47  
48  
49  
50  
51  
52  
53  
54  
55  
56  
57  
58  
59  
60

For peer review only
