# Supplementary material for: Platelet transfusion for neonates with thrombocytopaenia: protocol for a systematic review
Source: PubMed Central journal article supplement — BMJ Open. 2020 Oct 16;10(10):e039132. doi: 10.1136/bmjopen-2020-039132 (PMC7569922; doi:10.1136/bmjopen-2020-039132), 2020-10-16
Supplement: bmjopen-2020-039132supp001.pdf [file bmjopen-2020-039132supp001.pdf]

**Supplemental Table 1. Search strategy used for the following databases:  
PubMed, the Cochrane Central Register of Controlled Trials and Embase**

**Table 1.1 PubMed**

| Query |                                        |
|-------|----------------------------------------|
| #1    | “Platelet Transfusion” [MeSH]          |
| #2    | platelet transfus*                     |
| #3    | platelet infus*                        |
| #4    | platelet administrat*                  |
| #5    | PT                                     |
| #6    | thrombocyte transfus*                  |
| #7    | thrombocyte infus*                     |
| #8    | thrombocyte administrat*               |
| #9    | “Thrombocytopenia” [MeSH]              |
| #10   | thrombocytopen*                        |
| #11   | NT                                     |
| #12   | “Infant, Newborn” [MeSH]               |
| #13   | infant                                 |
| #14   | newborn                                |
| #15   | neonat*                                |
| #16   | preterm                                |
| #17   | prematu*                               |
| #18   | #1 or #3 or #4 or #5 or #6 or #7 or #8 |
| #19   | #9 or #10 or #11                       |
| #20   | #12 or #13 or #14 or #15 or #16 or #17 |
| #21   | 18 and #19 and #20 Filters: Humans     |

**Table 1.2 The Cochrane Central Register of Controlled Trials**

| Query |                                                                          |
|-------|--------------------------------------------------------------------------|
| #1    | MeSH descriptor: [Platelet Transfusion] explode all trees                |
| #2    | (platelet transfus*): ti, ab, kw (word variations have been searched)    |
| #3    | (platelet infus*): ti, ab, kw (word variations have been searched)       |
| #4    | (platelet administrat*): ti, ab, kw (word variations have been searched) |
| #5    | (PT): ti, ab, kw (word variations have been searched)                    |
| #6    | (thrombocyte transfus*): ti, ab, kw                                      |
| #7    | (thrombocyte infus*): ti, ab, kw                                         |
| #8    | (thrombocyte administrat*): ti, ab, kw                                   |
| #9    | MeSH descriptor: [Thrombocytopenia] explode all trees                    |
| #10   | (thrombocytopeni*): ti, ab, kw (word variations have been searched)      |
| #11   | (NT): ti, ab, kw (word variations have been searched)                    |
| #12   | MeSH descriptor: [Infant, Newborn] explode all trees                     |
| #13   | (infant): ti, ab, kw                                                     |
| #14   | (newborn): ti, ab, kw                                                    |
| #15   | (neonat*): ti, ab, kw                                                    |
| #16   | (preterm): ti, ab, kw                                                    |
| #17   | (premat*): ti, ab, kw                                                    |
| #18   | #1 or #3 or #4 or #5 or #6 or #7 or #8                                   |
| #19   | #9 or #10 or #11                                                         |
| #20   | #1 or #3 or #4 or #5 or #6 or #7 or #8 or #9 or #10                      |
| #21   | 18 and #19 and #20 in Trials                                             |

**Table 1.3 Embase**

| Query |                                                                                                                                                                                                                                                                                                                                                                                                                                                                                                                                                                                                                  |
|-------|------------------------------------------------------------------------------------------------------------------------------------------------------------------------------------------------------------------------------------------------------------------------------------------------------------------------------------------------------------------------------------------------------------------------------------------------------------------------------------------------------------------------------------------------------------------------------------------------------------------|
| #1    | 'thrombocyte transfusion'/exp                                                                                                                                                                                                                                                                                                                                                                                                                                                                                                                                                                                    |
| #2    | thrombocyte transfus*                                                                                                                                                                                                                                                                                                                                                                                                                                                                                                                                                                                            |
| #3    | thrombocyte infus*                                                                                                                                                                                                                                                                                                                                                                                                                                                                                                                                                                                               |
| #4    | thrombocyte administrat*                                                                                                                                                                                                                                                                                                                                                                                                                                                                                                                                                                                         |
| #5    | 'platelet transfusion'/exp OR 'platelet transfusion'                                                                                                                                                                                                                                                                                                                                                                                                                                                                                                                                                             |
| #6    | platelet transfus*                                                                                                                                                                                                                                                                                                                                                                                                                                                                                                                                                                                               |
| #7    | platelet infus*                                                                                                                                                                                                                                                                                                                                                                                                                                                                                                                                                                                                  |
| #8    | platelet administrat*                                                                                                                                                                                                                                                                                                                                                                                                                                                                                                                                                                                            |
| #9    | pt                                                                                                                                                                                                                                                                                                                                                                                                                                                                                                                                                                                                               |
| #10   | 'thrombocytopenia'/exp                                                                                                                                                                                                                                                                                                                                                                                                                                                                                                                                                                                           |
| #11   | thrombocytopen*                                                                                                                                                                                                                                                                                                                                                                                                                                                                                                                                                                                                  |
| #12   | nt                                                                                                                                                                                                                                                                                                                                                                                                                                                                                                                                                                                                               |
| #13   | 'newborn'/exp                                                                                                                                                                                                                                                                                                                                                                                                                                                                                                                                                                                                    |
| #14   | infant                                                                                                                                                                                                                                                                                                                                                                                                                                                                                                                                                                                                           |
| #15   | newborn                                                                                                                                                                                                                                                                                                                                                                                                                                                                                                                                                                                                          |
| #16   | neonat*                                                                                                                                                                                                                                                                                                                                                                                                                                                                                                                                                                                                          |
| #17   | preterm                                                                                                                                                                                                                                                                                                                                                                                                                                                                                                                                                                                                          |
| #18   | prematur*                                                                                                                                                                                                                                                                                                                                                                                                                                                                                                                                                                                                        |
| #19   | #1 or #3 or #4 or #5 or #6 or #7 or #8 or #9                                                                                                                                                                                                                                                                                                                                                                                                                                                                                                                                                                     |
| #20   | #10 or #11 or #12                                                                                                                                                                                                                                                                                                                                                                                                                                                                                                                                                                                                |
| #21   | #13 or #14 or #15 or #16 or #17 or #18                                                                                                                                                                                                                                                                                                                                                                                                                                                                                                                                                                           |
| #22   | #19 AND #20 AND #21 AND ('clinical article'/de OR 'clinical study'/de OR 'clinical trial'/de OR 'clinical trial topic'/de OR 'cohort analysis'/de OR 'controlled clinical trial'/de OR 'controlled study'/de OR 'feasibility study'/de OR 'human'/de OR 'human experiment'/de OR 'intermethod comparison'/de OR 'major clinical study'/de OR 'multicenter study'/de OR 'observational study'/de OR 'open study'/de OR 'outcomes research'/de OR 'phase 2 clinical trial'/de OR 'prospective study'/de OR 'randomized controlled trial'/de OR 'randomized controlled trial topic'/de OR 'retrospective study'/de) |
