# Supplementary material for: Platelet transfusion for neonates with thrombocytopaenia: protocol for a systematic review
Source: PubMed Central journal article supplement — BMJ Open. 2020 Oct 16;10(10):e039132. doi: 10.1136/bmjopen-2020-039132 (PMC7569922; doi:10.1136/bmjopen-2020-039132), 2020-10-16

**Supplemental Figure 1. Flow Diagram of Studies Selected for Inclusion in the Systematic Review (PRISMA 2009 Flow Diagram)**

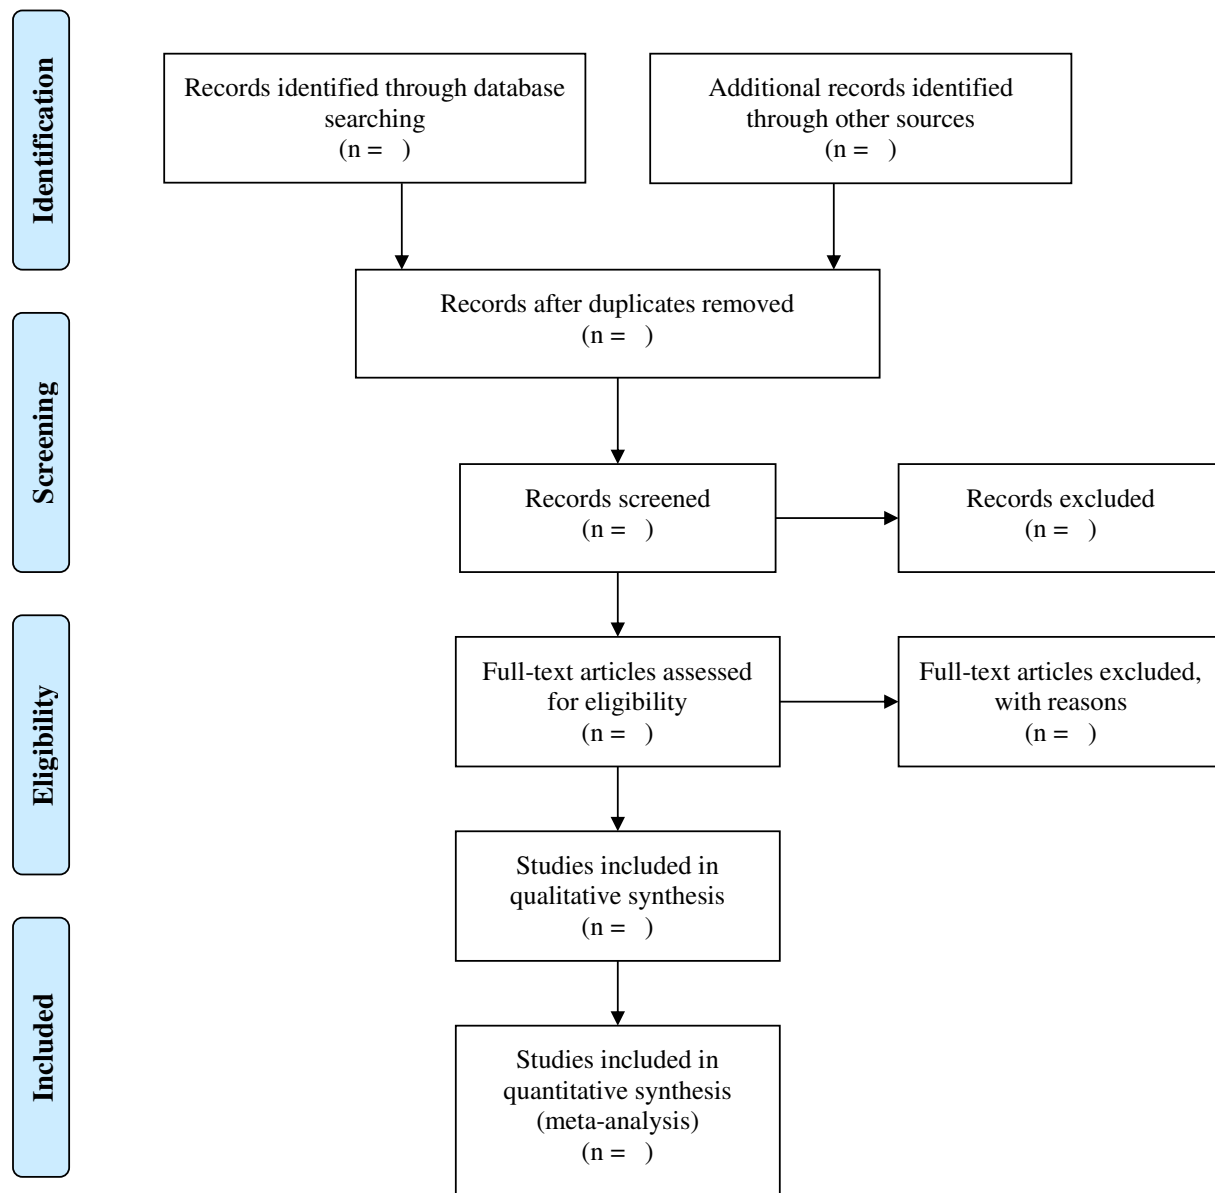

Supplement: bmjopen-2020-039132supp003.pdf [file bmjopen-2020-039132supp003.pdf]
