# Supplementary material for: Platelet transfusion for neonates with thrombocytopaenia: protocol for a systematic review
Source: PubMed Central journal article supplement — BMJ Open. 2020 Oct 16;10(10):e039132. doi: 10.1136/bmjopen-2020-039132 (PMC7569922; doi:10.1136/bmjopen-2020-039132), 2020-10-16
Supplement: bmjopen-2020-039132supp004.pdf [file bmjopen-2020-039132supp004.pdf]

**Supplemental Table 3.1 Data extraction sheet for RCTs**

| Publication and study details                  |                                                           |                          |                    |                                                      |                     |               |
|------------------------------------------------|-----------------------------------------------------------|--------------------------|--------------------|------------------------------------------------------|---------------------|---------------|
| Authors                                        |                                                           |                          |                    |                                                      |                     |               |
| Year of publication                            |                                                           |                          |                    |                                                      |                     |               |
| Country                                        |                                                           |                          |                    |                                                      |                     |               |
| Study design                                   |                                                           |                          |                    |                                                      |                     |               |
| Number of participants                         |                                                           |                          |                    |                                                      |                     |               |
| Groups                                         | Experimental platelet count threshold ( $\times 10^9/L$ ) |                          |                    | Control platelet count threshold ( $\times 10^9/L$ ) |                     |               |
|                                                |                                                           |                          |                    |                                                      |                     |               |
| Clinical characteristics                       |                                                           |                          |                    |                                                      |                     |               |
|                                                | Experimental median (or mean)                             | Experimental IQR (or SD) | Experimental total | Control median (or mean)                             | Control IQR (or SD) | Control total |
| GA (w)                                         |                                                           |                          |                    |                                                      |                     |               |
| BW (g)                                         |                                                           |                          |                    |                                                      |                     |               |
| Platelet count ( $\times 10^9/L$ )             |                                                           |                          |                    |                                                      |                     |               |
| Number of platelet transfusions                |                                                           |                          |                    |                                                      |                     |               |
| Primary outcomes                               |                                                           |                          |                    |                                                      |                     |               |
|                                                | Experimental event                                        | Experimental total       | Control event      | Control total                                        |                     |               |
| In-hospital mortality or major bleeding events |                                                           |                          |                    |                                                      |                     |               |
| Bleeding episodes                              |                                                           |                          |                    |                                                      |                     |               |
| IVH                                            |                                                           |                          |                    |                                                      |                     |               |
| ICH                                            |                                                           |                          |                    |                                                      |                     |               |
| PH                                             |                                                           |                          |                    |                                                      |                     |               |
| Frank rectal bleeding                          |                                                           |                          |                    |                                                      |                     |               |
| Other bleeding                                 |                                                           |                          |                    |                                                      |                     |               |
| Secondary outcomes                             |                                                           |                          |                    |                                                      |                     |               |
| Major morbidity                                |                                                           |                          |                    |                                                      |                     |               |
|                                                | Experimental event                                        | Experimental total       | Control event      | Control total                                        |                     |               |
| PDA                                            |                                                           |                          |                    |                                                      |                     |               |

|                                     |                               |                          |                    |                          |                     |               |
|-------------------------------------|-------------------------------|--------------------------|--------------------|--------------------------|---------------------|---------------|
| BPD                                 |                               |                          |                    |                          |                     |               |
| Sepsis                              |                               |                          |                    |                          |                     |               |
| NEC                                 |                               |                          |                    |                          |                     |               |
| ROP                                 |                               |                          |                    |                          |                     |               |
| <b>Other outcome measures</b>       |                               |                          |                    |                          |                     |               |
| LOS (days)                          | Experimental median (or mean) | Experimental IQR (or SD) | Experimental total | Control median (or mean) | Control IQR (or SD) | Control total |
|                                     |                               |                          |                    |                          |                     |               |
| Adverse effects of transfusion      | Experimental event            | Experimental total       | Control event      |                          | Control total       |               |
|                                     |                               |                          |                    |                          |                     |               |
| <b>Other information</b>            |                               |                          |                    |                          |                     |               |
| Type and dose of platelet component |                               |                          |                    |                          |                     |               |
| Any sponsorship or funding          |                               |                          |                    |                          |                     |               |

IQR: interquartile range; SD: standard deviation; GA: gestational age; BW: birth weight; IVH: intraventricular haemorrhage; ICH: intracranial haemorrhage; PH: pulmonary haemorrhage; BPD: bronchopulmonary dysplasia; NEC: necrotizing enterocolitis; PDA: patent ductus arteriosus; NEC: necrotizing enterocolitis; ROP: retinopathy of prematurity; LOS: length of stay
