# Supplementary material for: Platelet transfusion for neonates with thrombocytopaenia: protocol for a systematic review
Source: PubMed Central journal article supplement — BMJ Open. 2020 Oct 16;10(10):e039132. doi: 10.1136/bmjopen-2020-039132 (PMC7569922; doi:10.1136/bmjopen-2020-039132), 2020-10-16
Supplement: bmjopen-2020-039132supp005.pdf [file bmjopen-2020-039132supp005.pdf]

Supplemental Table 3.2 Data extraction sheet for cohort studies

| Publication and study details                  |                                                      |                     |               |                                                      |                     |               |                                                      |                     |               |
|------------------------------------------------|------------------------------------------------------|---------------------|---------------|------------------------------------------------------|---------------------|---------------|------------------------------------------------------|---------------------|---------------|
| Authors                                        |                                                      |                     |               |                                                      |                     |               |                                                      |                     |               |
| Year of publication                            |                                                      |                     |               |                                                      |                     |               |                                                      |                     |               |
| Country                                        |                                                      |                     |               |                                                      |                     |               |                                                      |                     |               |
| Study design                                   |                                                      |                     |               |                                                      |                     |               |                                                      |                     |               |
| Number of participants                         |                                                      |                     |               |                                                      |                     |               |                                                      |                     |               |
| Groups                                         | Group 1 platelet count threshold ( $\times 10^9/L$ ) |                     |               | Group 2 platelet count threshold ( $\times 10^9/L$ ) |                     |               | Group N platelet count threshold ( $\times 10^9/L$ ) |                     |               |
|                                                |                                                      |                     |               |                                                      |                     |               |                                                      |                     |               |
| Clinical characteristics                       |                                                      |                     |               |                                                      |                     |               |                                                      |                     |               |
|                                                | Group 1 median (or mean)                             | Group 1 IQR (or SD) | Group 1 total | Group 2 median (or mean)                             | Group 2 IQR (or SD) | Group 2 total | Group N median (or mean)                             | Group N IQR (or SD) | Group N total |
| GA (w)                                         |                                                      |                     |               |                                                      |                     |               |                                                      |                     |               |
| BW (g)                                         |                                                      |                     |               |                                                      |                     |               |                                                      |                     |               |
| Platelet count $\times 10^9/L$                 |                                                      |                     |               |                                                      |                     |               |                                                      |                     |               |
| Number of platelet transfusions                |                                                      |                     |               |                                                      |                     |               |                                                      |                     |               |
| Primary outcomes                               |                                                      |                     |               |                                                      |                     |               |                                                      |                     |               |
|                                                | Group 1 event                                        | Group 1 total       | Group 2 event | Group 2 total                                        | Group N event       | Group N total |                                                      |                     |               |
| In-hospital mortality or major bleeding events |                                                      |                     |               |                                                      |                     |               |                                                      |                     |               |
| Bleeding episodes                              |                                                      |                     |               |                                                      |                     |               |                                                      |                     |               |
| IVH                                            |                                                      |                     |               |                                                      |                     |               |                                                      |                     |               |
| ICH                                            |                                                      |                     |               |                                                      |                     |               |                                                      |                     |               |
| PH                                             |                                                      |                     |               |                                                      |                     |               |                                                      |                     |               |
| Frank rectal bleeding                          |                                                      |                     |               |                                                      |                     |               |                                                      |                     |               |
| Other bleeding                                 |                                                      |                     |               |                                                      |                     |               |                                                      |                     |               |
| Secondary outcomes                             |                                                      |                     |               |                                                      |                     |               |                                                      |                     |               |
| Major morbidity                                |                                                      |                     |               |                                                      |                     |               |                                                      |                     |               |
|                                                | Group 1                                              | Group 1 total       | Group 2       | Group 2 total                                        | Group N event       | Group N total |                                                      |                     |               |

|                                           | event                             |                           |                  | event                             |                           |                  |                                   |                           |                  |
|-------------------------------------------|-----------------------------------|---------------------------|------------------|-----------------------------------|---------------------------|------------------|-----------------------------------|---------------------------|------------------|
| PDA                                       |                                   |                           |                  |                                   |                           |                  |                                   |                           |                  |
| BPD                                       |                                   |                           |                  |                                   |                           |                  |                                   |                           |                  |
| Sepsis                                    |                                   |                           |                  |                                   |                           |                  |                                   |                           |                  |
| NEC                                       |                                   |                           |                  |                                   |                           |                  |                                   |                           |                  |
| ROP                                       |                                   |                           |                  |                                   |                           |                  |                                   |                           |                  |
| Other outcome measures                    |                                   |                           |                  |                                   |                           |                  |                                   |                           |                  |
| LOS (days)                                | Group 1<br>median<br>(or<br>mean) | Group 1<br>IQR (or<br>SD) | Group 1<br>total | Group 2<br>median<br>(or<br>mean) | Group 2<br>IQR (or<br>SD) | Group 2<br>total | Group N<br>median<br>(or<br>mean) | Group N<br>IQR (or<br>SD) | Group N<br>total |
|                                           |                                   |                           |                  |                                   |                           |                  |                                   |                           |                  |
| Adverse effects of<br>transfusion         | Group 1<br>event                  |                           | Group 1 total    | Group 2<br>event                  |                           | Group 2 total    | Group N event                     |                           | Group N total    |
|                                           |                                   |                           |                  |                                   |                           |                  |                                   |                           |                  |
| Other information                         |                                   |                           |                  |                                   |                           |                  |                                   |                           |                  |
| Type and dose of<br>platelet<br>component |                                   |                           |                  |                                   |                           |                  |                                   |                           |                  |
| Any sponsorship<br>or funding             |                                   |                           |                  |                                   |                           |                  |                                   |                           |                  |

IQR: interquartile range; SD: standard deviation; GA: gestational age; BW: birth weight; IVH: intraventricular haemorrhage; ICH: intracranial haemorrhage; PH: pulmonary haemorrhage; BPD: bronchopulmonary dysplasia; NEC: necrotizing enterocolitis; PDA: patent ductus arteriosus; NEC: necrotizing enterocolitis; ROP: retinopathy of prematurity; LOS: length of stay
