# Supplementary material for: Platelet transfusion for neonates with thrombocytopaenia: protocol for a systematic review
Source: PubMed Central journal article supplement — BMJ Open. 2020 Oct 16;10(10):e039132. doi: 10.1136/bmjopen-2020-039132 (PMC7569922; doi:10.1136/bmjopen-2020-039132), 2020-10-16
Supplement: bmjopen-2020-039132supp006.pdf [file bmjopen-2020-039132supp006.pdf]

**Supplemental Table 3.3 Data extraction sheet for case control studies**

| Publication and study details                                     |      |         |
|-------------------------------------------------------------------|------|---------|
| Authors                                                           |      |         |
| Year of publication                                               |      |         |
| Country                                                           |      |         |
| Study design                                                      |      |         |
| Number of participants                                            |      |         |
| <b>Outcome measure<sup>a</sup></b>                                |      |         |
| Clinical characteristics                                          |      |         |
|                                                                   | Case | Control |
| GA (w)                                                            |      |         |
| BW (g)                                                            |      |         |
| Platelet count ( $\times 10^9/L$ )                                |      |         |
| Platelet transfusion                                              |      |         |
| Platelet transfusion threshold 1 ( $\times 10^9/L$ ) <sup>b</sup> |      |         |
| Platelet transfusion threshold 2 ( $\times 10^9/L$ ) <sup>b</sup> |      |         |
| Number of platelet transfusions                                   |      |         |
| Other information                                                 |      |         |
| Type and dose of platelet component                               |      |         |
| Any sponsorship or funding                                        |      |         |

a The outcome measure to distinguish the case and the control group include: in-hospital mortality or bleeding episodes [including intraventricular haemorrhage (IVH), intracranial haemorrhage (ICH), pulmonary haemorrhage (PH), frank rectal bleeding, and other bleeding], morbidity [including patent ductus arteriosus (PDA), sepsis, necrotizing enterocolitis (NEC), bronchopulmonary dysplasia (BPD), retinopathy of prematurity (ROP), etc.] and adverse effects of transfusion.

b If the different platelet transfusion thresholds cannot be obtained, we will only record as “platelet transfusion” and “without platelet transfusion”.
