# Supplementary material for: Platelet transfusion for neonates with thrombocytopaenia: protocol for a systematic review
Source: PubMed Central journal article supplement — BMJ Open. 2020 Oct 16;10(10):e039132. doi: 10.1136/bmjopen-2020-039132 (PMC7569922; doi:10.1136/bmjopen-2020-039132), 2020-10-16
Supplement: bmjopen-2020-039132supp008.pdf [file bmjopen-2020-039132supp008.pdf]

**Supplemental Table 5. The Newcastle-Ottawa Scale (NOS) for cohort studies and case control studies**

**Supplemental Table 5.1 The Newcastle-Ottawa Scale (NOS) for cohort studies**

| Study | Item & score                                 |                                         |                               |                                                                                  |                                                                    |                           |                                                                |                                          |
|-------|----------------------------------------------|-----------------------------------------|-------------------------------|----------------------------------------------------------------------------------|--------------------------------------------------------------------|---------------------------|----------------------------------------------------------------|------------------------------------------|
|       | Selection                                    |                                         |                               |                                                                                  | Comparability                                                      | Outcome                   |                                                                |                                          |
|       | Representativeness of the exposed cohort (1) | Selection of the non-exposed cohort (1) | Ascertainment of exposure (1) | Demonstration that the outcome of interest was not present at start of study (1) | Compare the ability of cohorts based on the design or analysis (2) | Assessment of outcome (1) | Was the follow-up period long enough for outcomes to occur (1) | Adequacy of the follow-up of cohorts (1) |
|       |                                              |                                         |                               |                                                                                  |                                                                    |                           |                                                                |                                          |
|       |                                              |                                         |                               |                                                                                  |                                                                    |                           |                                                                |                                          |
|       |                                              |                                         |                               |                                                                                  |                                                                    |                           |                                                                |                                          |
|       |                                              |                                         |                               |                                                                                  |                                                                    |                           |                                                                |                                          |
|       |                                              |                                         |                               |                                                                                  |                                                                    |                           |                                                                |                                          |
|       |                                              |                                         |                               |                                                                                  |                                                                    |                           |                                                                |                                          |

## Supplemental 5.2 NEWCASTLE - OTTAWA QUALITY ASSESSMENT SCALE FOR COHORT STUDIES

Note: A study can be awarded a maximum of one star for each numbered item within the Selection and Outcome categories. A maximum of two stars are possible for Comparability.

### Selection

- 1) Representativeness of the exposed cohort
  - a) truly representative of the average \_\_\_\_\_ (describe) in the community \*
  - b) somewhat representative of the average \_\_\_\_\_ (describe) in the community \*
  - c) selected group of users, e.g., nurses and volunteers
  - d) no description of the derivation of the cohort
- 2) Selection of the non-exposed cohort
  - a) drawn from the same community as the exposed cohort \*
  - b) drawn from a different source
  - c) no description of the derivation of the non-exposed cohort
- 3) Ascertainment of exposure
  - a) secure record (e.g., surgical records) \*
  - b) structured interview \*
  - c) written self-report
  - d) no description
- 4) Demonstration that the outcome of interest was not present at the start of the study
  - a) yes \*
  - b) no

### Comparability

- 1) Comparability of cohorts based on the design or analysis
  - a) study controls for \_\_\_\_\_ (select the most important factor) \*
  - b) study controls for any additional factor \* (This criteria could be modified to indicate a specific control for a second important factor.)

### Outcome

- 1) Assessment of outcome
  - a) independent blinded assessment \*
  - b) record linkage \*
  - c) self-report
  - d) no description
- 2) Was the follow-up period long enough for outcomes to occur
  - a) yes (selected an adequate follow-up period for the outcome of interest) \*
  - b) no
- 3) Adequacy of the follow-up of cohorts
  - a) complete follow up - all subjects accounted for \*
  - b) subjects lost to follow-up, unlikely to introduce bias - small number lost - > \_\_\_\_ % (select an adequate %) follow-up, or description provided of those individuals lost to follow-up) \*
  - c) follow-up rate < \_\_\_\_ % (select an adequate %) and no description of those individuals lost to follow-up
  - d) no statement

**Supplemental Table 5.3 The Newcastle-Ottawa Scale (NOS) for case control studies**

| Study | Item & score                         |                                     |                           |                            |                                                                         |                               |                                                         |                       |
|-------|--------------------------------------|-------------------------------------|---------------------------|----------------------------|-------------------------------------------------------------------------|-------------------------------|---------------------------------------------------------|-----------------------|
|       | Selection                            |                                     |                           |                            | Comparability                                                           | Exposure                      |                                                         |                       |
|       | Is the case definition adequate? (1) | Representativeness of the cases (1) | Selection of Controls (1) | Definition of Controls (1) | Comparability of cases and controls based on the design or analysis (2) | Ascertainment of exposure (1) | Same method of ascertainment for cases and controls (1) | Non-response rate (1) |
|       |                                      |                                     |                           |                            |                                                                         |                               |                                                         |                       |
|       |                                      |                                     |                           |                            |                                                                         |                               |                                                         |                       |
|       |                                      |                                     |                           |                            |                                                                         |                               |                                                         |                       |
|       |                                      |                                     |                           |                            |                                                                         |                               |                                                         |                       |
|       |                                      |                                     |                           |                            |                                                                         |                               |                                                         |                       |
|       |                                      |                                     |                           |                            |                                                                         |                               |                                                         |                       |

## Supplemental 5.4 NEWCASTLE - OTTAWA QUALITY ASSESSMENT SCALE FOR CASE CONTROL STUDIES

Note: A study can be awarded a maximum of one star for each numbered item within the Selection and Exposure categories. A maximum of two stars is possible for Comparability.

### Selection

- 1) Is the case definition adequate?
  - a) yes, with independent validation \*
  - b) yes, e.g., record linkage or based on self-reports
  - c) no description
- 2) Representativeness of the cases
  - a) consecutive or obviously representative series of cases \*
  - b) potential for selection bias or not stated
- 3) Selection of Controls
  - a) community controls \*
  - b) hospital controls
  - c) no description
- 4) Definition of Controls
  - a) no history of disease (endpoint)
  - b) no description of the source

### Comparability

- 1) Comparability of cases and controls based on the design or analysis
  - a) study controls for \_\_\_\_\_ (Select the most important factor.) \*
  - b) study controls for any additional factor \* (This criteria could be modified to indicate a specific control for a second important factor.)

### Exposure

- 1) Ascertainment of exposure
  - a) secure record (e.g., surgical records) \*
  - b) structured interview where the interviewer was blinded to the case/control status \*
  - c) interviewer was not blinded to the case/control status
  - d) written self-report or medical record only
  - e) no description
- 2) Same method of ascertainment for cases and controls
  - a) yes \*
  - b) no
- 3) Non-response rate
  - a) same rate for both groups \*
  - b) non-respondents described
  - c) rates differed and no designation was provided
