# Supplementary material for: Platelet transfusion for neonates with thrombocytopaenia: protocol for a systematic review
Source: PubMed Central journal article supplement — BMJ Open. 2020 Oct 16;10(10):e039132. doi: 10.1136/bmjopen-2020-039132 (PMC7569922; doi:10.1136/bmjopen-2020-039132), 2020-10-16
Supplement: bmjopen-2020-039132supp009.pdf [file bmjopen-2020-039132supp009.pdf]

## Supplemental Table 6. The GRADE approach

### Supplemental Table 6.1 The summary of findings table

| Outcomes | Illustrates comparative risks<br>(95% CI) |                               | Relative<br>effect<br>(95% CI) | No. of<br>Participants<br>(studies)<br>Follow up | Quality of<br>the<br>evidence<br>(GRADE) | Overall<br>results |
|----------|-------------------------------------------|-------------------------------|--------------------------------|--------------------------------------------------|------------------------------------------|--------------------|
|          | Assumed risk<br>Group 1                   | Corresponding risk<br>Group 2 |                                |                                                  |                                          |                    |
|          |                                           |                               |                                |                                                  |                                          |                    |
|          |                                           |                               |                                |                                                  |                                          |                    |
|          |                                           |                               |                                |                                                  |                                          |                    |
|          |                                           |                               |                                |                                                  |                                          |                    |

### Supplemental Table 6.2 GRADE evidence profile

| No. of<br>studies | Design | Risk<br>of<br>bias | Quality assessment |              |             |                         | No. of patients |         | Effect                  | Quality |
|-------------------|--------|--------------------|--------------------|--------------|-------------|-------------------------|-----------------|---------|-------------------------|---------|
|                   |        |                    | Inconsistency      | Indirectness | Imprecision | Other<br>considerations | Group<br>1      | Group 2 | Relative<br>(95%<br>CI) |         |
| Outcome 1         |        |                    |                    |              |             |                         |                 |         |                         |         |
|                   |        |                    |                    |              |             |                         |                 |         |                         |         |
| Outcome 2         |        |                    |                    |              |             |                         |                 |         |                         |         |
|                   |        |                    |                    |              |             |                         |                 |         |                         |         |
| Outcome 3         |        |                    |                    |              |             |                         |                 |         |                         |         |
|                   |        |                    |                    |              |             |                         |                 |         |                         |         |
| Outcome 4         |        |                    |                    |              |             |                         |                 |         |                         |         |
|                   |        |                    |                    |              |             |                         |                 |         |                         |         |

**Supplemental Table 6.3 Quality of evidence grades**

| Grade    | Definition                                                                                                                                                     |
|----------|----------------------------------------------------------------------------------------------------------------------------------------------------------------|
| High     | We are very confident that the true effect lies is similar to the estimate of the effect.                                                                      |
| Moderate | We are moderately confident in the effect estimate: the true effect is likely to be close to the estimate of the effect, but it may be substantially different |
| Low      | Our confidence in the effect estimate is limited: the true effect may be substantially different from the estimate of the effect.                              |
| Very Low | We have very little confidence in the effect estimate: the true effect is likely to be substantially different from the estimate of the effect.                |

**Supplemental Table 6.4 Factors that may reduce the quality of the evidence**

| Factor                                                      | Consequence     |
|-------------------------------------------------------------|-----------------|
| Limitations in the study design or execution (risk of bias) | ↓ 1 or 2 levels |
| Inconsistency of the results                                | ↓ 1 or 2 levels |
| Indirectness of the evidence                                | ↓ 1 or 2 levels |
| Imprecision                                                 | ↓ 1 or 2 levels |
| Publication bias                                            | ↓ 1 or 2 levels |

**Supplemental Table 6.5 Factors that may increase the quality of the evidence**

| Factor                                                                                                               | Consequence     |
|----------------------------------------------------------------------------------------------------------------------|-----------------|
| Large magnitude of effect                                                                                            | ↑ 1 or 2 levels |
| All plausible confounding factors would reduce the described effect or increase the effect if no effect was observed | ↑ 1 level       |
| Dose-response gradient                                                                                               | ↑ 1 level       |
